# Supplementary material for: Polyhydric Stigmastane-Type Steroids Derivative from Vernonia amygdalina and Their Anti-Neuroinflammatory Activity
Source: MDPI journal article supplement (doi:10.3390/ph15091160), 2022-09-19

# Polyhydric Stigmastane-type Steroids Derivative from *Vernonia amygdalina* and Their Anti-neuroinflammatory Activity

Xiangzhong Liu,<sup>†</sup> Mi Zhou,<sup>†</sup> Shoulun He, Qiannan Xu, Chunchun Du, Honghong Zhu, Ting Lin, Guanghui Wang, Wenjing Tian\* and Haifeng Chen\*

Fujian Provincial Key Laboratory of Innovative Drug Target, School of Pharmaceutical Sciences, Xiamen University, Xiamen 361005, China

\* Correspondence: tianwj@xmu.edu.cn (Wenjing Tian); haifeng@xmu.edu.cn (Haifeng Chen)

<sup>†</sup> These authors contributed equally to this work.

## List of Supporting Information

|                                                                                                 |       |
|-------------------------------------------------------------------------------------------------|-------|
| 1. Figure S1. Optimized geometries of predominant conformers for compound <b>1</b> .....        | 4     |
| 2. Table S1. Cartesian coordinates for the optimized conformers of <b>1</b> . ....              | 4-14  |
| 3. Spectral information of <b>1</b> .....                                                       | 15-19 |
| 3.1 HR-ESI-MS and UV (CH <sub>3</sub> OH) spectrum of <b>1</b> .....                            | 15-16 |
| 3.2 1D and 2D NMR spectra of <b>1</b> in pyridine-d <sub>5</sub> .....                          | 17-19 |
| 3.2.1 <sup>1</sup> H NMR spectrum of <b>1</b> in pyridine-d <sub>5</sub> .....                  | 17    |
| 3.2.2 <sup>13</sup> C NMR spectrum of <b>1</b> in pyridine-d <sub>5</sub> .....                 | 17    |
| 3.2.3 <sup>1</sup> H- <sup>1</sup> H COSY spectrum of <b>1</b> in pyridine-d <sub>5</sub> ..... | 18    |
| 3.2.4 HSQC spectrum of <b>1</b> in pyridine-d <sub>5</sub> .....                                | 19    |
| 3.2.5 HMBC spectrum of <b>1</b> in pyridine-d <sub>5</sub> .....                                | 19    |
| 3.2.6 NOESY spectrum of <b>1</b> in pyridine-d <sub>5</sub> .....                               | 19    |
| 4. Spectral information of <b>2</b> .....                                                       | 20-25 |
| 4.1 HR-ESI-MS and UV (CH <sub>3</sub> OH) spectrum of <b>2</b> .....                            | 20-21 |
| 4.2 1D and 2D NMR spectra of <b>2</b> in pyridine-d <sub>5</sub> .....                          | 22-25 |
| 4.2.1 <sup>1</sup> H NMR spectrum of <b>2</b> in pyridine-d <sub>5</sub> .....                  | 22    |
| 4.2.2 <sup>13</sup> C NMR spectrum of <b>2</b> in pyridine-d <sub>5</sub> .....                 | 22    |
| 4.2.3 DEPT-135 spectrum of <b>3</b> in pyridine-d <sub>5</sub> .....                            | 23    |
| 4.2.4 <sup>1</sup> H- <sup>1</sup> H COSY spectrum of <b>2</b> in pyridine-d <sub>5</sub> ..... | 23    |
| 4.2.5 HSQC spectrum of <b>2</b> in pyridine-d <sub>5</sub> .....                                | 24    |
| 4.2.6 HMBC spectrum of <b>2</b> in pyridine-d <sub>5</sub> .....                                | 24    |
| 4.2.7 NOESY spectrum of <b>2</b> in pyridine-d <sub>5</sub> .....                               | 25    |
| 5. Spectral information of <b>3</b> .....                                                       | 26-31 |
| 5.1 HR-ESI-MS and UV (CH <sub>3</sub> OH) spectrum of <b>3</b> .....                            | 26-27 |
| 5.2 1D and 2D NMR spectra of <b>3</b> in pyridine-d <sub>5</sub> .....                          | 28-31 |
| 5.2.1 <sup>1</sup> H NMR spectrum of <b>3</b> in pyridine-d <sub>5</sub> .....                  | 28    |
| 5.2.2 <sup>13</sup> C NMR spectrum of <b>3</b> in pyridine-d <sub>5</sub> .....                 | 28    |
| 5.2.3 DEPT-135 spectrum of <b>3</b> in pyridine-d <sub>5</sub> .....                            | 29    |
| 5.2.4 <sup>1</sup> H- <sup>1</sup> H COSY spectrum of <b>3</b> in pyridine-d <sub>5</sub> ..... | 29    |
| 5.2.5 HSQC spectrum of <b>3</b> in pyridine-d <sub>5</sub> .....                                | 30    |
| 5.2.6 HMBC spectrum of <b>3</b> in pyridine-d <sub>5</sub> .....                                | 30    |
| 5.2.7 NOESY spectrum of <b>3</b> in pyridine-d <sub>5</sub> .....                               | 31    |
| 6. Spectral information of <b>4</b> .....                                                       | 32-37 |
| 6.1 HR-ESI-MS and UV (CH <sub>3</sub> OH) spectrum of <b>4</b> .....                            | 32-33 |
| 6.2 1D and 2D NMR spectra of <b>4</b> in pyridine-d <sub>5</sub> .....                          | 34-37 |
| 6.2.1 <sup>1</sup> H NMR spectrum of <b>4</b> in pyridine-d <sub>5</sub> .....                  | 34    |
| 6.2.2 <sup>13</sup> C NMR spectrum of <b>4</b> in pyridine-d <sub>5</sub> .....                 | 34    |
| 6.2.3 DEPT-135 spectrum of <b>4</b> in pyridine-d <sub>5</sub> .....                            | 35    |
| 6.2.4 <sup>1</sup> H- <sup>1</sup> H COSY spectrum of <b>4</b> in pyridine-d <sub>5</sub> ..... | 35    |
| 6.2.5 HSQC spectrum of <b>4</b> in pyridine-d <sub>5</sub> .....                                | 36    |
| 6.2.6 HMBC spectrum of <b>4</b> in pyridine-d <sub>5</sub> .....                                | 36    |
| 6.2.7 NOESY spectrum of <b>4</b> in pyridine-d <sub>5</sub> .....                               | 37    |
| 7. Spectral information of <b>5</b> .....                                                       | 38-43 |

|                                                                                                  |       |
|--------------------------------------------------------------------------------------------------|-------|
| 7.1 HR-ESI-MS and UV (CH <sub>3</sub> OH) spectrum of <b>5</b> .....                             | 38-39 |
| 7.2 1D and 2D NMR spectra of <b>5</b> in pyridine-d <sub>5</sub> .....                           | 40-43 |
| 7.2.1 <sup>1</sup> H NMR spectrum of <b>5</b> in pyridine-d <sub>5</sub> .....                   | 40    |
| 7.2.2 <sup>13</sup> C NMR spectrum of <b>5</b> in pyridine-d <sub>5</sub> .....                  | 40    |
| 7.2.3 DEPT-135 spectrum of <b>5</b> in pyridine-d <sub>5</sub> .....                             | 41    |
| 7.2.4 <sup>1</sup> H- <sup>1</sup> H COSY spectrum of <b>5</b> in pyridine-d <sub>5</sub> .....  | 41    |
| 7.2.5 HSQC spectrum of <b>5</b> in pyridine-d <sub>5</sub> .....                                 | 42    |
| 7.2.6 HMBC spectrum of <b>5</b> in pyridine-d <sub>5</sub> .....                                 | 42    |
| 7.2.7 NOESY spectrum of <b>5</b> in pyridine-d <sub>5</sub> .....                                | 43    |
| 8. Spectral information of <b>6</b> .....                                                        | 44-49 |
| 8.1 HR-ESI-MS and UV (CH <sub>3</sub> OH) spectrum of <b>6</b> .....                             | 44-45 |
| 8.2 1D and 2D NMR spectra of <b>6</b> in pyridine-d <sub>5</sub> .....                           | 46-49 |
| 8.2.1 <sup>1</sup> H NMR spectrum of <b>6</b> in pyridine-d <sub>5</sub> .....                   | 46    |
| 8.2.2 <sup>13</sup> C NMR spectrum of <b>6</b> in pyridine-d <sub>5</sub> .....                  | 46    |
| 8.2.3 DEPT-135 spectrum of <b>6</b> in pyridine-d <sub>5</sub> .....                             | 47    |
| 8.2.4 <sup>1</sup> H- <sup>1</sup> H COSY spectrum of <b>6</b> in pyridine-d <sub>5</sub> .....  | 47    |
| 8.2.5 HSQC spectrum of <b>6</b> in pyridine-d <sub>5</sub> .....                                 | 48    |
| 8.2.6 HMBC spectrum of <b>6</b> in pyridine-d <sub>5</sub> .....                                 | 48    |
| 8.2.7 NOESY spectrum of <b>6</b> in pyridine-d <sub>5</sub> .....                                | 49    |
| 9. Spectral information of <b>7</b> .....                                                        | 50-55 |
| 9.1 HR-ESI-MS and UV (CH <sub>3</sub> OH) spectrum of <b>7</b> .....                             | 50-51 |
| 9.2 1D and 2D NMR spectra of <b>7</b> in CD <sub>3</sub> OD .....                                | 52-55 |
| 9.2.1 <sup>1</sup> H NMR spectrum of <b>7</b> in CD <sub>3</sub> OD .....                        | 52    |
| 9.2.2 <sup>13</sup> C NMR spectrum of <b>7</b> in CD <sub>3</sub> OD .....                       | 52    |
| 9.2.3 DEPT-135 spectrum of <b>7</b> in CD <sub>3</sub> OD .....                                  | 53    |
| 9.2.4 <sup>1</sup> H- <sup>1</sup> H COSY spectrum of <b>7</b> in CD <sub>3</sub> OD .....       | 53    |
| 9.2.5 HSQC spectrum of <b>7</b> in CD <sub>3</sub> OD .....                                      | 54    |
| 9.2.6 HMBC spectrum of <b>7</b> in CD <sub>3</sub> OD .....                                      | 54    |
| 9.2.7 NOESY spectrum of <b>7</b> in CD <sub>3</sub> OD .....                                     | 55    |
| 10. Spectral information of <b>8</b> .....                                                       | 56-61 |
| 10.1 HR-ESI-MS and UV (CH <sub>3</sub> OH) spectrum of <b>8</b> .....                            | 56-57 |
| 10.2 1D and 2D NMR spectra of <b>8</b> in pyridine-d <sub>5</sub> .....                          | 58-61 |
| 10.2.1 <sup>1</sup> H NMR spectrum of <b>8</b> in pyridine-d <sub>5</sub> .....                  | 58    |
| 10.2.2 <sup>13</sup> C NMR spectrum of <b>8</b> in pyridine-d <sub>5</sub> .....                 | 58    |
| 10.2.3 DEPT-135 spectrum of <b>8</b> in pyridine-d <sub>5</sub> .....                            | 59    |
| 10.2.4 <sup>1</sup> H- <sup>1</sup> H COSY spectrum of <b>8</b> in pyridine-d <sub>5</sub> ..... | 59    |
| 10.2.5 HSQC spectrum of <b>8</b> in pyridine-d <sub>5</sub> .....                                | 60    |
| 10.2.6 HMBC spectrum of <b>8</b> in pyridine-d <sub>5</sub> .....                                | 60    |
| 10.2.7 NOESY spectrum of <b>8</b> in pyridine-d <sub>5</sub> .....                               | 61    |

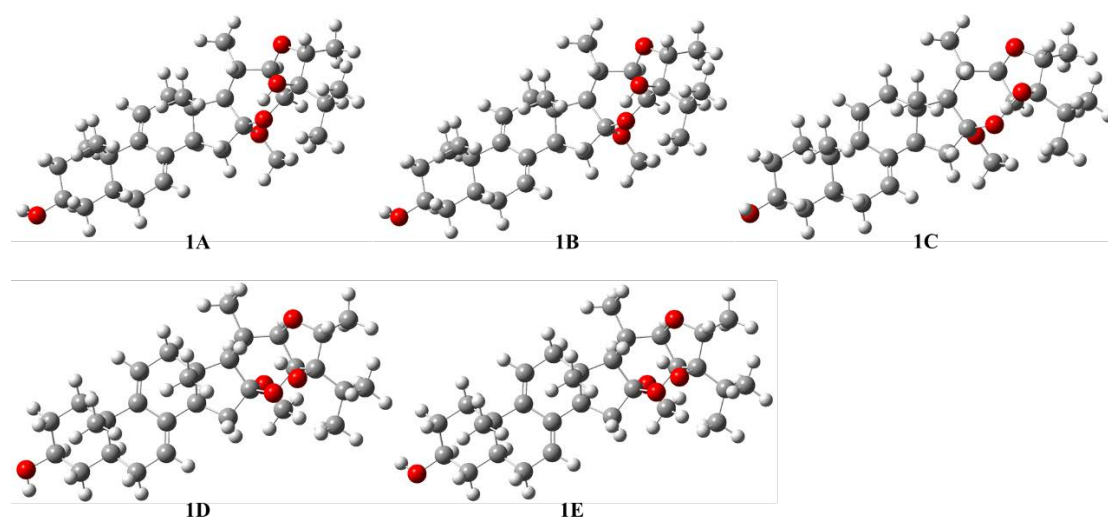

Figure S1. Optimized geometries of predominant conformers for compound **1**.

Table S1. Cartesian coordinates for the optimized conformers of **1**

Cartesian coordinates of optimized compound **1A**

| Center Number | Atomic Number | Atomic Type | Coordinates (Angstroms) |          |          |
|---------------|---------------|-------------|-------------------------|----------|----------|
|               |               |             | X                       | Y        | Z        |
| 1             | 6             | 0           | -9.8089                 | -1.3551  | -1.50811 |
| 2             | 6             | 0           | -9.55105                | -2.74076 | -2.10574 |
| 3             | 6             | 0           | -8.47955                | -3.48168 | -1.31187 |
| 4             | 6             | 0           | -7.18384                | -2.6612  | -1.20798 |
| 5             | 6             | 0           | -7.39804                | -1.24733 | -0.58243 |
| 6             | 6             | 0           | -8.51309                | -0.53331 | -1.39164 |
| 7             | 6             | 0           | -6.06602                | -3.431   | -0.49286 |
| 8             | 6             | 0           | -4.81453                | -2.60331 | -0.40388 |
| 9             | 6             | 0           | -4.81192                | -1.25993 | -0.52175 |
| 10            | 6             | 0           | -6.06413                | -0.47619 | -0.63488 |
| 11            | 6             | 0           | -3.54751                | -0.44429 | -0.64262 |
| 12            | 6             | 0           | -3.6058                 | 0.905025 | 0.124606 |
| 13            | 6             | 0           | -4.75561                | 1.71039  | -0.51195 |
| 14            | 6             | 0           | -6.01061                | 0.874961 | -0.66206 |
| 15            | 6             | 0           | -2.19175                | -1.03516 | -0.25529 |
| 16            | 6             | 0           | -1.26561                | 0.194563 | -0.3402  |
| 17            | 6             | 0           | -2.16484                | 1.463724 | -0.13669 |
| 18            | 8             | 0           | -0.25608                | 0.066697 | 0.66124  |
| 19            | 6             | 0           | 0.660152                | 1.167767 | 0.713787 |
| 20            | 6             | 0           | -0.0506                 | 2.544802 | 0.69184  |
| 21            | 6             | 0           | -1.56716                | 2.433598 | 0.902275 |
| 22            | 6             | 0           | 1.429962                | 1.141668 | 2.062732 |
| 23            | 6             | 0           | 1.699767                | 2.65523  | 2.264689 |
| 24            | 8             | 0           | 0.523137                | 3.30775  | 1.763072 |



|    |   |   |          |          |          |
|----|---|---|----------|----------|----------|
| 25 | 6 | 0 | -7.81043 | -1.33859 | 0.912308 |
| 26 | 8 | 0 | -10.7276 | -3.55968 | -2.10204 |
| 27 | 6 | 0 | -2.21675 | 3.823867 | 0.863532 |
| 28 | 6 | 0 | 2.939966 | 3.229561 | 1.570291 |
| 29 | 6 | 0 | 2.696488 | 0.245356 | 2.08236  |
| 30 | 6 | 0 | 3.416374 | 0.323009 | 3.440906 |
| 31 | 6 | 0 | 2.3928   | -1.22496 | 1.746456 |
| 32 | 8 | 0 | 0.53324  | 0.750385 | 3.107928 |
| 33 | 1 | 0 | -6.82806 | -2.48247 | -2.23513 |
| 34 | 1 | 0 | -3.47319 | -0.16925 | -1.70821 |
| 35 | 6 | 0 | -3.89029 | 0.692869 | 1.627207 |
| 36 | 1 | 0 | -1.69443 | 2.019484 | 1.907259 |
| 37 | 1 | 0 | -2.17598 | 1.971863 | -1.10875 |
| 38 | 1 | 0 | 0.150681 | 3.058978 | -0.25978 |
| 39 | 1 | 0 | 1.366172 | 1.083673 | -0.11984 |
| 40 | 8 | 0 | -0.66508 | 0.357143 | -1.62356 |
| 41 | 6 | 0 | 0.171094 | -0.69747 | -2.09584 |
| 42 | 1 | 0 | -10.2797 | -1.48478 | -0.52594 |
| 43 | 1 | 0 | -10.5295 | -0.80696 | -2.1312  |
| 44 | 1 | 0 | -9.19725 | -2.61996 | -3.14402 |
| 45 | 1 | 0 | -8.27091 | -4.44213 | -1.79851 |
| 46 | 1 | 0 | -8.88031 | -3.71648 | -0.31777 |
| 47 | 1 | 0 | -8.75318 | 0.433859 | -0.93705 |
| 48 | 1 | 0 | -8.12966 | -0.31763 | -2.39815 |
| 49 | 1 | 0 | -6.39936 | -3.75297 | 0.50626  |
| 50 | 1 | 0 | -5.85176 | -4.35861 | -1.04052 |
| 51 | 1 | 0 | -3.87033 | -3.13226 | -0.29336 |
| 52 | 1 | 0 | -4.99591 | 2.600406 | 0.083473 |
| 53 | 1 | 0 | -4.44065 | 2.088354 | -1.49743 |
| 54 | 1 | 0 | -6.93462 | 1.439885 | -0.75129 |
| 55 | 1 | 0 | -1.85973 | -1.84567 | -0.90748 |
| 56 | 1 | 0 | -2.19739 | -1.41937 | 0.768879 |
| 57 | 1 | 0 | 1.737304 | 2.870118 | 3.336828 |
| 58 | 1 | 0 | -8.03434 | -0.33705 | 1.294011 |
| 59 | 1 | 0 | -7.00315 | -1.74839 | 1.526155 |
| 60 | 1 | 0 | -8.69543 | -1.96282 | 1.065446 |
| 61 | 1 | 0 | -11.4236 | -3.10864 | -2.59816 |
| 62 | 1 | 0 | -3.2824  | 3.778702 | 1.107232 |
| 63 | 1 | 0 | -1.73296 | 4.487476 | 1.585127 |
| 64 | 1 | 0 | -2.12029 | 4.273734 | -0.13281 |
| 65 | 1 | 0 | 2.926737 | 4.317392 | 1.682812 |
| 66 | 1 | 0 | 3.86951  | 2.852985 | 2.006635 |
| 67 | 1 | 0 | 2.949398 | 3.005393 | 0.497948 |

|    |   |   |          |          |          |
|----|---|---|----------|----------|----------|
| 68 | 1 | 0 | 3.372828 | 0.628665 | 1.306182 |
| 69 | 1 | 0 | 4.320073 | -0.29603 | 3.426608 |
| 70 | 1 | 0 | 3.718403 | 1.342017 | 3.701376 |
| 71 | 1 | 0 | 2.762654 | -0.04391 | 4.237768 |
| 72 | 1 | 0 | 3.320766 | -1.80719 | 1.749044 |
| 73 | 1 | 0 | 1.923503 | -1.34049 | 0.766039 |
| 74 | 1 | 0 | 1.723376 | -1.66795 | 2.491815 |
| 75 | 1 | 0 | -0.08376 | 0.108222 | 2.725173 |
| 76 | 1 | 0 | -4.83616 | 0.166001 | 1.773325 |
| 77 | 1 | 0 | -3.10706 | 0.111911 | 2.122533 |
| 78 | 1 | 0 | -3.96364 | 1.652388 | 2.148235 |
| 79 | 1 | 0 | 0.745547 | -0.27946 | -2.92561 |
| 80 | 1 | 0 | 0.858498 | -1.05022 | -1.31933 |
| 81 | 1 | 0 | -0.4149  | -1.54682 | -2.4684  |

Cartesian coordinates of optimized compound **1B**

| Center Number | Atomic Number | Atomic Type | Coordinates (Angstroms) |          |          |
|---------------|---------------|-------------|-------------------------|----------|----------|
|               |               |             | X                       | Y        | Z        |
| 1             | 6             | 0           | -9.85118                | -1.21729 | -1.51194 |
| 2             | 6             | 0           | -9.61539                | -2.59953 | -2.1117  |
| 3             | 6             | 0           | -8.55235                | -3.36287 | -1.316   |
| 4             | 6             | 0           | -7.24105                | -2.56614 | -1.21126 |
| 5             | 6             | 0           | -7.43656                | -1.15216 | -0.58044 |
| 6             | 6             | 0           | -8.54199                | -0.42    | -1.38715 |
| 7             | 6             | 0           | -6.13338                | -3.35511 | -0.50111 |
| 8             | 6             | 0           | -4.86995                | -2.54546 | -0.41211 |
| 9             | 6             | 0           | -4.84974                | -1.20169 | -0.52369 |
| 10            | 6             | 0           | -6.09138                | -0.40041 | -0.63    |
| 11            | 6             | 0           | -3.57463                | -0.40286 | -0.64365 |
| 12            | 6             | 0           | -3.61233                | 0.942317 | 0.132039 |
| 13            | 6             | 0           | -4.75275                | 1.767247 | -0.49634 |
| 14            | 6             | 0           | -6.01917                | 0.949954 | -0.64946 |
| 15            | 6             | 0           | -2.22591                | -1.01461 | -0.26419 |
| 16            | 6             | 0           | -1.28331                | 0.202937 | -0.34417 |
| 17            | 6             | 0           | -2.16454                | 1.482844 | -0.12978 |
| 18            | 8             | 0           | -0.27247                | 0.054804 | 0.653076 |
| 19            | 6             | 0           | 0.658729                | 1.143151 | 0.710041 |
| 20            | 6             | 0           | -0.03353                | 2.529739 | 0.699846 |
| 21            | 6             | 0           | -1.55085                | 2.437567 | 0.913824 |
| 22            | 6             | 0           | 1.432545                | 1.097422 | 2.056165 |
| 23            | 6             | 0           | 1.722871                | 2.605889 | 2.267803 |
| 24            | 8             | 0           | 0.553222                | 3.277204 | 1.77489  |
| 25            | 6             | 0           | -7.85007                | -1.2437  | 0.913925 |

|    |   |   |          |          |          |
|----|---|---|----------|----------|----------|
| 26 | 8 | 0 | -10.8767 | -3.28056 | -2.12253 |
| 27 | 6 | 0 | -2.18166 | 3.836743 | 0.886108 |
| 28 | 6 | 0 | 2.968144 | 3.168824 | 1.57312  |
| 29 | 6 | 0 | 2.687321 | 0.184642 | 2.065373 |
| 30 | 6 | 0 | 3.412643 | 0.243674 | 3.421973 |
| 31 | 6 | 0 | 2.36346  | -1.27932 | 1.720578 |
| 32 | 8 | 0 | 0.534203 | 0.710436 | 3.101568 |
| 33 | 1 | 0 | -6.88552 | -2.3888  | -2.23872 |
| 34 | 1 | 0 | -3.5     | -0.12233 | -1.70776 |
| 35 | 6 | 0 | -3.8958  | 0.724651 | 1.634066 |
| 36 | 1 | 0 | -1.6809  | 2.018518 | 1.916403 |
| 37 | 1 | 0 | -2.17142 | 1.997483 | -1.09844 |
| 38 | 1 | 0 | 0.172101 | 3.047916 | -0.24867 |
| 39 | 1 | 0 | 1.360736 | 1.05527  | -0.12656 |
| 40 | 8 | 0 | -0.68474 | 0.365418 | -1.62848 |
| 41 | 6 | 0 | 0.136155 | -0.69704 | -2.10976 |
| 42 | 1 | 0 | -10.3285 | -1.34381 | -0.53264 |
| 43 | 1 | 0 | -10.5641 | -0.66793 | -2.13707 |
| 44 | 1 | 0 | -9.26065 | -2.47746 | -3.1495  |
| 45 | 1 | 0 | -8.34666 | -4.32842 | -1.80119 |
| 46 | 1 | 0 | -8.95596 | -3.5921  | -0.32168 |
| 47 | 1 | 0 | -8.76856 | 0.54751  | -0.92653 |
| 48 | 1 | 0 | -8.15329 | -0.20242 | -2.39126 |
| 49 | 1 | 0 | -6.46954 | -3.67523 | 0.497663 |
| 50 | 1 | 0 | -5.93289 | -4.28392 | -1.05243 |
| 51 | 1 | 0 | -3.93292 | -3.08795 | -0.30671 |
| 52 | 1 | 0 | -4.97989 | 2.656331 | 0.105573 |
| 53 | 1 | 0 | -4.43523 | 2.147706 | -1.48003 |
| 54 | 1 | 0 | -6.93553 | 1.527727 | -0.73472 |
| 55 | 1 | 0 | -1.90685 | -1.82541 | -0.92249 |
| 56 | 1 | 0 | -2.23376 | -1.4051  | 0.757591 |
| 57 | 1 | 0 | 1.766867 | 2.812686 | 3.341284 |
| 58 | 1 | 0 | -8.05411 | -0.23985 | 1.300334 |
| 59 | 1 | 0 | -7.05132 | -1.67258 | 1.526093 |
| 60 | 1 | 0 | -8.74838 | -1.84945 | 1.063771 |
| 61 | 1 | 0 | -10.7536 | -4.16116 | -2.50113 |
| 62 | 1 | 0 | -3.24706 | 3.804558 | 1.132849 |
| 63 | 1 | 0 | -1.68672 | 4.489028 | 1.610454 |
| 64 | 1 | 0 | -2.08212 | 4.291705 | -0.10761 |
| 65 | 1 | 0 | 3.894174 | 2.777251 | 2.003695 |
| 66 | 1 | 0 | 2.971117 | 2.951973 | 0.499233 |
| 67 | 1 | 0 | 2.969415 | 4.25593  | 1.693137 |
| 68 | 1 | 0 | 3.366035 | 0.564412 | 1.289533 |

|    |   |   |          |          |          |
|----|---|---|----------|----------|----------|
| 69 | 1 | 0 | 4.308078 | -0.38707 | 3.400521 |
| 70 | 1 | 0 | 3.72891  | 1.256858 | 3.68818  |
| 71 | 1 | 0 | 2.756758 | -0.11992 | 4.218581 |
| 72 | 1 | 0 | 3.28382  | -1.87349 | 1.715972 |
| 73 | 1 | 0 | 1.889357 | -1.38214 | 0.741044 |
| 74 | 1 | 0 | 1.690921 | -1.71864 | 2.465307 |
| 75 | 1 | 0 | -0.09299 | 0.079889 | 2.716098 |
| 76 | 1 | 0 | -4.84879 | 0.210556 | 1.779429 |
| 77 | 1 | 0 | -3.11968 | 0.12941  | 2.12362  |
| 78 | 1 | 0 | -3.95407 | 1.681766 | 2.161338 |
| 79 | 1 | 0 | 0.713048 | -0.28162 | -2.93914 |
| 80 | 1 | 0 | 0.821643 | -1.06309 | -1.33773 |
| 81 | 1 | 0 | -0.46196 | -1.53667 | -2.48515 |

Cartesian coordinates of optimized compound **1C**

| Center Number | Atomic Number | Atomic Type | Coordinates (Angstroms) |          |          |
|---------------|---------------|-------------|-------------------------|----------|----------|
|               |               |             | X                       | Y        | Z        |
| 1             | 6             | 0           | -9.80612                | -1.28235 | -1.6408  |
| 2             | 6             | 0           | -9.55283                | -2.66768 | -2.24066 |
| 3             | 6             | 0           | -8.49323                | -3.42183 | -1.4321  |
| 4             | 6             | 0           | -7.19181                | -2.61222 | -1.30223 |
| 5             | 6             | 0           | -7.40562                | -1.20006 | -0.67297 |
| 6             | 6             | 0           | -8.50486                | -0.47388 | -1.49327 |
| 7             | 6             | 0           | -6.08818                | -3.39356 | -0.5775  |
| 8             | 6             | 0           | -4.83238                | -2.57465 | -0.46851 |
| 9             | 6             | 0           | -4.81994                | -1.2307  | -0.57897 |
| 10            | 6             | 0           | -6.06552                | -0.43813 | -0.70316 |
| 11            | 6             | 0           | -3.54897                | -0.4227  | -0.68027 |
| 12            | 6             | 0           | -3.60755                | 0.92236  | 0.09437  |
| 13            | 6             | 0           | -4.74455                | 1.738994 | -0.55072 |
| 14            | 6             | 0           | -6.00287                | 0.912766 | -0.72146 |
| 15            | 6             | 0           | -2.20161                | -1.02471 | -0.28109 |
| 16            | 6             | 0           | -1.26669                | 0.199552 | -0.34798 |
| 17            | 6             | 0           | -2.16005                | 1.473219 | -0.14667 |
| 18            | 8             | 0           | -0.26945                | 0.058885 | 0.663902 |
| 19            | 6             | 0           | 0.653137                | 1.153788 | 0.733824 |
| 20            | 6             | 0           | -0.04872                | 2.535428 | 0.713183 |
| 21            | 6             | 0           | -1.56829                | 2.432512 | 0.905406 |
| 22            | 6             | 0           | 1.40782                 | 1.113951 | 2.09096  |
| 23            | 6             | 0           | 1.684432                | 2.624465 | 2.306121 |
| 24            | 8             | 0           | 0.517161                | 3.287319 | 1.796282 |
| 25            | 6             | 0           | -7.83747                | -1.29544 | 0.81595  |
| 26            | 8             | 0           | -10.7607                | -3.42319 | -2.38732 |

|    |   |   |          |          |          |
|----|---|---|----------|----------|----------|
| 27 | 6 | 0 | -2.20859 | 3.827149 | 0.868275 |
| 28 | 6 | 0 | 2.935468 | 3.19593  | 1.629041 |
| 29 | 6 | 0 | 2.668668 | 0.209913 | 2.11853  |
| 30 | 6 | 0 | 3.374089 | 0.274374 | 3.485324 |
| 31 | 6 | 0 | 2.359963 | -1.25632 | 1.769595 |
| 32 | 8 | 0 | 0.497188 | 0.72112  | 3.123522 |
| 33 | 1 | 0 | -6.82305 | -2.43139 | -2.32429 |
| 34 | 1 | 0 | -3.46078 | -0.14189 | -1.74327 |
| 35 | 6 | 0 | -3.91095 | 0.703013 | 1.592209 |
| 36 | 1 | 0 | -1.7097  | 2.012733 | 1.906156 |
| 37 | 1 | 0 | -2.15662 | 1.987601 | -1.11548 |
| 38 | 1 | 0 | 0.166775 | 3.054783 | -0.23248 |
| 39 | 1 | 0 | 1.367666 | 1.070616 | -0.09259 |
| 40 | 8 | 0 | -0.65102 | 0.366149 | -1.62348 |
| 41 | 6 | 0 | 0.183843 | -0.69072 | -2.09318 |
| 42 | 1 | 0 | -10.2915 | -1.40283 | -0.66126 |
| 43 | 1 | 0 | -10.5152 | -0.73684 | -2.27374 |
| 44 | 1 | 0 | -9.19111 | -2.54745 | -3.26993 |
| 45 | 1 | 0 | -8.28504 | -4.38242 | -1.91883 |
| 46 | 1 | 0 | -8.89897 | -3.65795 | -0.43705 |
| 47 | 1 | 0 | -8.74393 | 0.492221 | -1.03577 |
| 48 | 1 | 0 | -8.10559 | -0.25403 | -2.49256 |
| 49 | 1 | 0 | -6.43591 | -3.71849 | 0.415923 |
| 50 | 1 | 0 | -5.87335 | -4.31957 | -1.12764 |
| 51 | 1 | 0 | -3.89309 | -3.11046 | -0.35003 |
| 52 | 1 | 0 | -4.9865  | 2.626823 | 0.047257 |
| 53 | 1 | 0 | -4.41574 | 2.121041 | -1.53005 |
| 54 | 1 | 0 | -6.92185 | 1.484255 | -0.81997 |
| 55 | 1 | 0 | -1.86729 | -1.83336 | -0.9344  |
| 56 | 1 | 0 | -2.22133 | -1.41496 | 0.740634 |
| 57 | 1 | 0 | 1.711595 | 2.831942 | 3.380026 |
| 58 | 1 | 0 | -8.05753 | -0.29408 | 1.200095 |
| 59 | 1 | 0 | -7.04235 | -1.71615 | 1.438234 |
| 60 | 1 | 0 | -8.73056 | -1.91179 | 0.955508 |
| 61 | 1 | 0 | -11.1456 | -3.56193 | -1.51075 |
| 62 | 1 | 0 | -3.27726 | 3.787375 | 1.099375 |
| 63 | 1 | 0 | -1.72897 | 4.482934 | 1.59973  |
| 64 | 1 | 0 | -2.09775 | 4.282865 | -0.12389 |
| 65 | 1 | 0 | 2.927539 | 4.283037 | 1.748784 |
| 66 | 1 | 0 | 3.857962 | 2.810818 | 2.072818 |
| 67 | 1 | 0 | 2.955179 | 2.978927 | 0.555366 |
| 68 | 1 | 0 | 3.355735 | 0.594203 | 1.352336 |
| 69 | 1 | 0 | 4.274196 | -0.34998 | 3.4768   |

|    |   |   |          |          |          |
|----|---|---|----------|----------|----------|
| 70 | 1 | 0 | 3.679317 | 1.289826 | 3.755738 |
| 71 | 1 | 0 | 2.709537 | -0.09378 | 4.2726   |
| 72 | 1 | 0 | 3.284416 | -1.84404 | 1.778174 |
| 73 | 1 | 0 | 1.900547 | -1.36258 | 0.783461 |
| 74 | 1 | 0 | 1.68004  | -1.70028 | 2.504815 |
| 75 | 1 | 0 | -0.11918 | 0.085155 | 2.729603 |
| 76 | 1 | 0 | -4.86199 | 0.181654 | 1.724038 |
| 77 | 1 | 0 | -3.13743 | 0.113809 | 2.093006 |
| 78 | 1 | 0 | -3.98397 | 1.659816 | 2.118204 |
| 79 | 1 | 0 | 0.769663 | -0.27119 | -2.91417 |
| 80 | 1 | 0 | 0.860683 | -1.05231 | -1.31149 |
| 81 | 1 | 0 | -0.40324 | -1.53417 | -2.47724 |

Cartesian coordinates of optimized compound **1D**

| Center Number | Atomic Number | Atomic Type | Coordinates (Angstroms) |          |          |
|---------------|---------------|-------------|-------------------------|----------|----------|
|               |               |             | X                       | Y        | Z        |
| 1             | 6             | 0           | -9.86133                | -1.21338 | -1.55476 |
| 2             | 6             | 0           | -9.62281                | -2.58469 | -2.17813 |
| 3             | 6             | 0           | -8.56501                | -3.3631  | -1.39016 |
| 4             | 6             | 0           | -7.25383                | -2.56936 | -1.26334 |
| 5             | 6             | 0           | -7.45226                | -1.1671  | -0.60772 |
| 6             | 6             | 0           | -8.55238                | -0.41952 | -1.40756 |
| 7             | 6             | 0           | -6.15042                | -3.37175 | -0.56179 |
| 8             | 6             | 0           | -4.88717                | -2.56458 | -0.45101 |
| 9             | 6             | 0           | -4.86554                | -1.21905 | -0.53815 |
| 10            | 6             | 0           | -6.10638                | -0.41545 | -0.6354  |
| 11            | 6             | 0           | -3.58879                | -0.41975 | -0.63665 |
| 12            | 6             | 0           | -3.6302                 | 0.910477 | 0.16416  |
| 13            | 6             | 0           | -4.76751                | 1.74821  | -0.45288 |
| 14            | 6             | 0           | -6.03385                | 0.93502  | -0.62764 |
| 15            | 6             | 0           | -2.24271                | -1.03905 | -0.26139 |
| 16            | 6             | 0           | -1.29686                | 0.177265 | -0.31389 |
| 17            | 6             | 0           | -2.18069                | 1.454641 | -0.08134 |
| 18            | 8             | 0           | -0.29822                | 0.008928 | 0.681406 |
| 19            | 6             | 0           | 0.633326                | 1.085686 | 0.73985  |
| 20            | 6             | 0           | -0.05747                | 2.476593 | 0.785082 |
| 21            | 6             | 0           | -1.57352                | 2.385936 | 0.987692 |
| 22            | 6             | 0           | 1.50097                 | 1.044241 | 2.035695 |
| 23            | 6             | 0           | 1.813268                | 2.559461 | 2.183177 |
| 24            | 8             | 0           | 0.535926                | 3.167489 | 1.905661 |
| 25            | 6             | 0           | -7.87491                | -1.28609 | 0.882125 |
| 26            | 8             | 0           | -10.8845                | -3.2645  | -2.20904 |
| 27            | 6             | 0           | -2.20467                | 3.785435 | 0.996894 |

|    |   |   |          |          |          |
|----|---|---|----------|----------|----------|
| 28 | 6 | 0 | 2.907674 | 3.143229 | 1.285125 |
| 29 | 6 | 0 | 2.729817 | 0.112509 | 1.968632 |
| 30 | 6 | 0 | 3.615159 | 0.240379 | 3.222056 |
| 31 | 6 | 0 | 2.33844  | -1.36015 | 1.75491  |
| 32 | 8 | 0 | 0.728276 | 0.631624 | 3.163776 |
| 33 | 1 | 0 | -6.89246 | -2.37325 | -2.28533 |
| 34 | 1 | 0 | -3.5091  | -0.11905 | -1.69492 |
| 35 | 6 | 0 | -3.91874 | 0.660806 | 1.660476 |
| 36 | 1 | 0 | -1.72338 | 1.932665 | 1.974145 |
| 37 | 1 | 0 | -2.18205 | 1.991952 | -1.03753 |
| 38 | 1 | 0 | 0.156092 | 3.04067  | -0.13418 |
| 39 | 1 | 0 | 1.298361 | 1.029557 | -0.13033 |
| 40 | 8 | 0 | -0.70251 | 0.365015 | -1.60256 |
| 41 | 6 | 0 | 0.124098 | -0.68611 | -2.09732 |
| 42 | 1 | 0 | -10.3446 | -1.35743 | -0.58077 |
| 43 | 1 | 0 | -10.5702 | -0.65222 | -2.17404 |
| 44 | 1 | 0 | -9.26181 | -2.44408 | -3.21142 |
| 45 | 1 | 0 | -8.35701 | -4.31983 | -1.89158 |
| 46 | 1 | 0 | -8.97467 | -3.61008 | -0.40256 |
| 47 | 1 | 0 | -8.78108 | 0.539674 | -0.93084 |
| 48 | 1 | 0 | -8.15742 | -0.18403 | -2.40517 |
| 49 | 1 | 0 | -6.49208 | -3.71011 | 0.429103 |
| 50 | 1 | 0 | -5.94734 | -4.2904  | -1.12897 |
| 51 | 1 | 0 | -3.95096 | -3.10898 | -0.34921 |
| 52 | 1 | 0 | -4.99744 | 2.625742 | 0.165125 |
| 53 | 1 | 0 | -4.44539 | 2.147377 | -1.42767 |
| 54 | 1 | 0 | -6.94953 | 1.514923 | -0.70581 |
| 55 | 1 | 0 | -1.92156 | -1.8376  | -0.93357 |
| 56 | 1 | 0 | -2.25053 | -1.44589 | 0.753688 |
| 57 | 1 | 0 | 2.034704 | 2.787276 | 3.229762 |
| 58 | 1 | 0 | -8.08101 | -0.28946 | 1.285832 |
| 59 | 1 | 0 | -7.08001 | -1.72666 | 1.49096  |
| 60 | 1 | 0 | -8.77428 | -1.89418 | 1.015117 |
| 61 | 1 | 0 | -10.759  | -4.13911 | -2.60053 |
| 62 | 1 | 0 | -3.2719  | 3.745326 | 1.233298 |
| 63 | 1 | 0 | -1.71661 | 4.420174 | 1.741732 |
| 64 | 1 | 0 | -2.09738 | 4.266981 | 0.017025 |
| 65 | 1 | 0 | 3.894716 | 2.76138  | 1.562111 |
| 66 | 1 | 0 | 2.743346 | 2.919386 | 0.226324 |
| 67 | 1 | 0 | 2.918274 | 4.231053 | 1.401124 |
| 68 | 1 | 0 | 3.31686  | 0.435723 | 1.098021 |
| 69 | 1 | 0 | 4.492528 | -0.40893 | 3.129713 |
| 70 | 1 | 0 | 3.9772   | 1.261384 | 3.380843 |

|    |   |   |          |          |          |
|----|---|---|----------|----------|----------|
| 71 | 1 | 0 | 3.059964 | -0.06155 | 4.114812 |
| 72 | 1 | 0 | 3.240016 | -1.97833 | 1.679492 |
| 73 | 1 | 0 | 1.747689 | -1.50098 | 0.846589 |
| 74 | 1 | 0 | 1.740426 | -1.72464 | 2.595075 |
| 75 | 1 | 0 | 0.024439 | 1.280568 | 3.302508 |
| 76 | 1 | 0 | -4.86773 | 0.135277 | 1.790201 |
| 77 | 1 | 0 | -3.13871 | 0.063007 | 2.14043  |
| 78 | 1 | 0 | -3.99231 | 1.607339 | 2.205712 |
| 79 | 1 | 0 | 0.808631 | -1.06159 | -1.32878 |
| 80 | 1 | 0 | -0.46916 | -1.52311 | -2.48656 |
| 81 | 1 | 0 | 0.701908 | -0.25704 | -2.91939 |

Cartesian coordinates of optimized compound **1E**

| Center<br>Number | Atomic<br>Number | Atomic<br>Type | Coordinates (Angstroms) |          |          |
|------------------|------------------|----------------|-------------------------|----------|----------|
|                  |                  |                | X                       | Y        | Z        |
| 1                | 6                | 0              | -9.81943                | -1.35134 | -1.54966 |
| 2                | 6                | 0              | -9.55915                | -2.7259  | -2.17148 |
| 3                | 6                | 0              | -8.49239                | -3.48214 | -1.38577 |
| 4                | 6                | 0              | -7.19676                | -2.66462 | -1.25979 |
| 5                | 6                | 0              | -7.41358                | -1.2626  | -0.60893 |
| 6                | 6                | 0              | -8.52374                | -0.53283 | -1.41077 |
| 7                | 6                | 0              | -6.08282                | -3.44813 | -0.55369 |
| 8                | 6                | 0              | -4.83147                | -2.62289 | -0.44303 |
| 9                | 6                | 0              | -4.82751                | -1.27758 | -0.536   |
| 10               | 6                | 0              | -6.07902                | -0.49141 | -0.63953 |
| 11               | 6                | 0              | -3.56151                | -0.46134 | -0.63535 |
| 12               | 6                | 0              | -3.62326                | 0.872903 | 0.157525 |
| 13               | 6                | 0              | -4.77028                | 1.69143  | -0.46723 |
| 14               | 6                | 0              | -6.02522                | 0.860005 | -0.6391  |
| 15               | 6                | 0              | -2.20821                | -1.05985 | -0.25243 |
| 16               | 6                | 0              | -1.27892                | 0.168885 | -0.30984 |
| 17               | 6                | 0              | -2.18077                | 1.435456 | -0.08765 |
| 18               | 8                | 0              | -0.28101                | 0.020424 | 0.689501 |
| 19               | 6                | 0              | 0.635616                | 1.109987 | 0.743757 |
| 20               | 6                | 0              | -0.07402                | 2.491668 | 0.777637 |
| 21               | 6                | 0              | -1.58923                | 2.381713 | 0.977063 |
| 22               | 6                | 0              | 1.499648                | 1.088915 | 2.042514 |
| 23               | 6                | 0              | 1.791439                | 2.609099 | 2.180452 |
| 24               | 8                | 0              | 0.507084                | 3.198366 | 1.894838 |
| 25               | 6                | 0              | -7.83434                | -1.38184 | 0.88149  |
| 26               | 8                | 0              | -10.7364                | -3.54377 | -2.18937 |
| 27               | 6                | 0              | -2.23941                | 3.772476 | 0.975905 |
| 28               | 6                | 0              | 2.880769                | 3.201194 | 1.281677 |



|    |   |   |          |          |          |
|----|---|---|----------|----------|----------|
| 29 | 6 | 0 | 2.740949 | 0.17316  | 1.985709 |
| 30 | 6 | 0 | 3.620305 | 0.321193 | 3.241116 |
| 31 | 6 | 0 | 2.369857 | -1.30597 | 1.78065  |
| 32 | 8 | 0 | 0.729013 | 0.673906 | 3.171111 |
| 33 | 1 | 0 | -6.83566 | -2.46674 | -2.28155 |
| 34 | 1 | 0 | -3.48257 | -0.16567 | -1.69511 |
| 35 | 6 | 0 | -3.91205 | 0.628183 | 1.654595 |
| 36 | 1 | 0 | -1.73553 | 1.932567 | 1.965943 |
| 37 | 1 | 0 | -2.18692 | 1.966723 | -1.0472  |
| 38 | 1 | 0 | 0.13413  | 3.052256 | -0.145   |
| 39 | 1 | 0 | 1.304238 | 1.057201 | -0.12391 |
| 40 | 8 | 0 | -0.68327 | 0.356932 | -1.59775 |
| 41 | 6 | 0 | 0.158006 | -0.68661 | -2.08406 |
| 42 | 1 | 0 | -10.2957 | -1.49898 | -0.57265 |
| 43 | 1 | 0 | -10.5363 | -0.79124 | -2.16642 |
| 44 | 1 | 0 | -9.19976 | -2.58616 | -3.20544 |
| 45 | 1 | 0 | -8.2817  | -4.43353 | -1.88903 |
| 46 | 1 | 0 | -8.89867 | -3.73512 | -0.39838 |
| 47 | 1 | 0 | -8.76571 | 0.425947 | -0.93964 |
| 48 | 1 | 0 | -8.13461 | -0.29874 | -2.41097 |
| 49 | 1 | 0 | -6.4211  | -3.78868 | 0.43759  |
| 50 | 1 | 0 | -5.8662  | -4.36545 | -1.11754 |
| 51 | 1 | 0 | -3.88803 | -3.15381 | -0.33653 |
| 52 | 1 | 0 | -5.01315 | 2.569665 | 0.144838 |
| 53 | 1 | 0 | -4.45122 | 2.088681 | -1.4438  |
| 54 | 1 | 0 | -6.94861 | 1.427133 | -0.72096 |
| 55 | 1 | 0 | -1.87425 | -1.85816 | -0.91861 |
| 56 | 1 | 0 | -2.21346 | -1.46045 | 0.765139 |
| 57 | 1 | 0 | 2.006627 | 2.846972 | 3.226109 |
| 58 | 1 | 0 | -8.05996 | -0.38756 | 1.280805 |
| 59 | 1 | 0 | -7.03063 | -1.80369 | 1.491825 |
| 60 | 1 | 0 | -8.72045 | -2.00841 | 1.017798 |
| 61 | 1 | 0 | -11.4291 | -3.08318 | -2.68136 |
| 62 | 1 | 0 | -3.30665 | 3.719139 | 1.209671 |
| 63 | 1 | 0 | -1.76207 | 4.41837  | 1.718105 |
| 64 | 1 | 0 | -2.13596 | 4.249428 | -0.00663 |
| 65 | 1 | 0 | 3.87193  | 2.834148 | 1.563895 |
| 66 | 1 | 0 | 2.722375 | 2.968196 | 0.223947 |
| 67 | 1 | 0 | 2.876819 | 4.289814 | 1.390461 |
| 68 | 1 | 0 | 3.326575 | 0.498265 | 1.114843 |
| 69 | 1 | 0 | 4.506679 | -0.31677 | 3.155876 |
| 70 | 1 | 0 | 3.967954 | 1.348031 | 3.394359 |
| 71 | 1 | 0 | 3.066282 | 0.017587 | 4.134031 |

|    |   |   |          |          |          |
|----|---|---|----------|----------|----------|
| 72 | 1 | 0 | 3.279797 | -1.91264 | 1.712684 |
| 73 | 1 | 0 | 1.784371 | -1.46079 | 0.871196 |
| 74 | 1 | 0 | 1.77362  | -1.67267 | 2.621113 |
| 75 | 1 | 0 | 0.016629 | 1.314759 | 3.303655 |
| 76 | 1 | 0 | -4.85373 | 0.089901 | 1.785179 |
| 77 | 1 | 0 | -3.12485 | 0.044411 | 2.140063 |
| 78 | 1 | 0 | -4.00039 | 1.576835 | 2.193962 |
| 79 | 1 | 0 | 0.843088 | -1.05072 | -1.31057 |
| 80 | 1 | 0 | -0.42371 | -1.53198 | -2.47255 |
| 81 | 1 | 0 | 0.734809 | -0.25432 | -2.90516 |

### 3. Spectral information of 1

#### 3.1 HR-ESI-MS and UV (CH<sub>3</sub>OH) spectrum of 1

LXZ-33 B8G12B3F2C #45 RT: 0.43 AV: 1 NL: 4.48E7  
T: FTMS + p ESI/Full ms [100.0000-1000.0000]

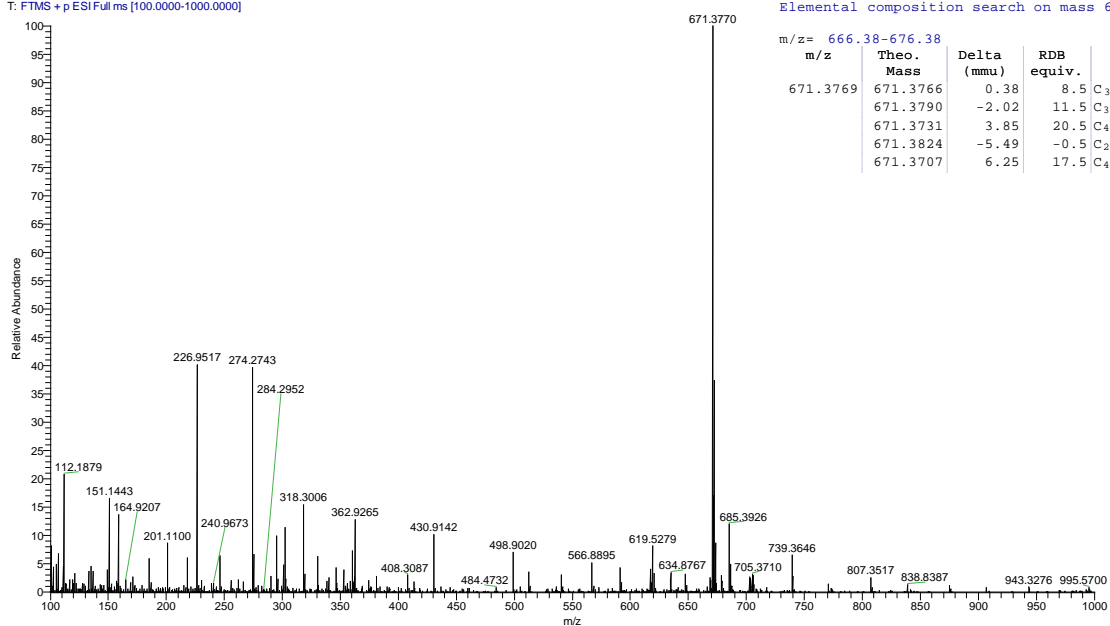

Elemental composition search on mass 671.38

| m/z      | Theo. Mass | Delta (mmu) | RDB equiv. | Composition                                        |
|----------|------------|-------------|------------|----------------------------------------------------|
| 671.3769 | 671.3766   | 0.38        | 8.5        | C <sub>36</sub> H <sub>56</sub> O <sub>10</sub> Na |
| 671.3790 | 671.3790   | -2.02       | 11.5       | C <sub>38</sub> H <sub>55</sub> O <sub>10</sub>    |
| 671.3731 | 671.3731   | 3.85        | 20.5       | C <sub>45</sub> H <sub>51</sub> O <sub>5</sub>     |
| 671.3824 | 671.3824   | -5.49       | -0.5       | C <sub>29</sub> H <sub>60</sub> O <sub>15</sub> Na |
| 671.3707 | 671.3707   | 6.25        | 17.5       | C <sub>43</sub> H <sub>52</sub> O <sub>5</sub> Na  |

HR-ESI-MS of compound 1

# Spectrum Peak Pick Report

2018-01-09 01:21:10

Data Set: B8G12B3F2C - RawData

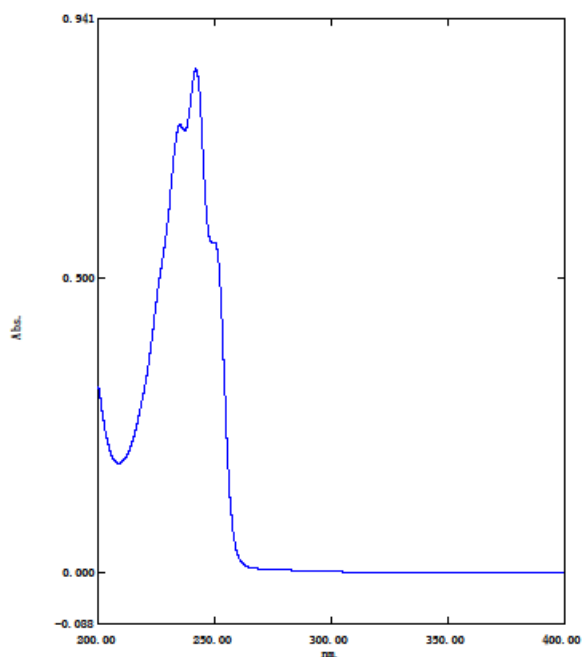

[Measurement Properties]  
Wavelength Range (nm.): 200.00 to 400.00  
Scan Speed: Medium  
Sampling Interval: 0.2  
Auto Sampling Interval: Disabled  
Scan Mode: Auto

[Instrument Properties]  
Instrument Type: UV-2600 Series  
Measuring Mode: Absorbance  
Slit Width: 2.0  
Accumulation time: 0.1 sec.  
Light Source Change Wavelength: 323.0 nm  
Detector Unit: Direct  
S/R Exchange: Normal  
Stair Correction: Off

[Attachment Properties]  
Attachment: None

[Operation]  
Threshold: 0.0010000  
Points: 5  
InterPolate: Disabled  
Average: Disabled

[Sample Preparation Properties]  
Weight:  
Volume:  
Dilution:  
Path length:  
Addition: Member:

| No. | P/V | Wavelength(nm) | Absorbance | description |
|-----|-----|----------------|------------|-------------|
|-----|-----|----------------|------------|-------------|

UV spectrum of 1

### 3.2 1D and 2D NMR spectra of 1 in pyridine-d<sub>5</sub>

#### 3.2.1 <sup>1</sup>H NMR spectrum of 1 in pyridine-d<sub>5</sub>

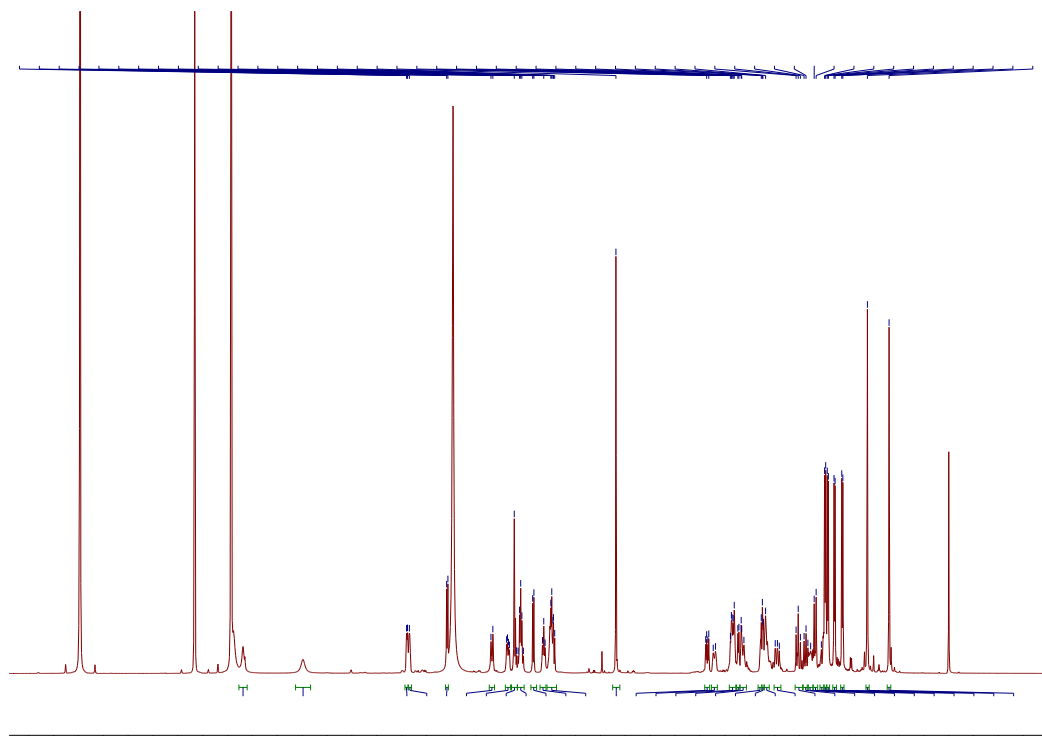

#### 3.2.2 <sup>13</sup>C NMR spectrum of 1 in pyridine-d<sub>5</sub>

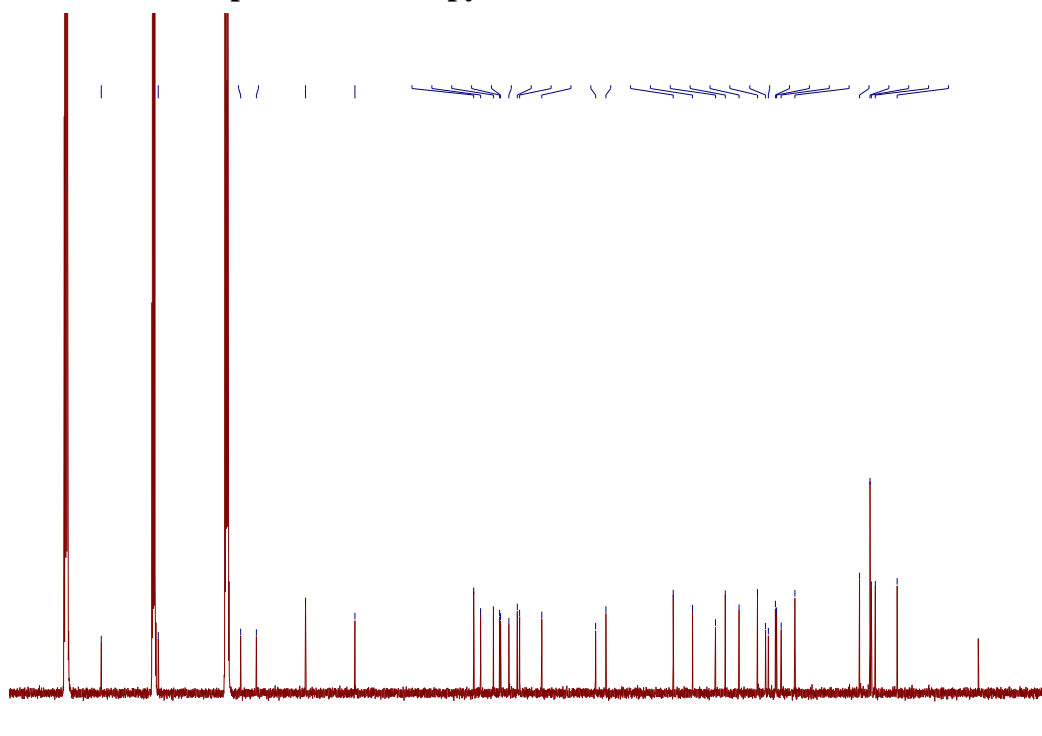

### 3.2.3 $^1\text{H}$ - $^1\text{H}$ COSY spectrum of 1 in pyridine- $\text{d}_5$

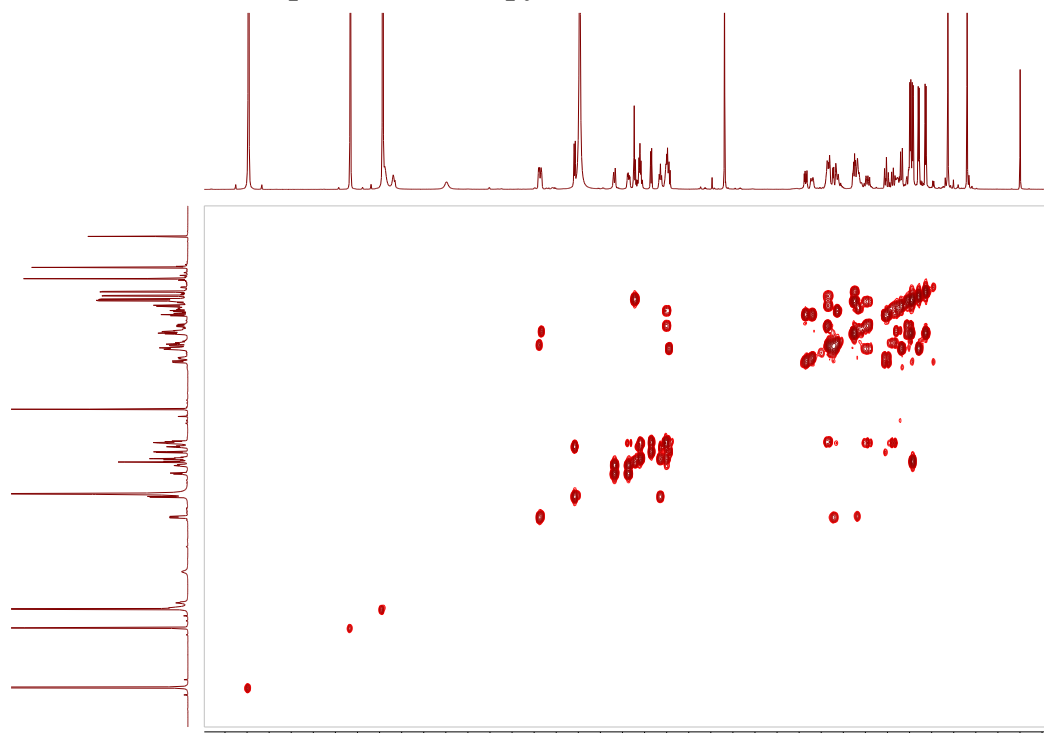

### 3.2.4 HSQC spectrum of 1 in pyridine- $\text{d}_5$

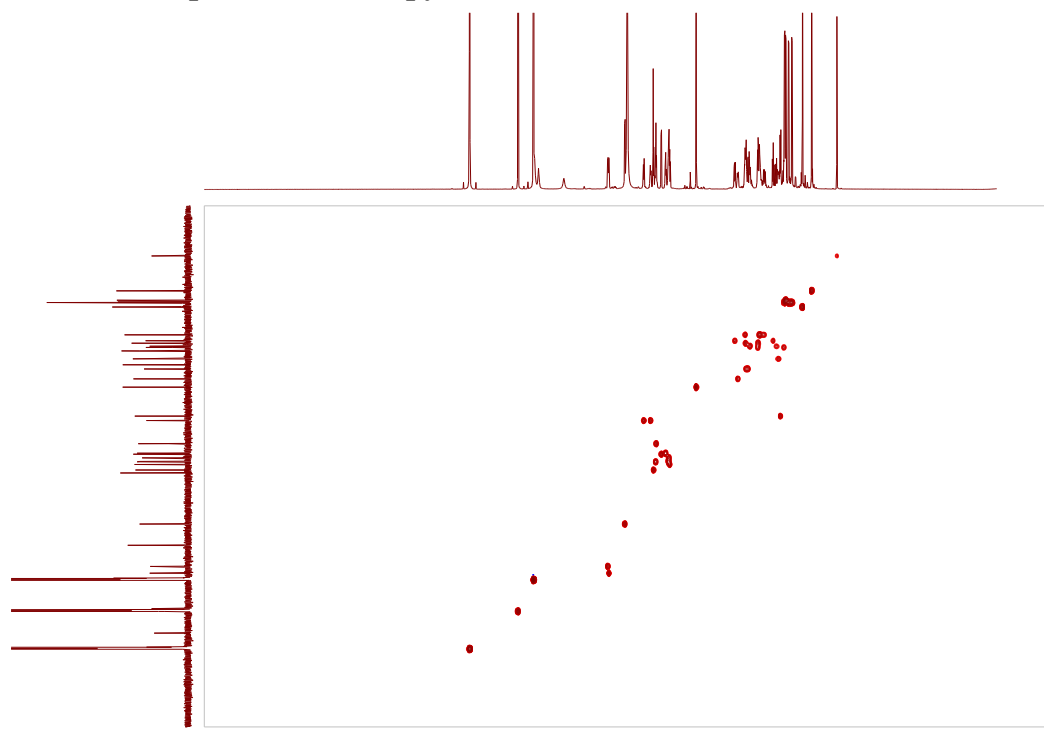

### 3.2.5 HMBC spectrum of 1 in pyridine-d<sub>5</sub>

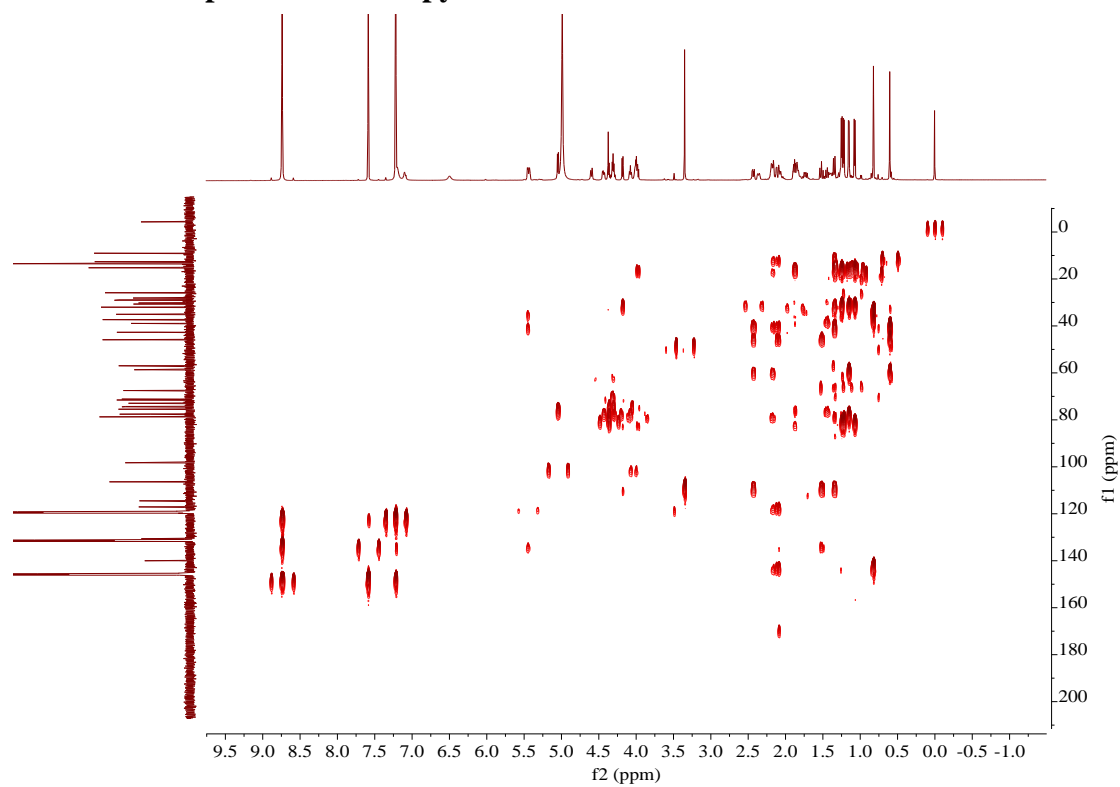

### 3.2.6 NOESY spectrum of 1 in pyridine-d<sub>5</sub>

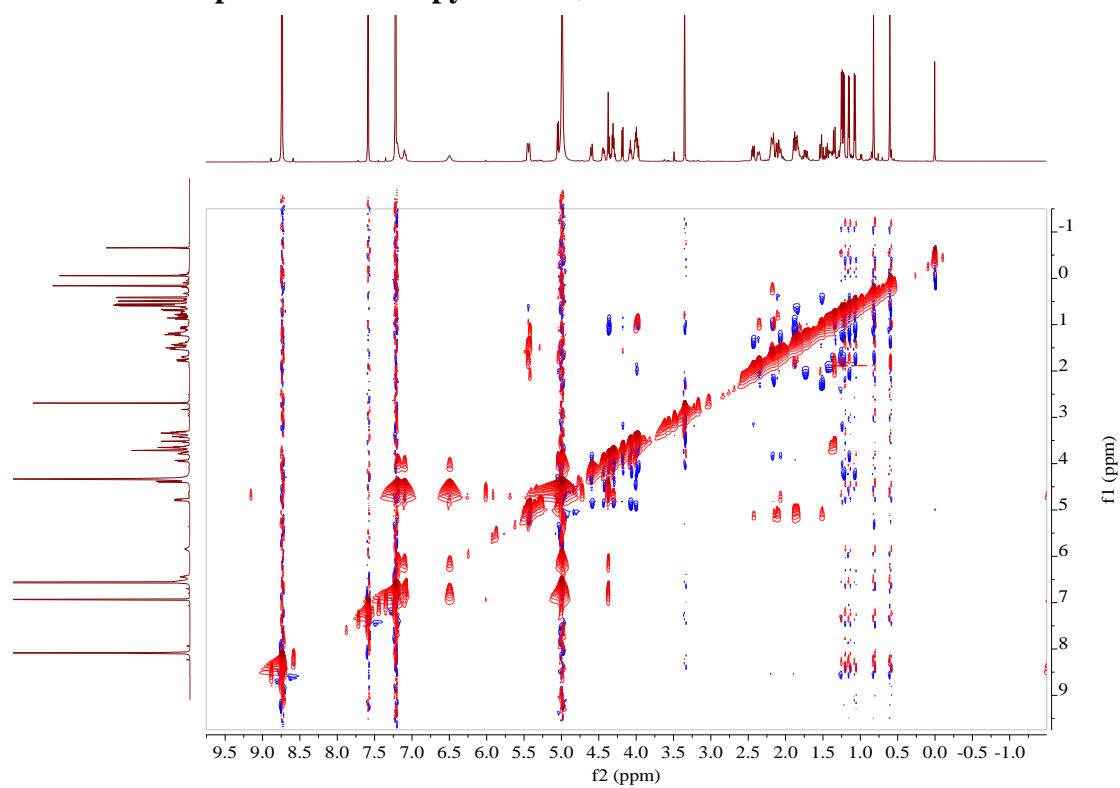

## 4. Spectral information of 2

### 4.1 HR-ESI-MS and UV (CH<sub>3</sub>OH) spectrum of 2

#### HR-ESI-MS and UV (CH<sub>3</sub>OH) spectrum of 2

LXZ-VA-60 #1470 RT: 15.19 AV: 1 NL: 1.46E6  
T: FTMS - p ESI Full ms [100.0000-1000.0000]

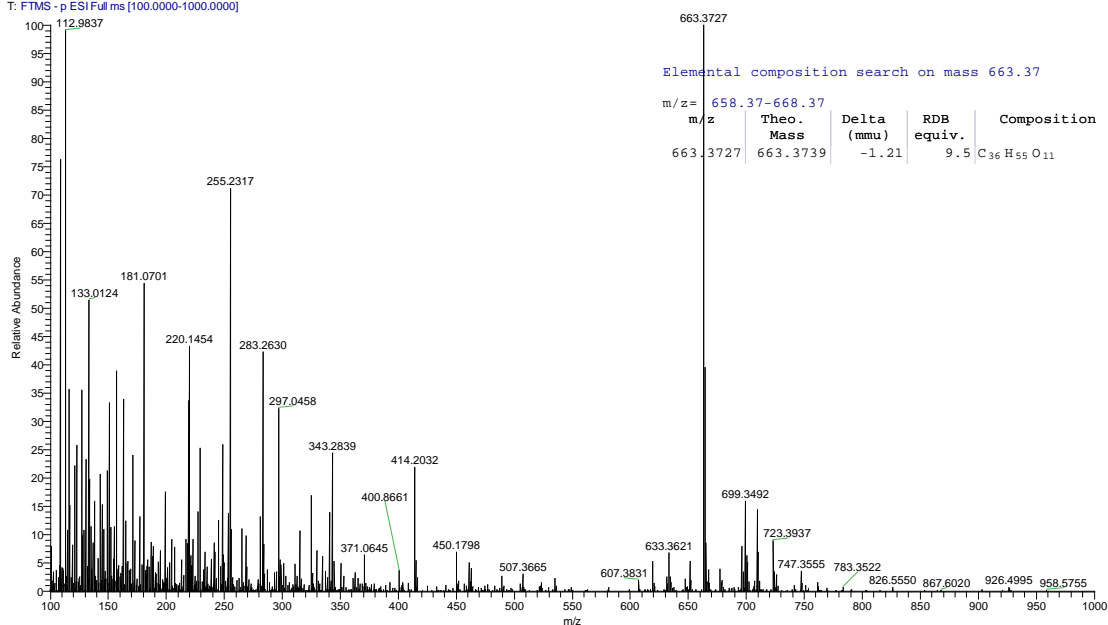

HR-ESI-MS of compound 2



## Spectrum Peak Pick Report

2019-11-07 19:58:30

Data Set: VA-60 0.0233 mg ml - RawData

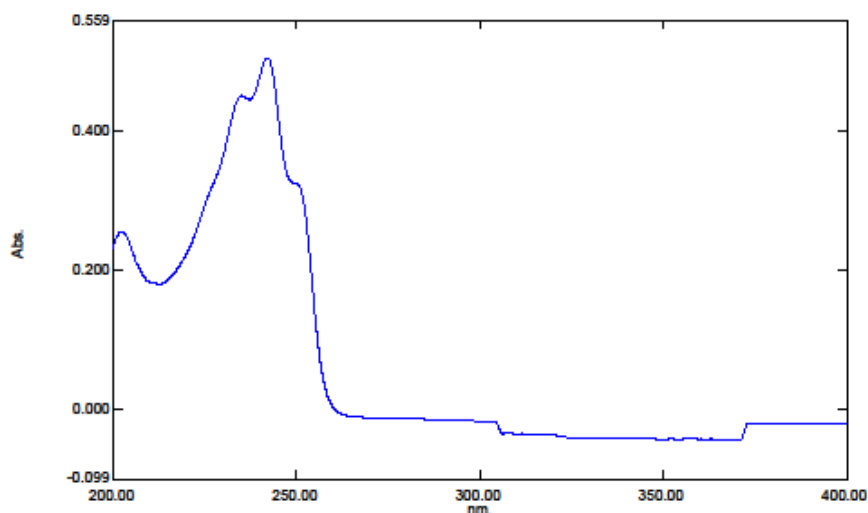

[Measurement Properties]  
Wavelength Range (nm.): 200.00 to 400.00  
Scan Speed: Medium  
Sampling Interval: 0.5  
Auto Sampling Interval: Disabled  
Scan Mode: Auto

[Instrument Properties]  
Instrument Type: UV-2600 Series  
Measuring Mode: Absorbance  
Slit Width: 2.0  
Accumulation time: 0.1 sec.  
Light Source Change Wavelength: 323.0 nm  
Detector Unit: Direct  
S/R Exchange: Normal  
Stair Correction: OFF

[Attachment Properties]  
Attachment: None

[Operation]  
Threshold: 0.0010000  
Points: 4  
InterPolate: Disabled  
Average: Disabled

[Sample Preparation Properties]  
Weight:  
.....

| No. | P/V | Wavelength | Abs.   | Description |
|-----|-----|------------|--------|-------------|
| 1   | 📍   | 373.00     | -0.020 |             |
| 2   | 📍   | 242.00     | 0.504  |             |
| 3   | 📍   | 235.00     | 0.450  |             |
| 4   | 📍   | 202.00     | 0.254  |             |
| 5   | 📍   | 367.00     | -0.044 |             |
| 6   | 📍   | 237.50     | 0.444  |             |
| 7   | 📍   | 212.50     | 0.180  |             |

UV spectrum of 2

## 4.2 1D and 2D NMR spectra of 2 in pyridine-d<sub>5</sub>

### 4.2.1 <sup>1</sup>H NMR spectrum of 2 in pyridine-d<sub>5</sub>

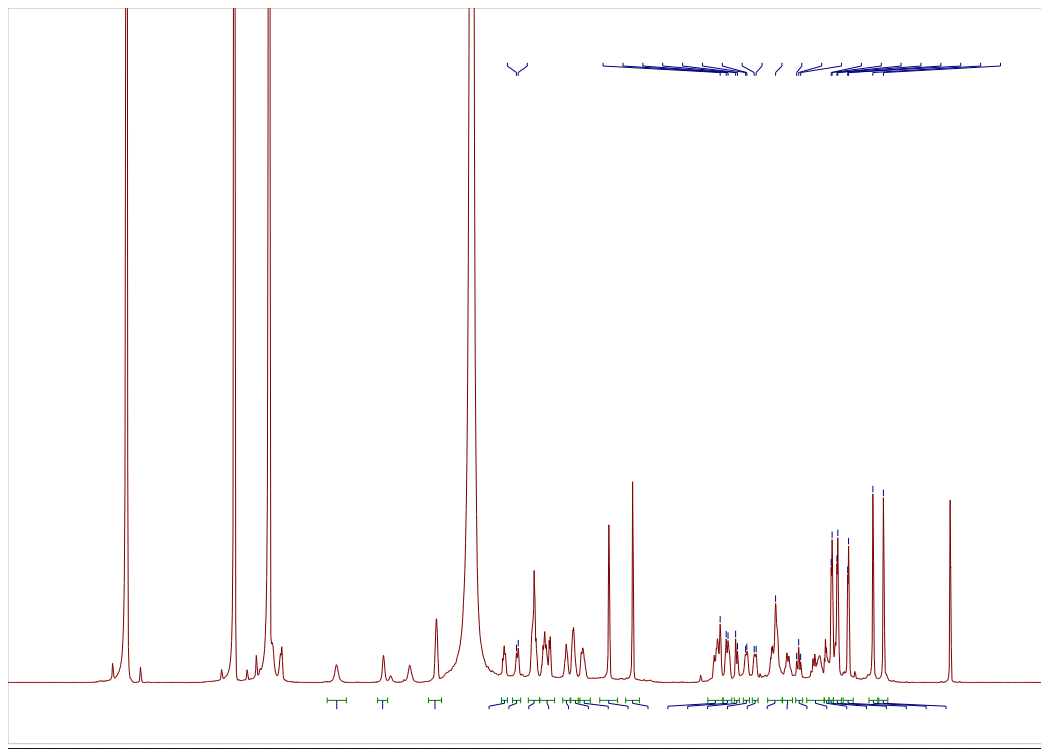

### 4.2.2 <sup>13</sup>C NMR spectrum of 2 in pyridine-d<sub>5</sub>

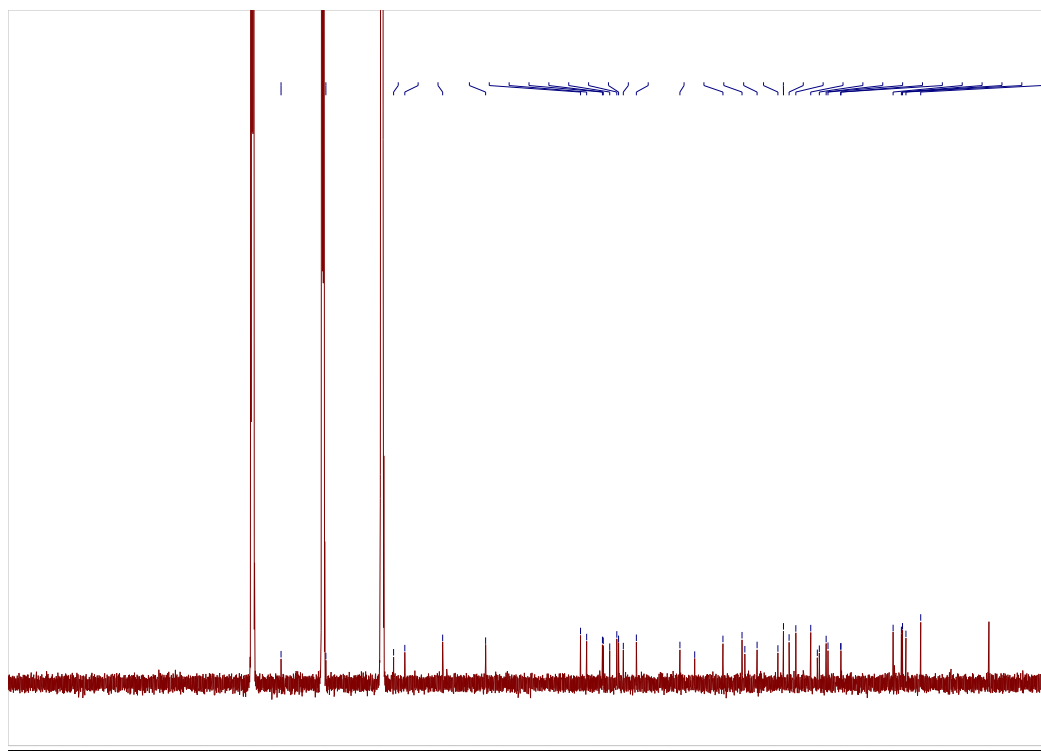

#### 4.2.3 DEPT-135 spectrum of 2 in pyridine-d<sub>5</sub>

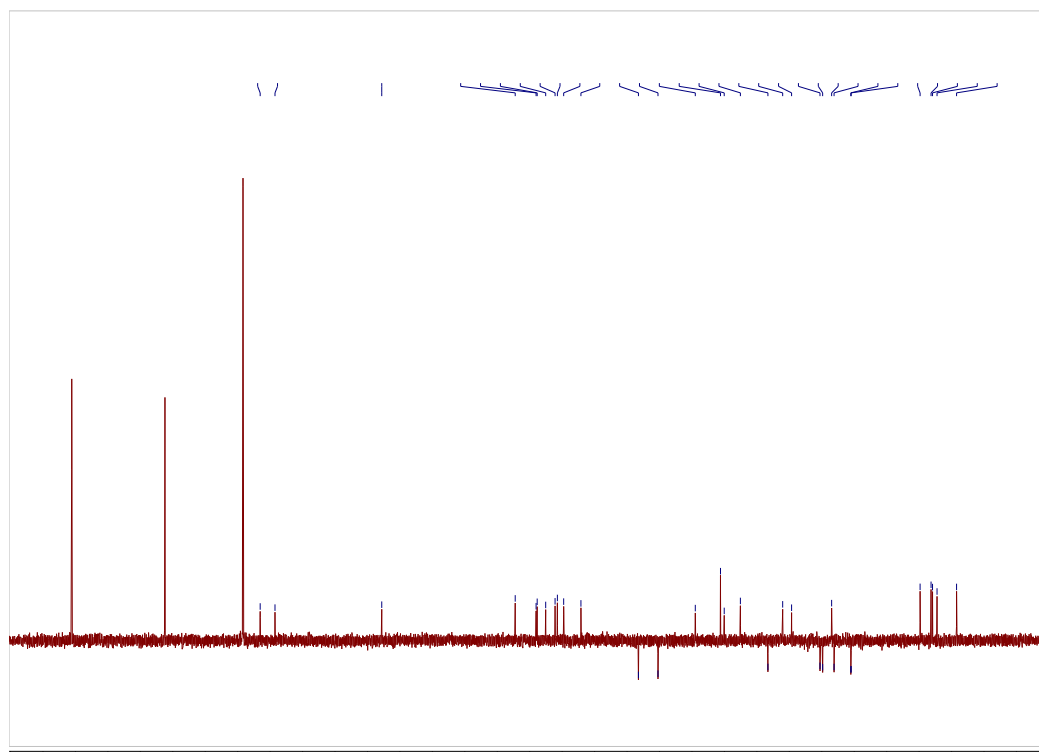

#### 4.2.4 <sup>1</sup>H-<sup>1</sup>H COSY spectrum of 2 in pyridine-d<sub>5</sub>

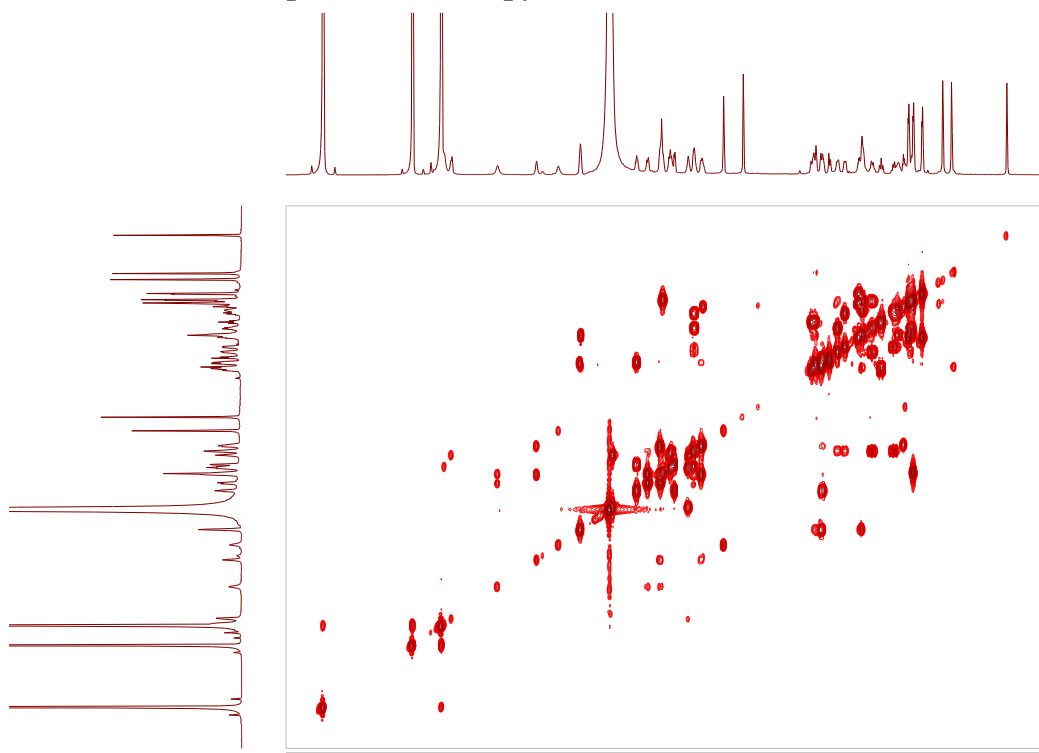

#### 4.2.5 HSQC spectrum of 2 in pyridine-d<sub>5</sub>

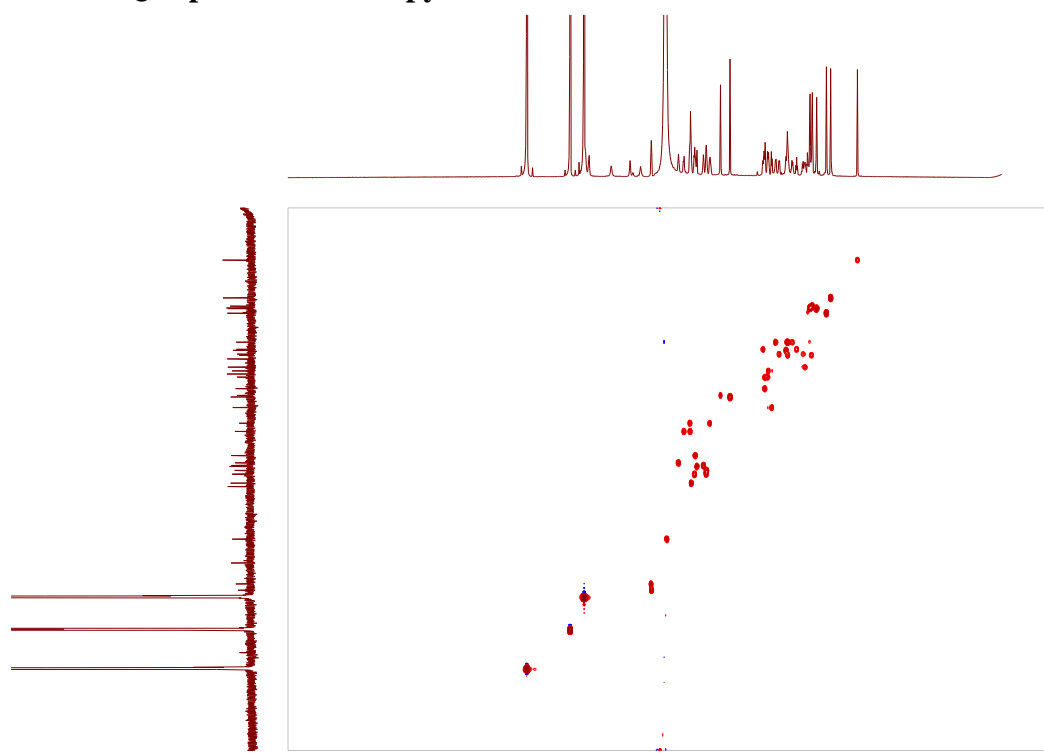

#### 4.2.6 HMBC spectrum of 2 in pyridine-d<sub>5</sub>

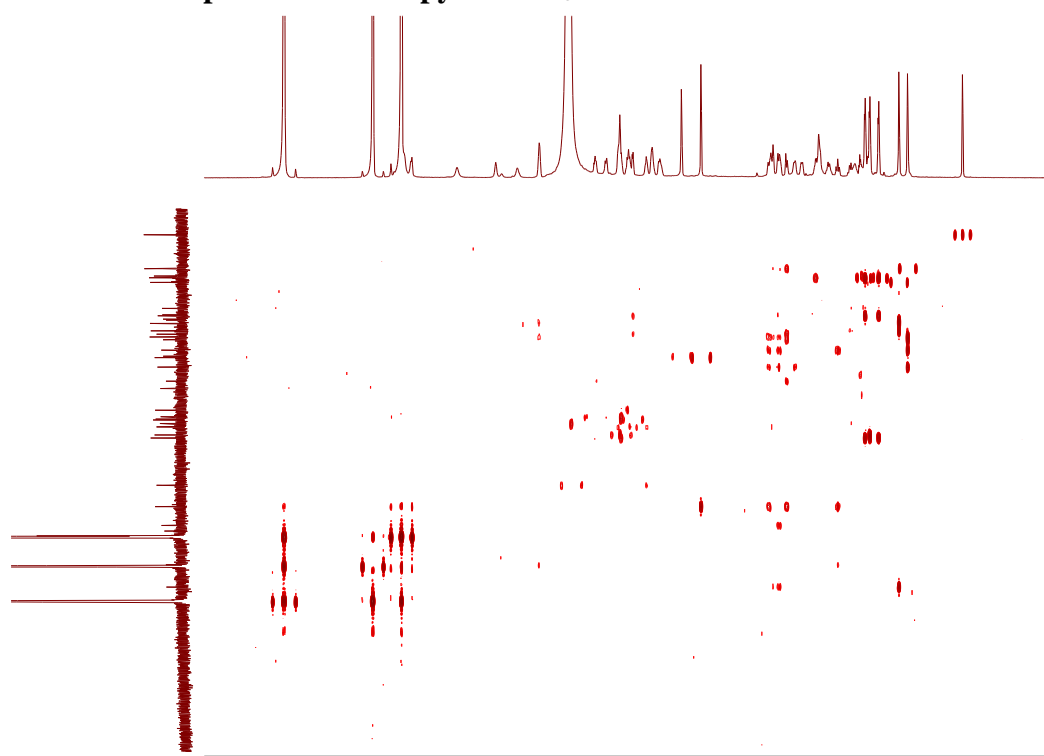

#### 4.2.7 NOESY spectrum of 2 in pyridine-d<sub>5</sub>

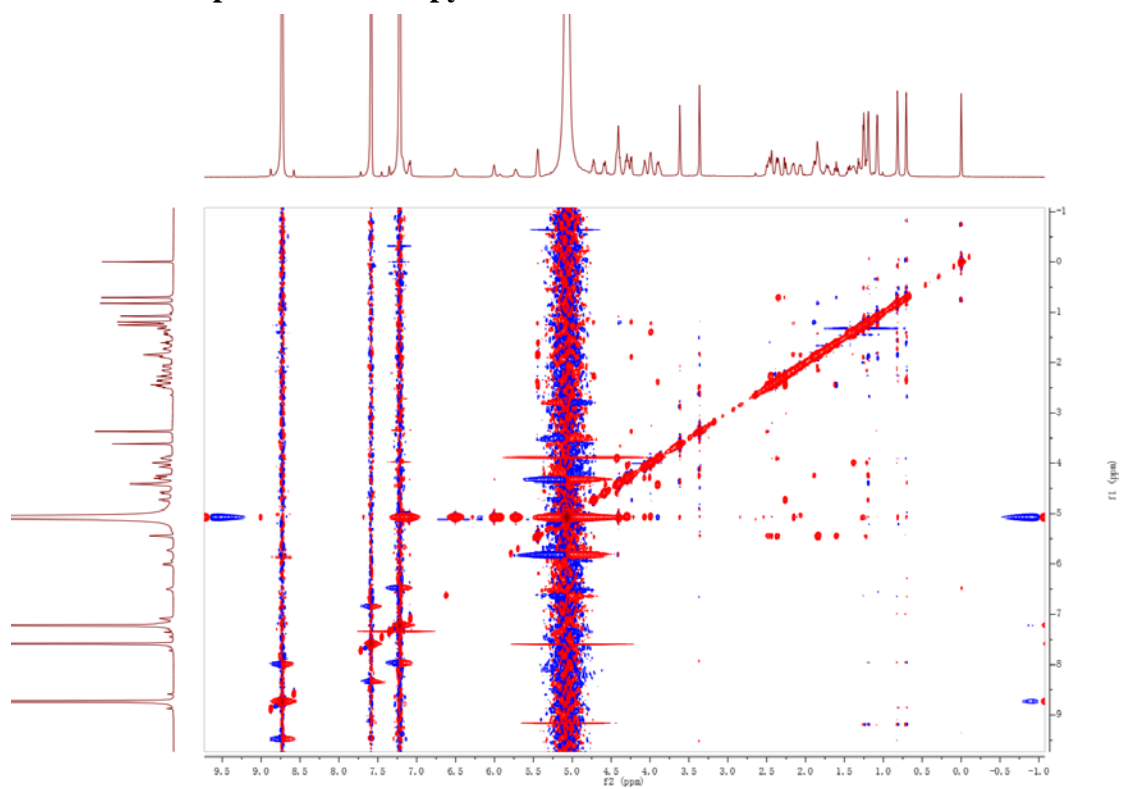

## 5. Spectral information of 3

### 5.1 HR-ESI-MS and UV (CH<sub>3</sub>OH) spectrum of 3

#### HR-ESI-MS and UV (CH<sub>3</sub>OH) spectrum of 3

B8G7B1B1 #35 RT: 0.33 AV: 1 NL: 2.05E8  
T: FTMS + p ESI Full ms [100.0000-1000.0000]

Elemental composition search on mass 717.38

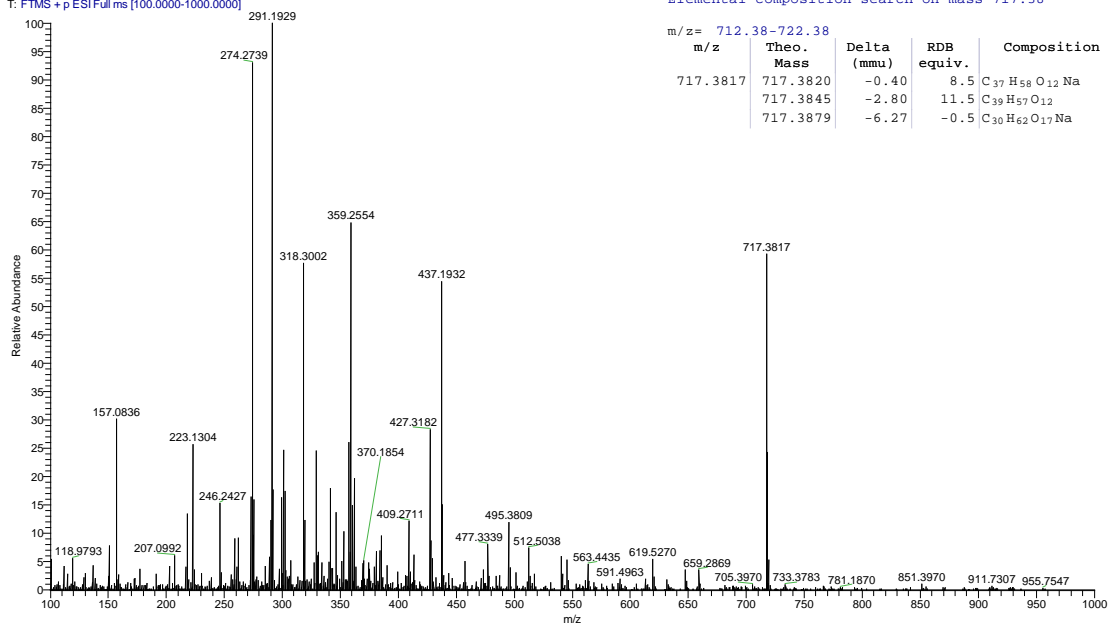

HR-ESI-MS of compound 3

## Spectrum Peak Pick Report

2019-05-08 21:24:34

Data Set: B8G7B1B1 0.0303 mg ml - RawData

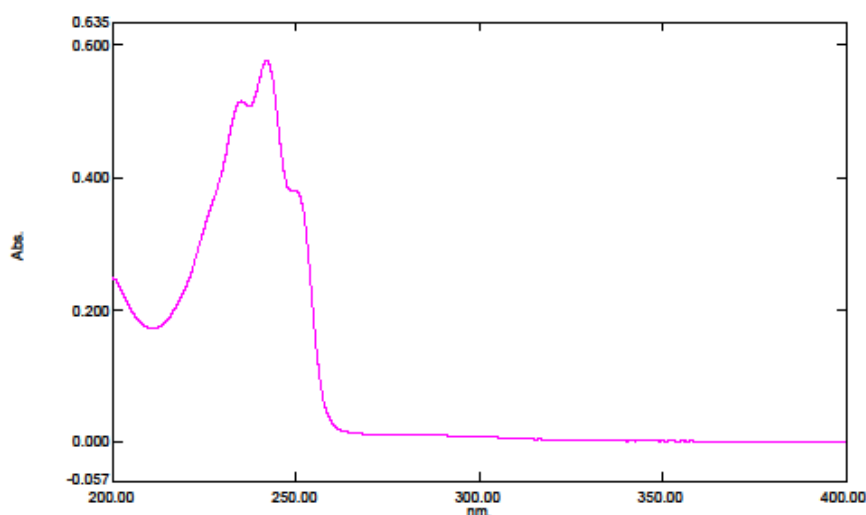

[Measurement Properties]  
Wavelength Range (nm.): 200.00 to 400.00  
Scan Speed: Medium  
Sampling Interval: 0.2  
Auto Sampling Interval: Enabled  
Scan Mode: Single

| No. | P/V | Wavelength | Abs.  | Description |
|-----|-----|------------|-------|-------------|
| 1   | 📍   | 329.80     | 0.004 |             |
| 2   | 📍   | 249.80     | 0.381 |             |
| 3   | 📍   | 242.00     | 0.578 |             |
| 4   | 📍   | 235.00     | 0.515 |             |

[Instrument Properties]  
Instrument Type: UV-2600 Series  
Measuring Mode: Absorbance  
Slit Width: 2.0  
Accumulation time: 0.1 sec.  
Light Source Change Wavelength: 323.0 nm  
Detector Unit: Direct  
S/R Exchange: Normal  
Stair Correction: OFF

[Attachment Properties]  
Attachment: None

[Operation]  
Threshold: 0.0010000  
Points: 4  
InterPolate: Disabled  
Average: Disabled

[Sample Preparation Properties]  
Weight:  
.....

Page 1 / 1

UV spectrum of 3

## 5.2 1D and 2D NMR spectra of 3 in pyridine-d<sub>5</sub>

### 5.2.1 <sup>1</sup>H NMR spectrum of 3 in pyridine-d<sub>5</sub>

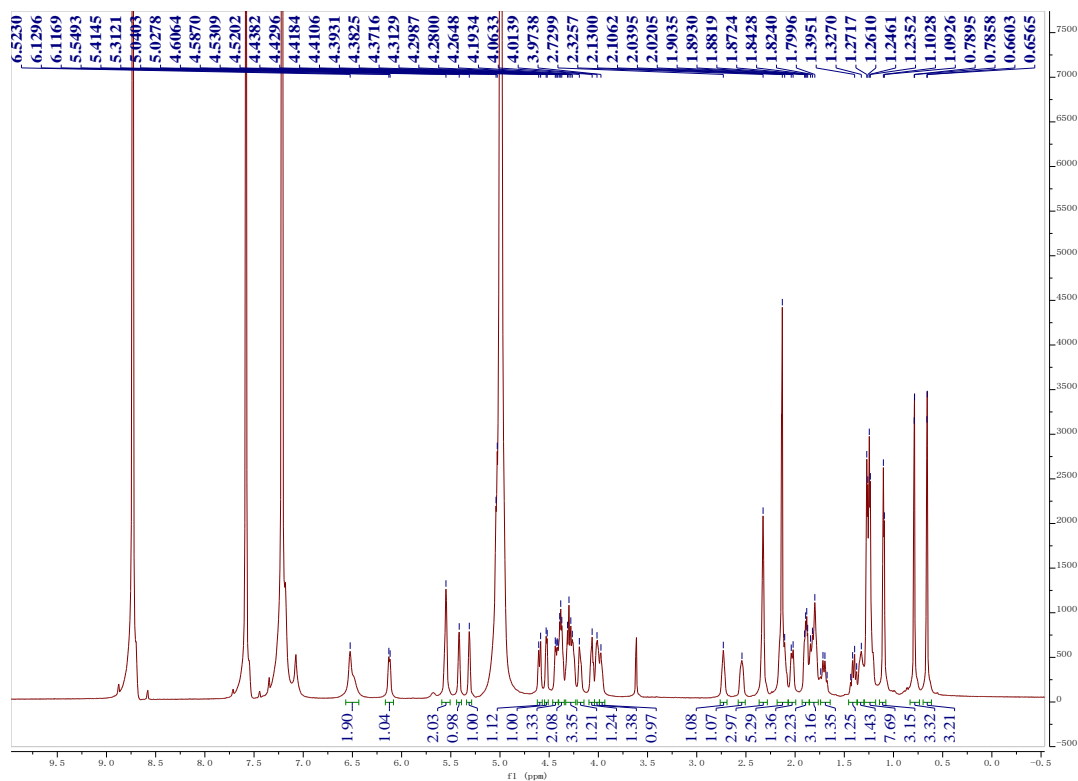

### 5.2.2 <sup>13</sup>C NMR spectrum of 3 in pyridine-d<sub>5</sub>

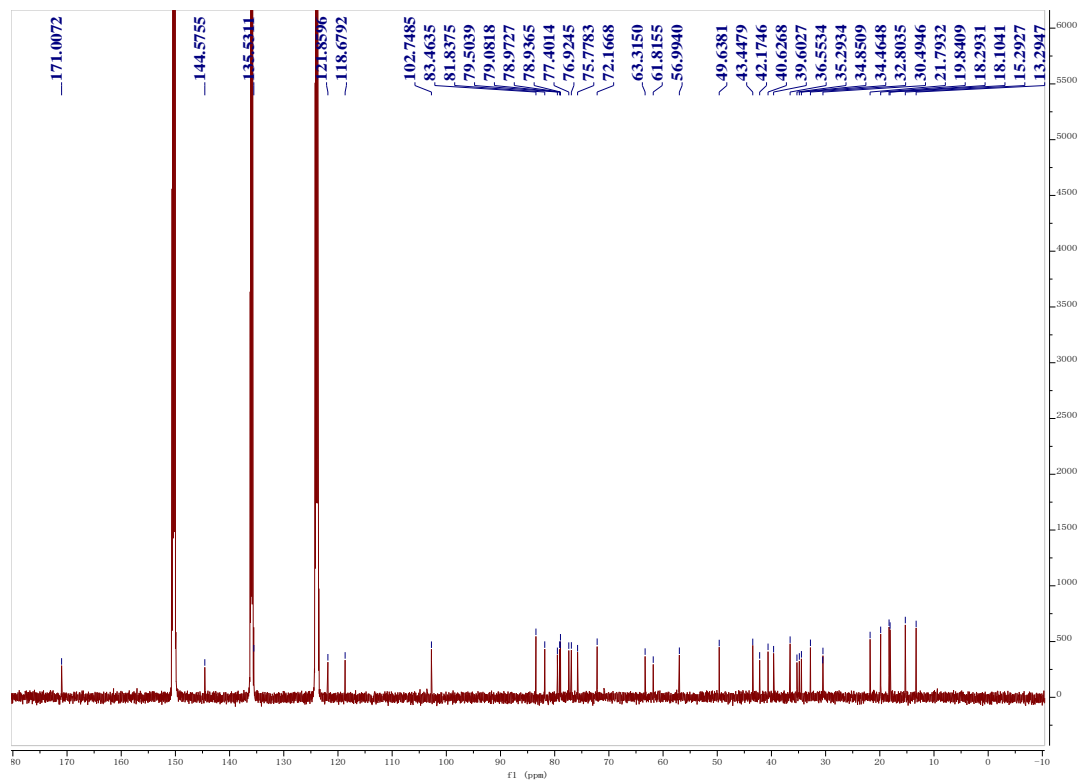



### 5.2.3 DEPT-135 spectrum of 3 in pyridine-d<sub>5</sub>

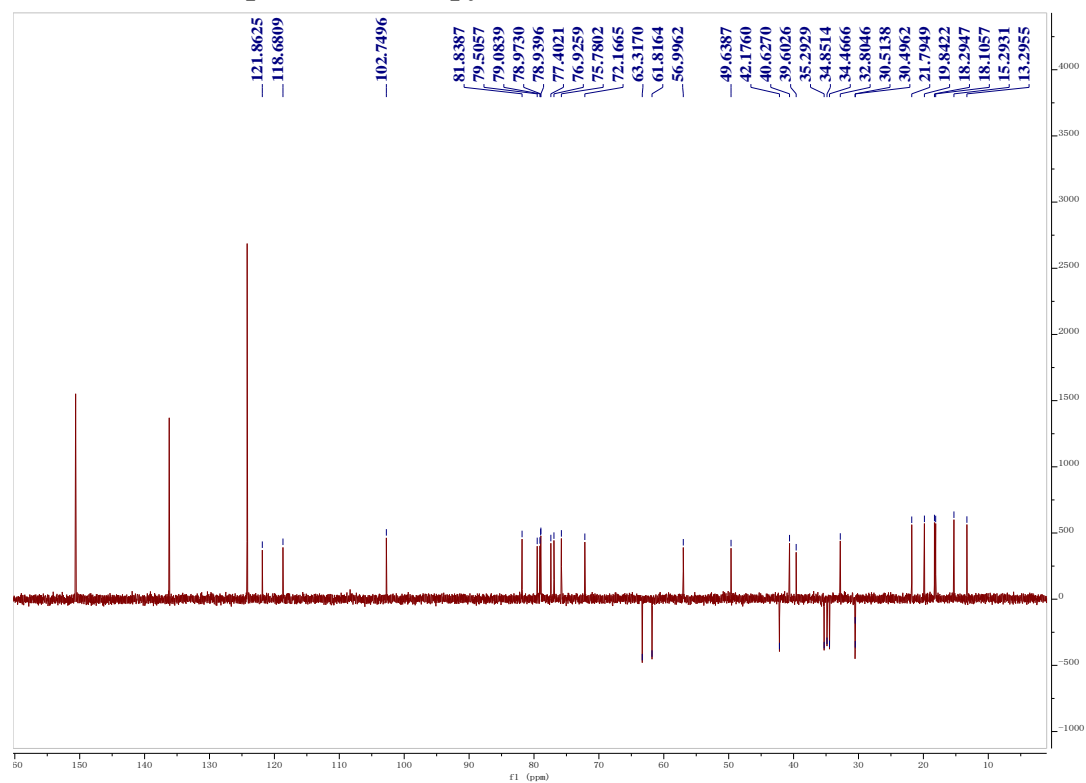

### 5.2.3 <sup>1</sup>H–<sup>1</sup>H COSY spectrum of 3 in pyridine-d<sub>5</sub>

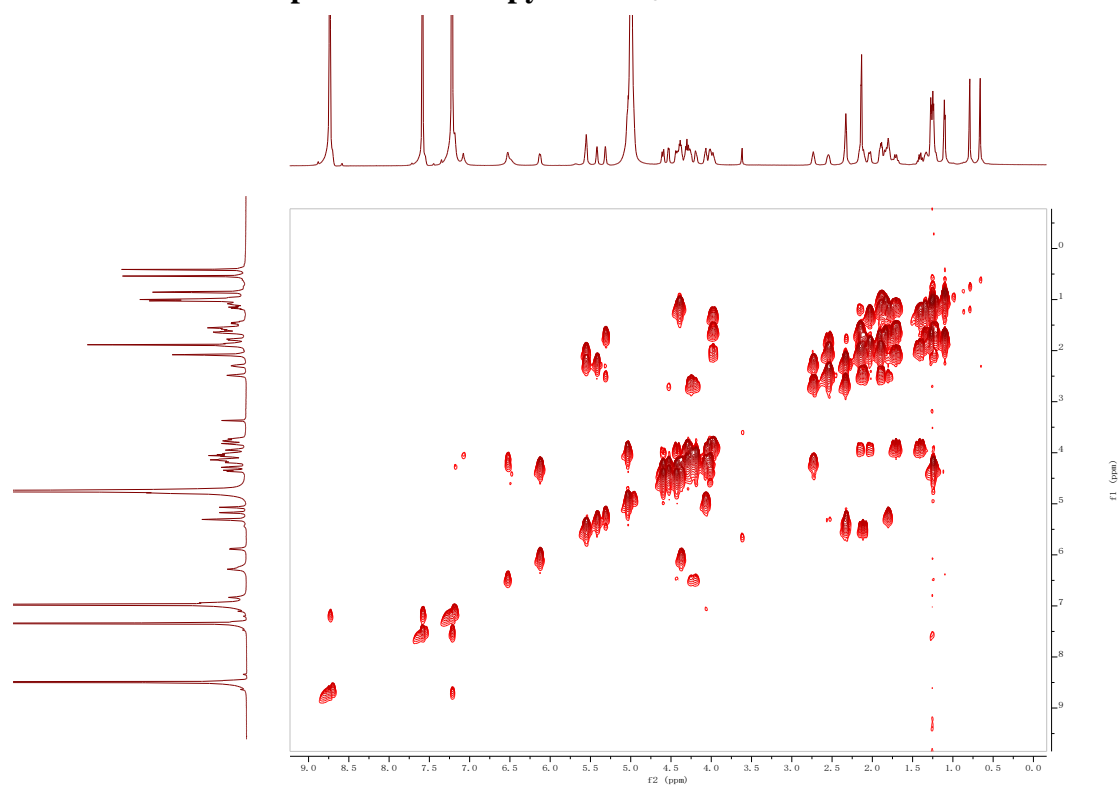

#### 5.2.4 HSQC spectrum of 3 in pyridine-d<sub>5</sub>

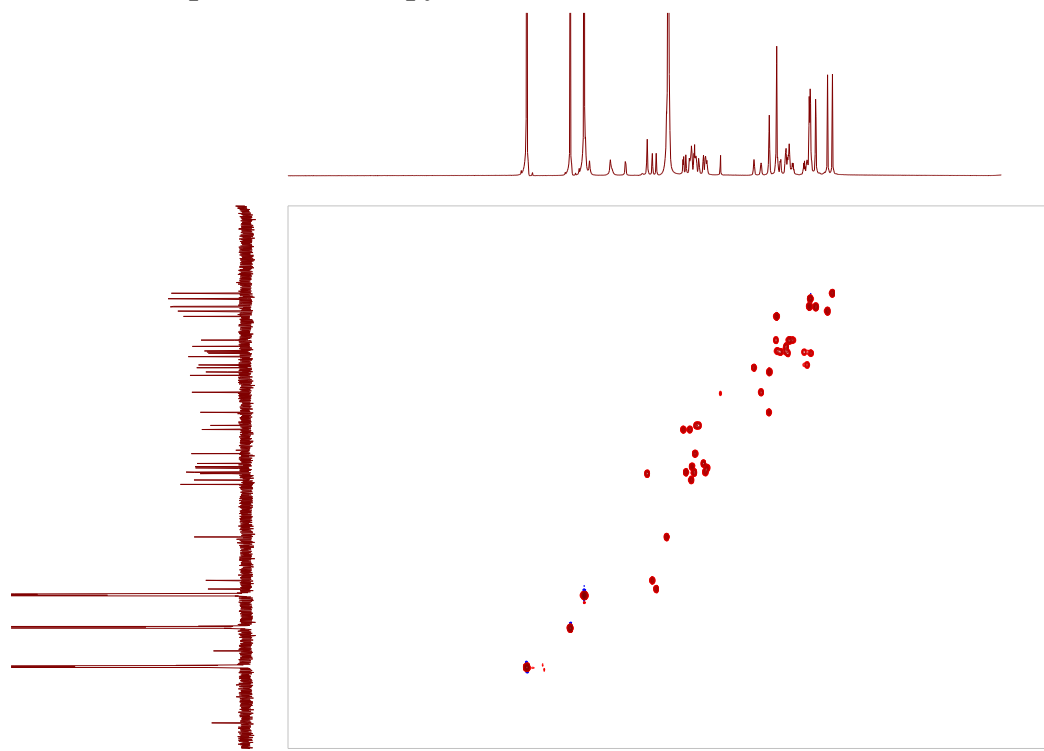

#### 5.2.5 HMBC spectrum of 3 in pyridine-d<sub>5</sub>

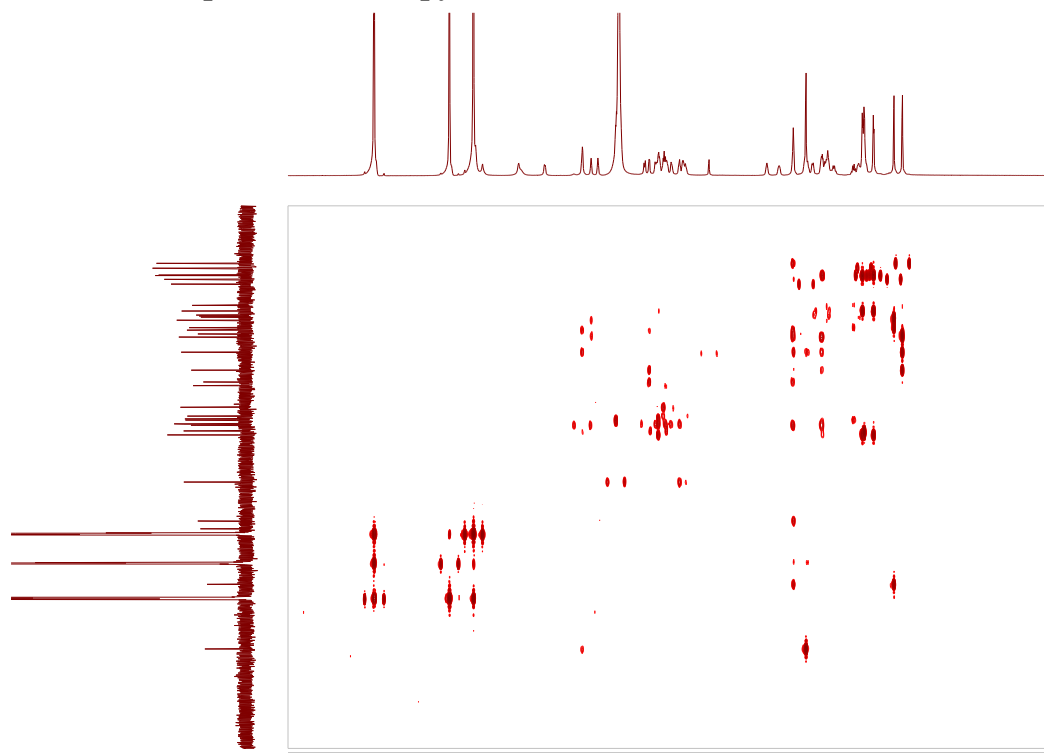

### 5.2.6 NOESY spectrum of 3 in pyridine-d<sub>5</sub>

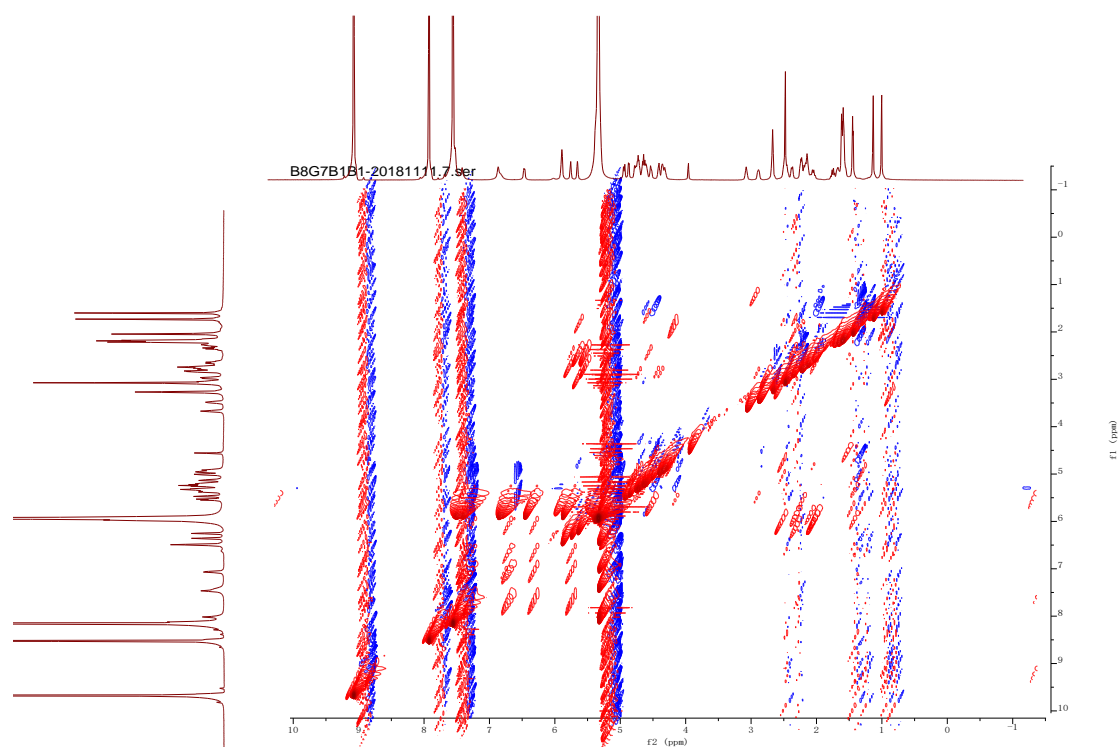

## 6. Spectral information of 4

### 6.1 HR-ESI-MS and UV (CH<sub>3</sub>OH) spectrum of 4

#### HR-ESI-MS, IR and UV (CH<sub>3</sub>OH) spectrum of 4

B8G8B2F\_170508152843 #62 RT: 0.28 AV: 1 NL: 3.16E6  
T: FTMS + p ESI Full ms [100.0000-1000.0000]

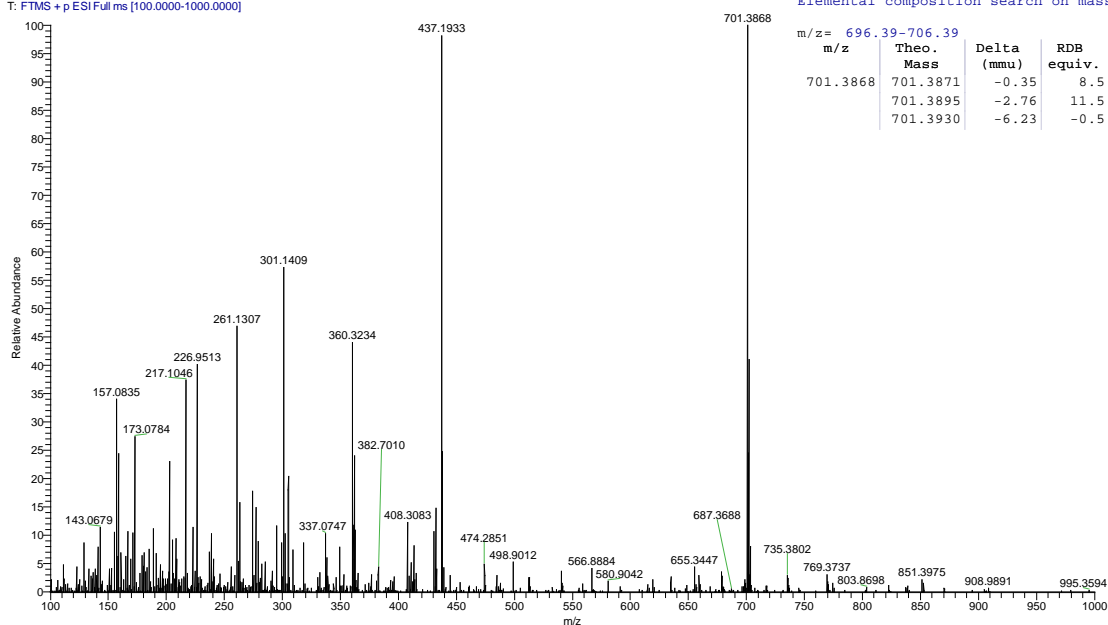

HR-ESI-MS of compound 4

# Spectrum Peak Pick Report

2017-06-21 22:08:13

Data Set: st\_220323 - RawData

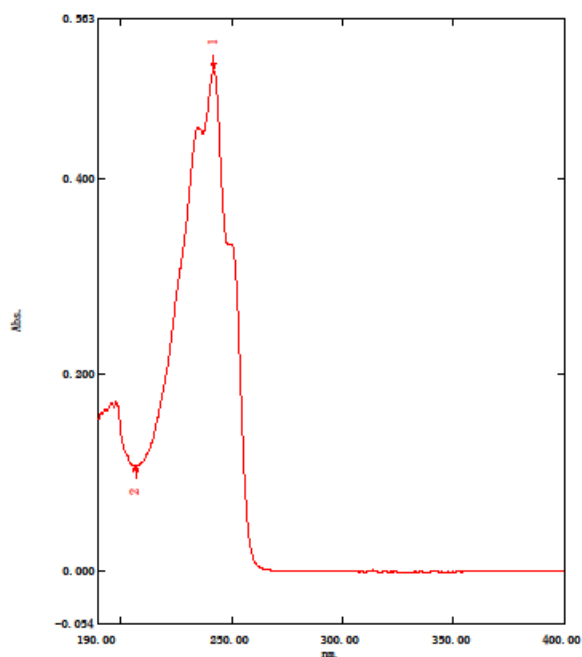

[Measurement Properties]  
Wavelength Range (nm.): 190.00 to 400.00  
Scan Speed: Medium  
Sampling Interval: 1.0  
Auto Sampling Interval: Disabled  
Scan Mode: Auto

[Instrument Properties]  
Instrument Type: UV-2600 Series  
Measuring Mode: Absorbance  
Slit Width: 2.0  
Accumulation time: 0.1 sec.  
Light Source Change Wavelength: 323.0 nm  
Detector Unit: Direct  
S/R Exchange: Normal  
Stair Correction: Off

[Attachment Properties]  
Attachment: None

[Operation]  
Threshold: 0.0010000  
Points: 5  
Interpolate: Disabled  
Average: Disabled

[Sample Preparation Properties]  
Weight:  
Volume:  
Dilution:  
Path length:  
Addition: Member:

| No. | P/V | Wavelength (nm) | Absorbance | description |
|-----|-----|-----------------|------------|-------------|
| 1   |     | 242.00          | 0.512      |             |
| 2   |     | 207.00          | 0.107      |             |

## UV spectrum of 4

## 6.2 1D and 2D NMR spectra of 4 in pyridine-d<sub>5</sub>

### 6.2.1 <sup>1</sup>H NMR spectrum of 4 in pyridine-d<sub>5</sub>

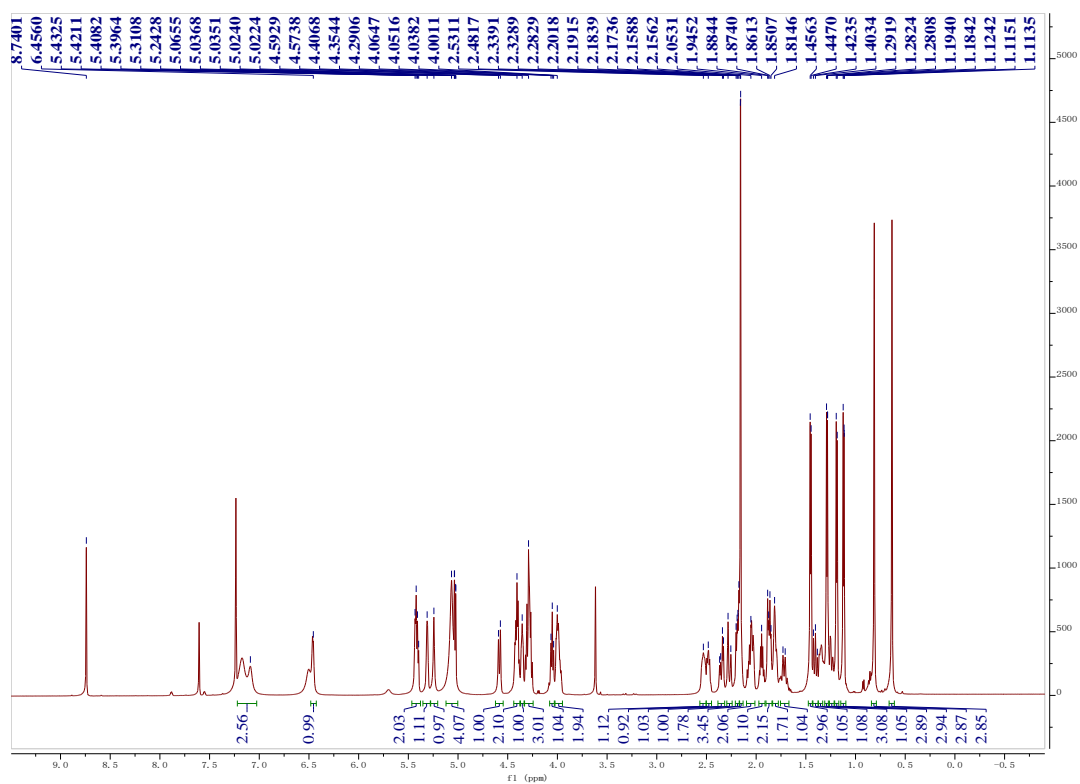

## 6.2.2 $^{13}\text{C}$ NMR spectrum of 4 in pyridine- $\text{d}_5$

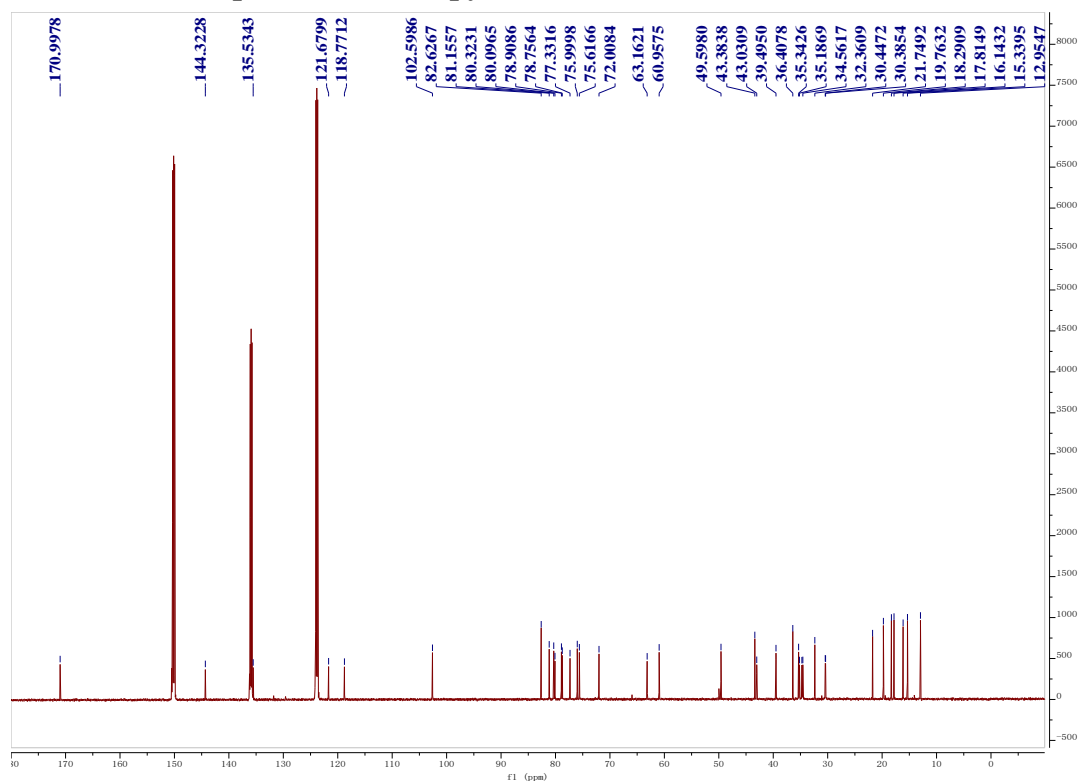

## 6.2.3 DEPT-135 spectrum of 4 in pyridine- $\text{d}_5$

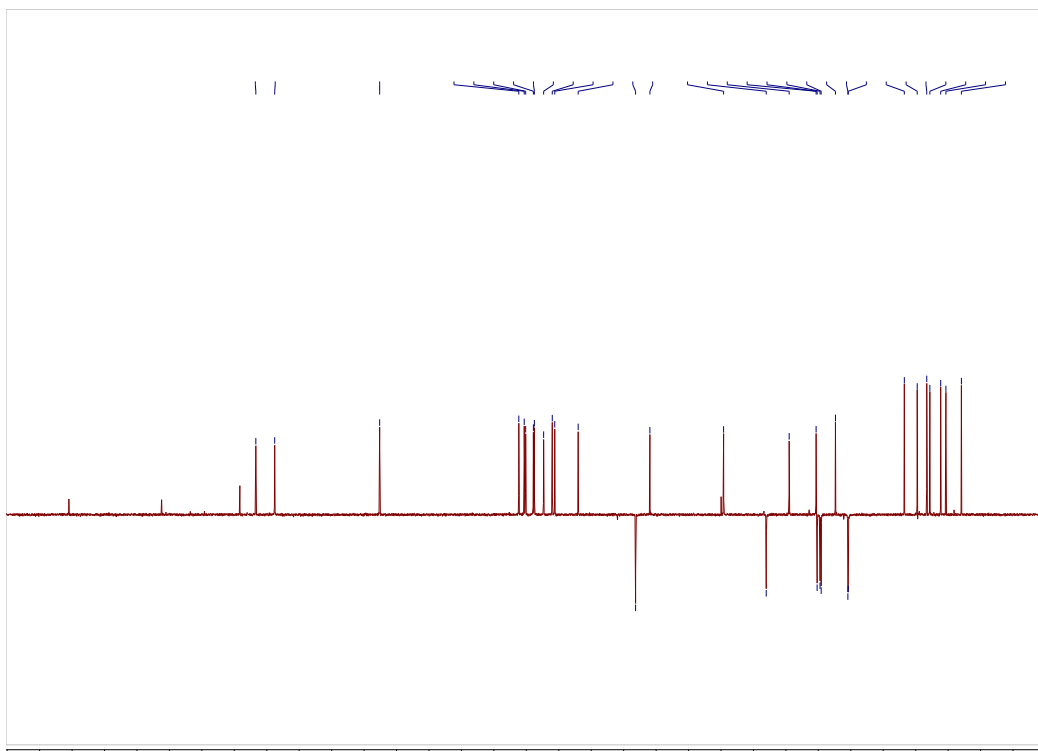

#### 6.2.4 $^1\text{H}$ - $^1\text{H}$ COSY spectrum of 4 in pyridine- $\text{d}_5$

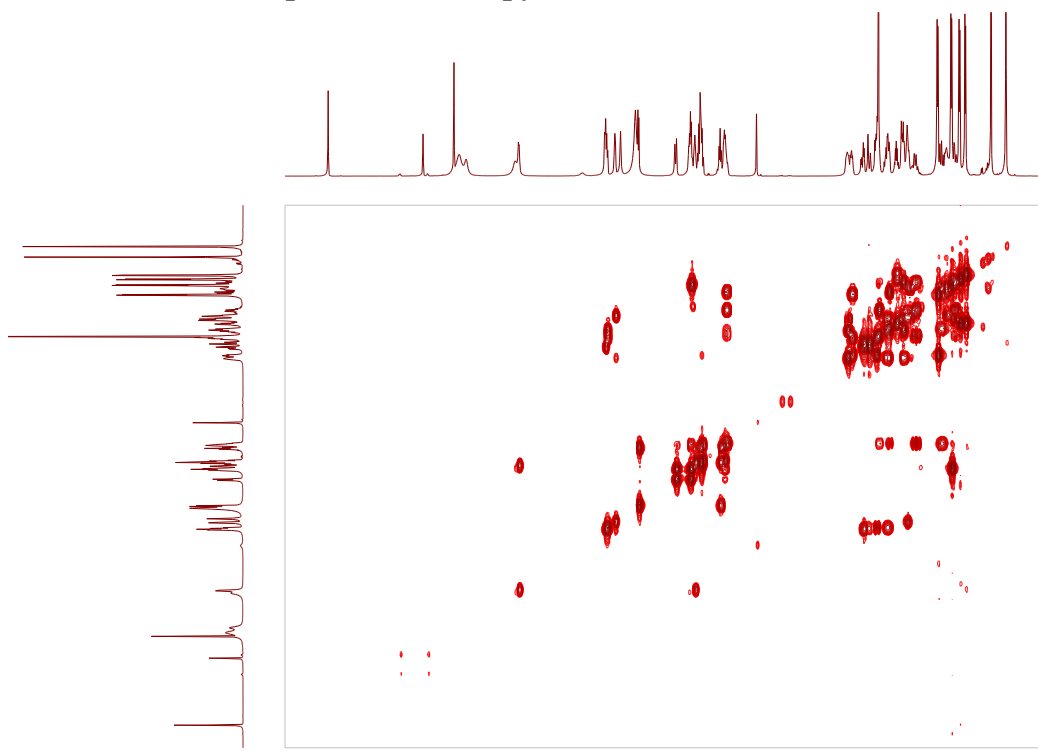

#### 6.2.5 HSQC spectrum of 4 in pyridine- $\text{d}_5$

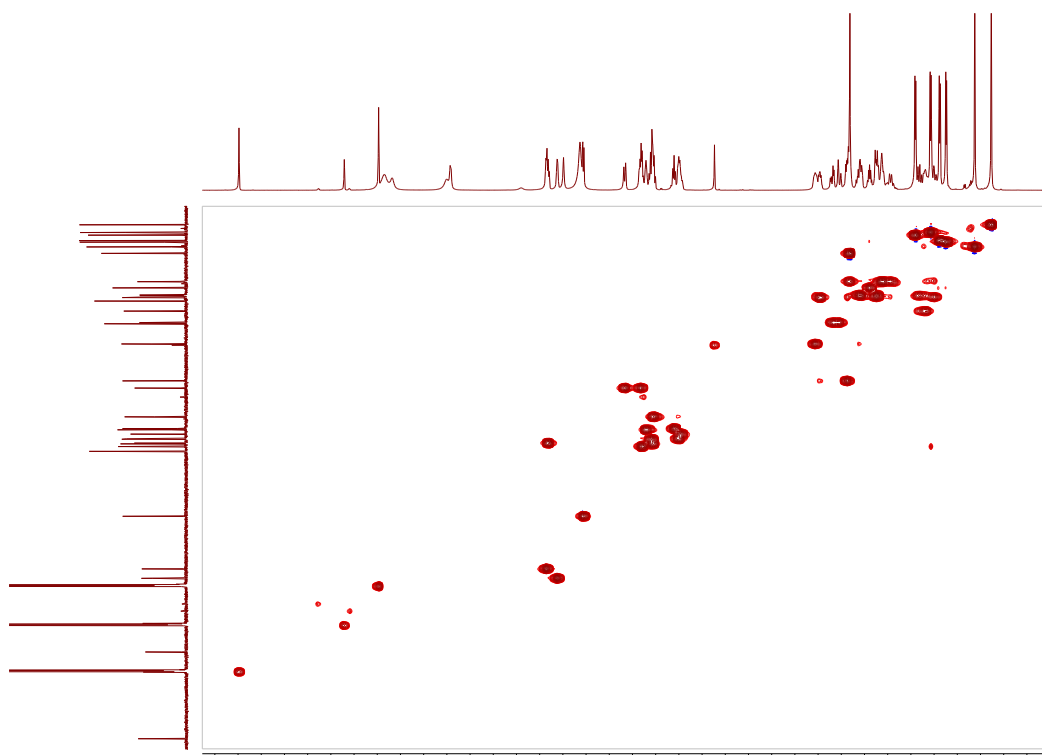

#### 6.2.6 HMBC spectrum of 4 in pyridine-d<sub>5</sub>

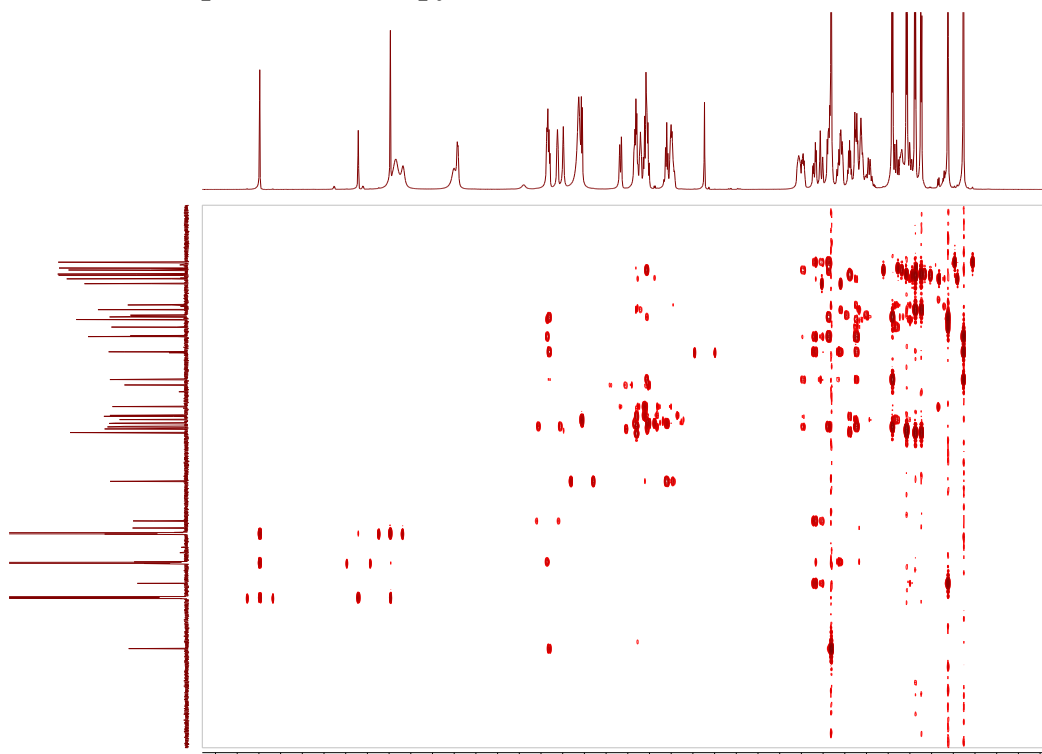

#### 6.2.7 NOESY spectrum of 4 in pyridine-d<sub>5</sub>



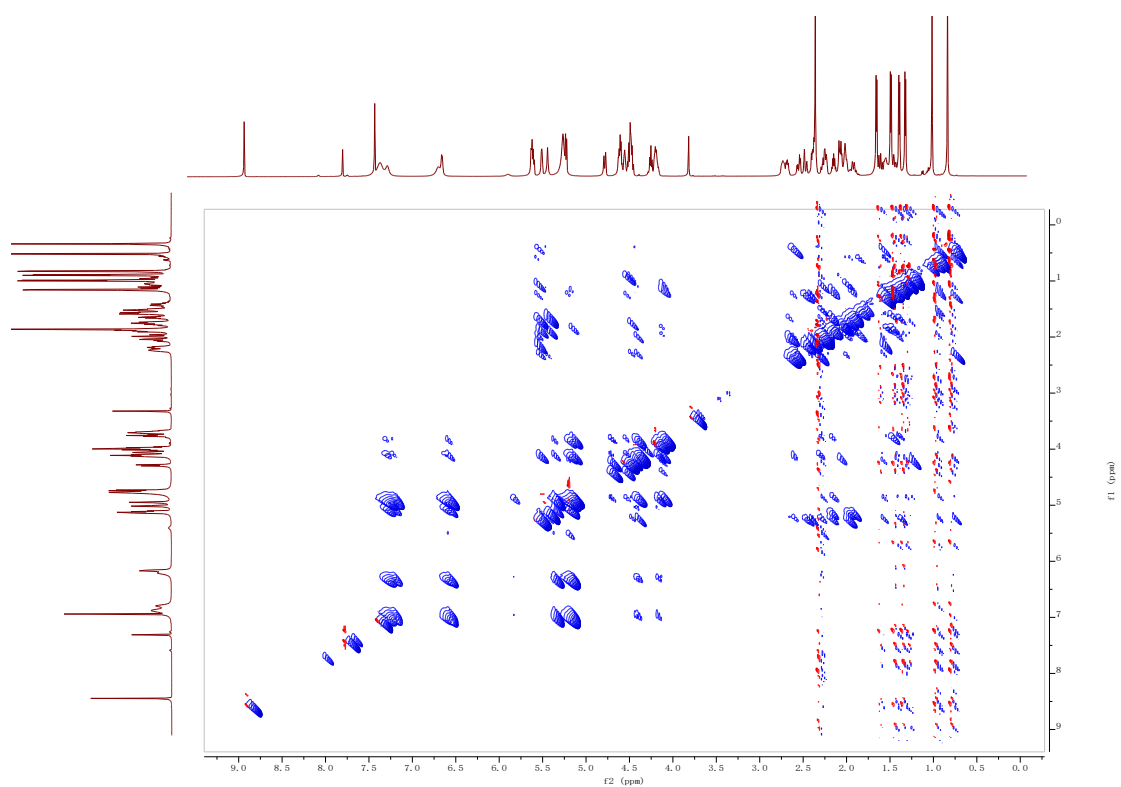

## 7. Spectral information of 5

### 7.1 HR-ESI-MS and UV (CH<sub>3</sub>OH) spectrum of 5

#### HR-ESI-MS and UV (CH<sub>3</sub>OH) spectrum of 5

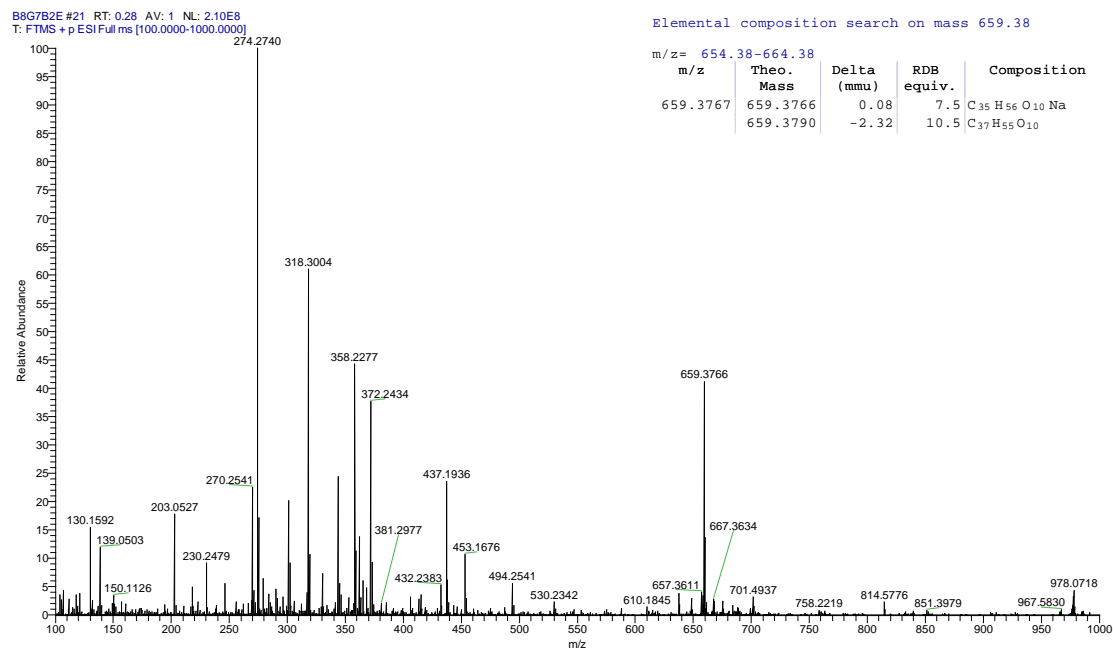

HR-ESI-MS of compound 5

## Spectrum Peak Pick Report

2019-05-08 20:42:14

Data Set: B8G7B2E1A 0.0296 mg ml - RawData

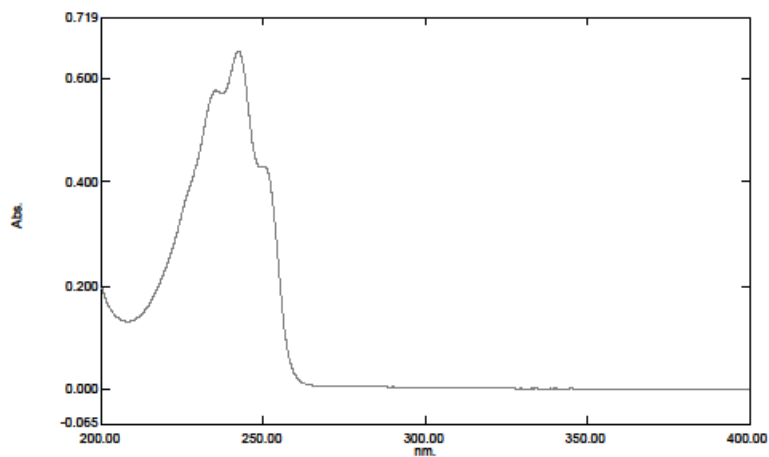

[Measurement Properties]  
Wavelength Range (nm.): 200.00 to 400.00  
Scan Speed: Medium  
Sampling Interval: 0.2  
Auto Sampling Interval: Enabled  
Scan Mode: Single

| No. | P/V | Wavelength | Abs.  | Description |
|-----|-----|------------|-------|-------------|
| 1   | ●   | 334.20     | 0.002 |             |
| 2   | ●   | 320.40     | 0.003 |             |
| 3   | ●   | 250.00     | 0.431 |             |
| 4   | ●   | 242.40     | 0.653 |             |
| 5   | ●   | 235.40     | 0.577 |             |

[Instrument Properties]  
Instrument Type: UV-2600 Series  
Measuring Mode: Absorbance  
Slit Width: 2.0  
Accumulation time: 0.1 sec.  
Light Source Change Wavelength: 323.0 nm  
Detector Unit: Direct  
S/R Exchange: Normal  
Stair Correction: OFF

[Attachment Properties]  
Attachment: None

[Operation]  
Threshold: 0.0010000  
Points: 4  
Interpolate: Disabled  
Average: Disabled

[Sample Preparation Properties]  
Weight:  
.....

Page 1 / 1

UV spectrum of 5

## 7.2 1D and 2D NMR spectra of 5 in pyridine-d<sub>5</sub>

### 7.2.1 <sup>1</sup>H NMR spectrum of 5 in pyridine-d<sub>5</sub>

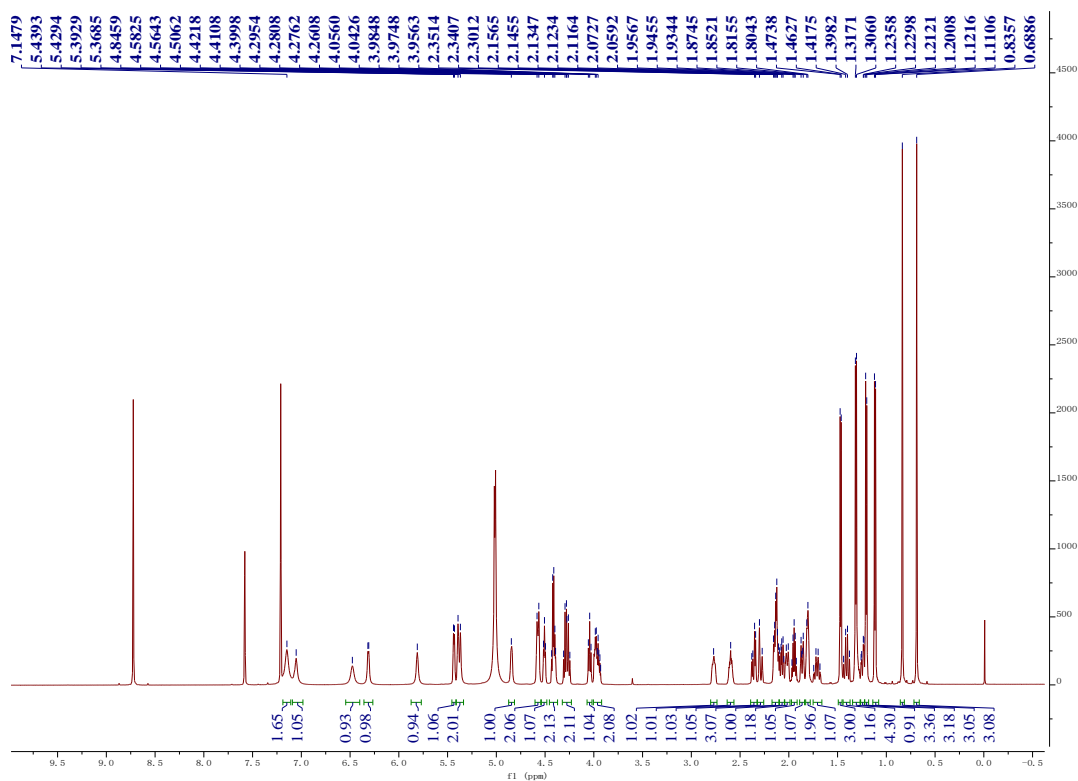

### 7.2.2 <sup>13</sup>C NMR spectrum of 5 in pyridine-d<sub>5</sub>

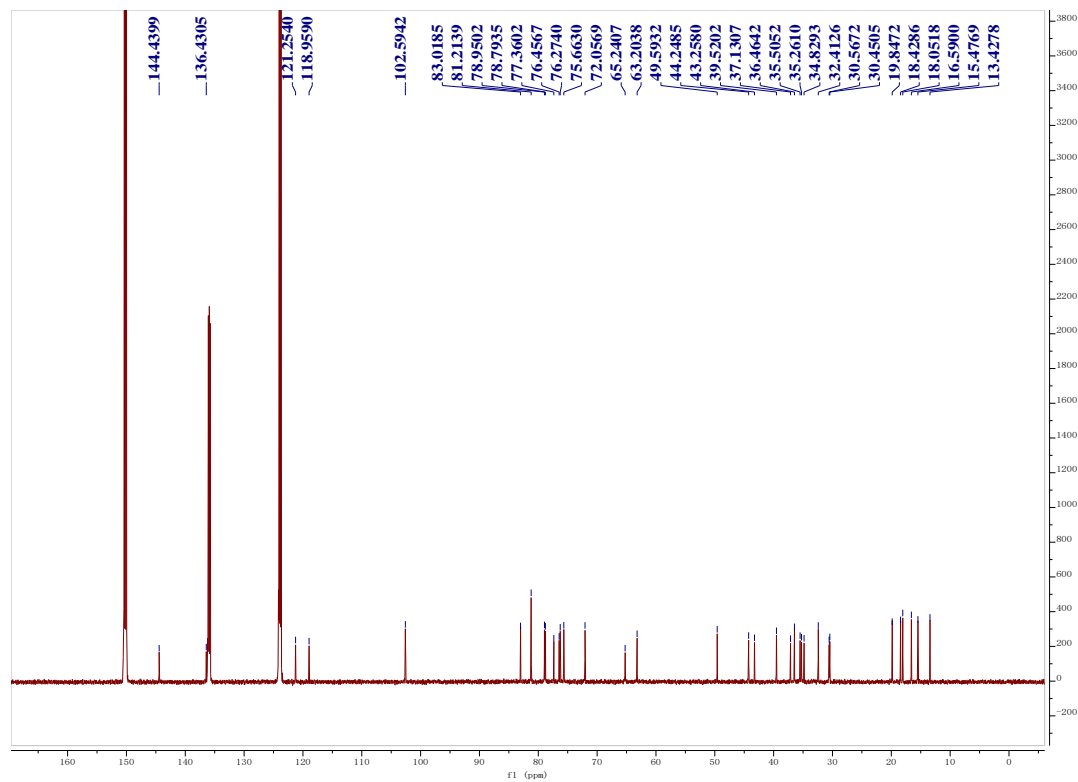

### 7.2.3 DEPT-135 spectrum of 5 in pyridine-d<sub>5</sub>

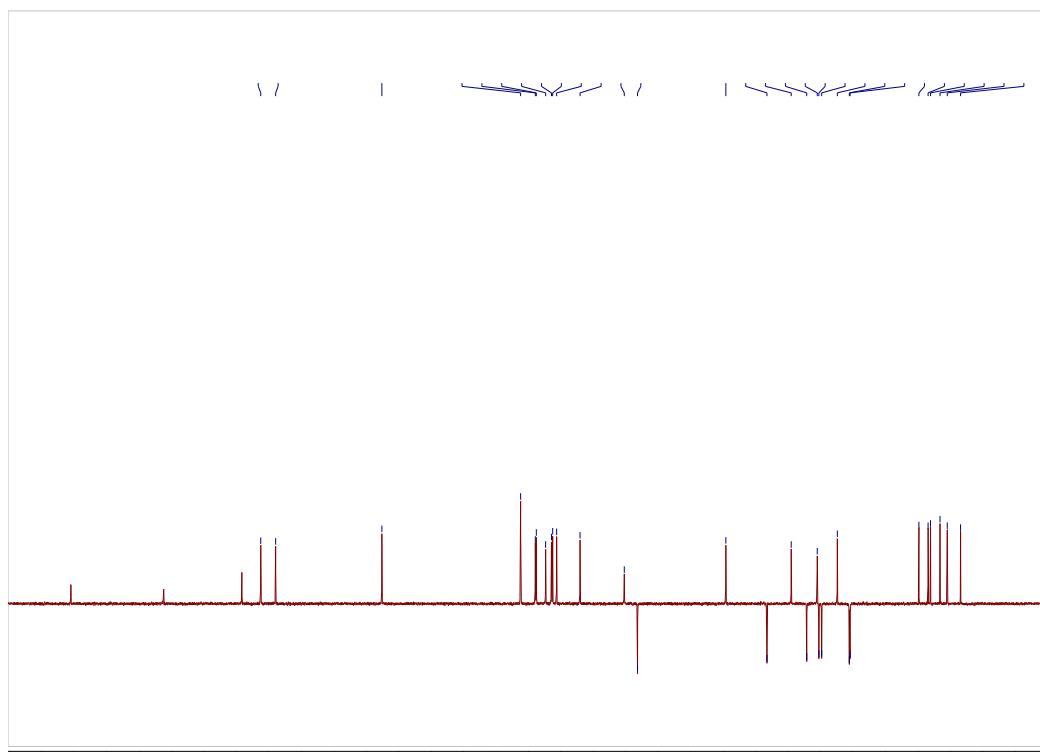

### 7.2.4 <sup>1</sup>H-<sup>1</sup>H COSY spectrum of 5 in pyridine-d<sub>5</sub>

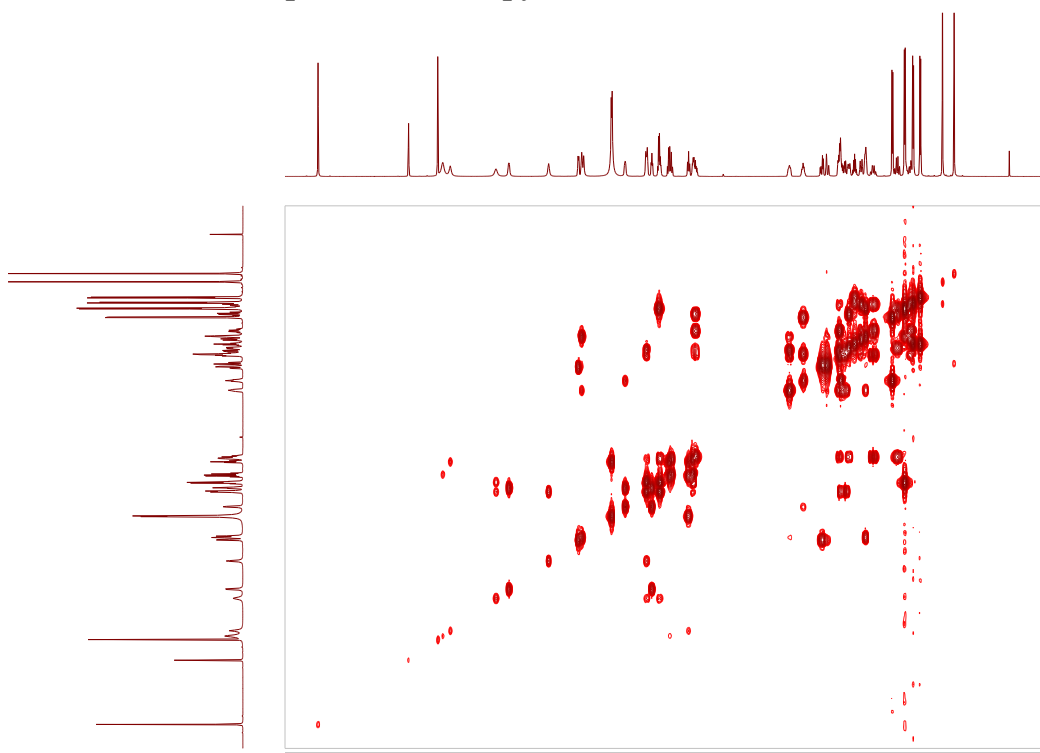

### 7.2.5 HSQC spectrum of 5 in pyridine-d<sub>5</sub>

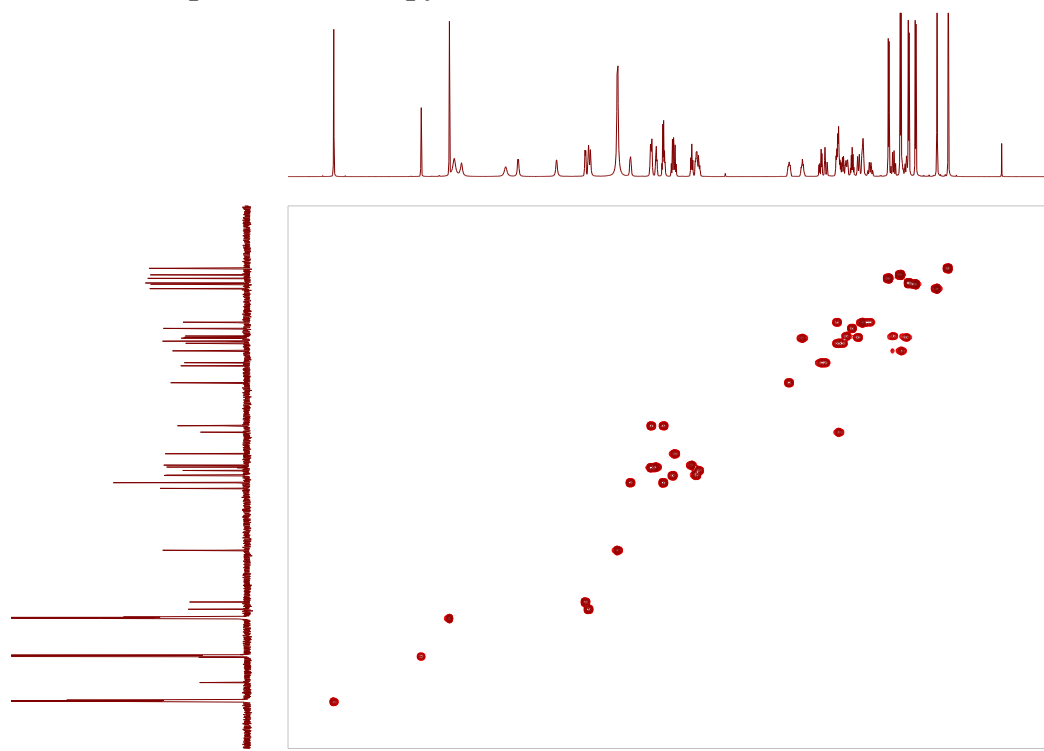

### 7.2.6 HMBC spectrum of 5 in pyridine-d<sub>5</sub>

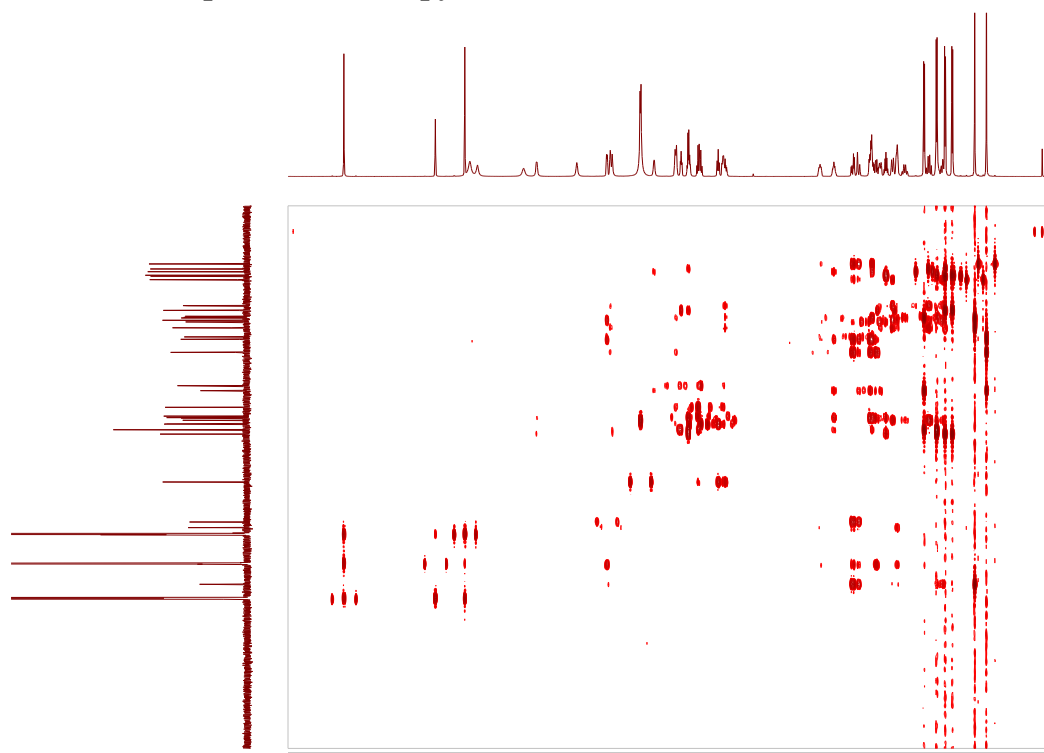

### 7.2.7 NOESY spectrum of 5 in pyridine-d<sub>5</sub>

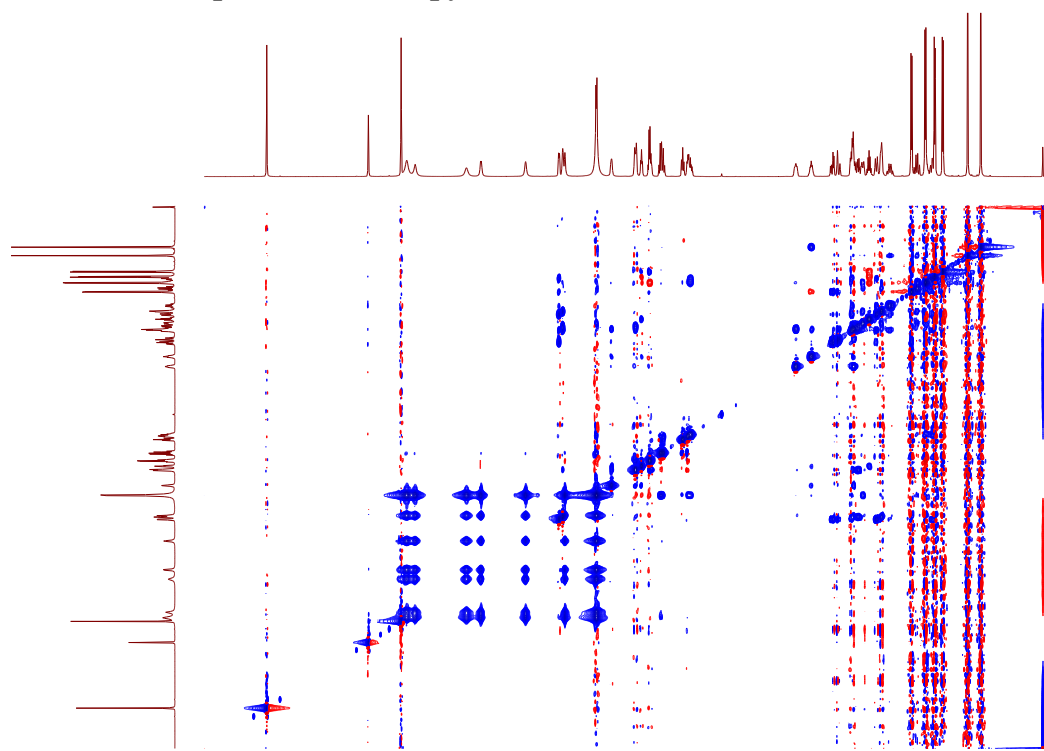

## 8. Spectral information of 6

### 8.1 HR-ESI-MS and UV (CH<sub>3</sub>OH) spectrum of 6

#### HR-ESI-MS and UV (CH<sub>3</sub>OH) spectrum of 6

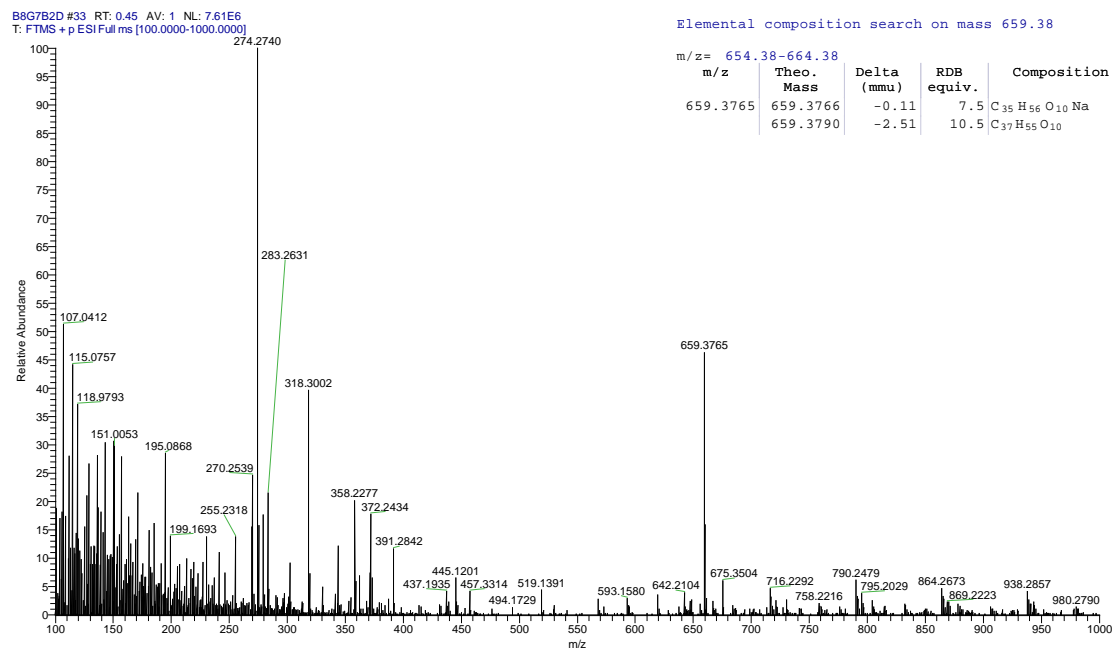

HR-ESI-MS of compound 6



## Spectrum Peak Pick Report

2019-05-08 20:35:10

Data Set: B8G7B2D 0.0384 mg ml - RawData

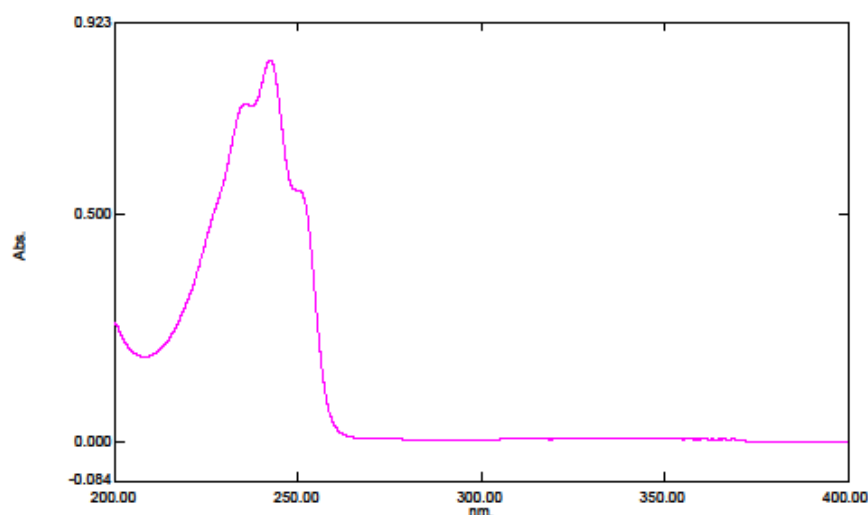

[Measurement Properties]  
Wavelength Range (nm.): 200.00 to 400.00  
Scan Speed: Medium  
Sampling Interval: 0.2  
Auto Sampling Interval: Enabled  
Scan Mode: Single

| No. | P/V | Wavelength | Abs.  | Description |
|-----|-----|------------|-------|-------------|
| 1   | 📍   | 370.80     | 0.006 |             |
| 2   | 📍   | 325.40     | 0.008 |             |
| 3   | 📍   | 308.00     | 0.009 |             |
| 4   | 📍   | 242.40     | 0.839 |             |
| 5   | 📍   | 235.60     | 0.744 |             |

[Instrument Properties]  
Instrument Type: UV-2600 Series  
Measuring Mode: Absorbance  
Slit Width: 2.0  
Accumulation time: 0.1 sec.  
Light Source Change Wavelength: 323.0 nm  
Detector Unit: Direct  
S/R Exchange: Normal  
Stair Correction: OFF

[Attachment Properties]  
Attachment: None

[Operation]  
Threshold: 0.0010000  
Points: 4  
InterPolate: Disabled  
Average: Disabled

[Sample Preparation Properties]  
Weight:  
.....

Page 1 / 1

UV spectrum of 6

## 8.2 1D and 2D NMR spectra of 6 in pyridine-d<sub>5</sub>

### 8.2.1 <sup>1</sup>H NMR spectrum of 6 in pyridine-d<sub>5</sub>

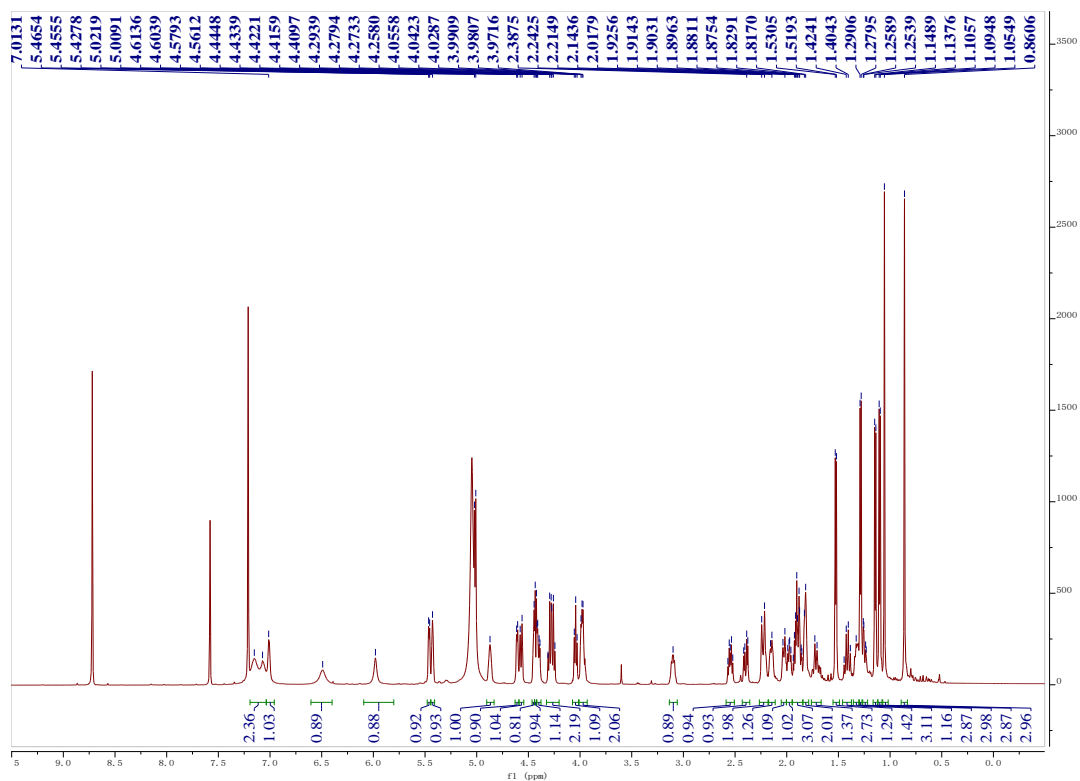

### 8.2.2 <sup>13</sup>C NMR spectrum of 6 in pyridine-d<sub>5</sub>

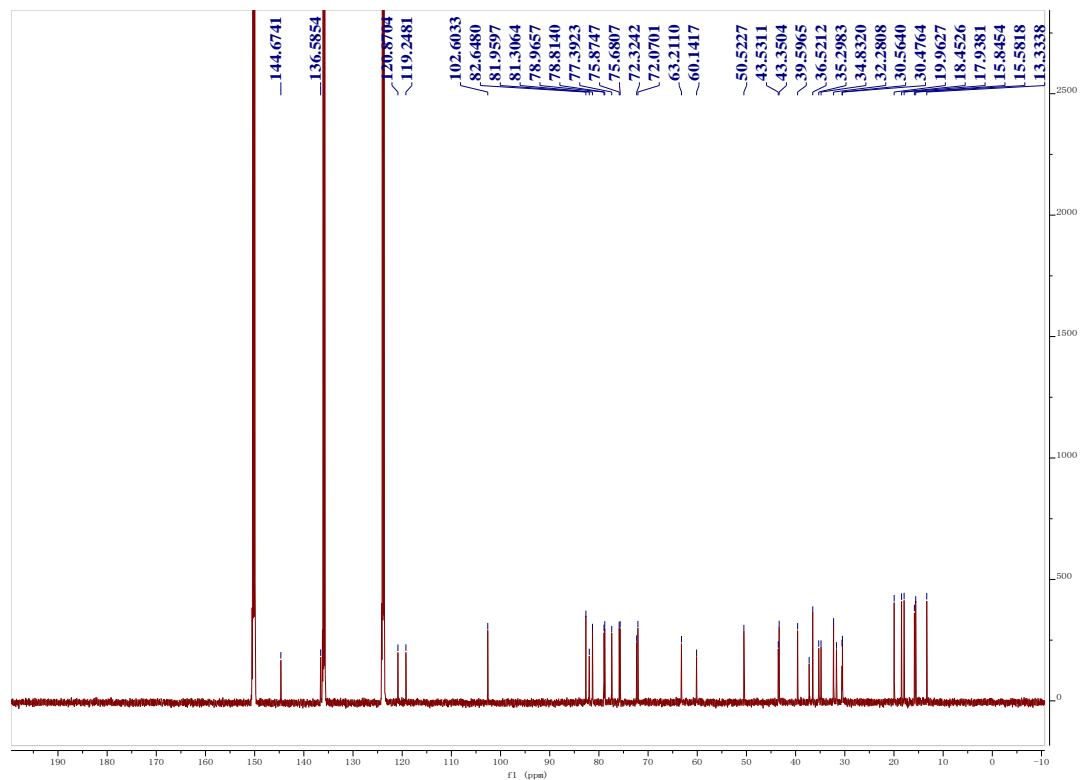

### 8.2.3 DEPT-135 spectrum of 6 in pyridine-d<sub>5</sub>

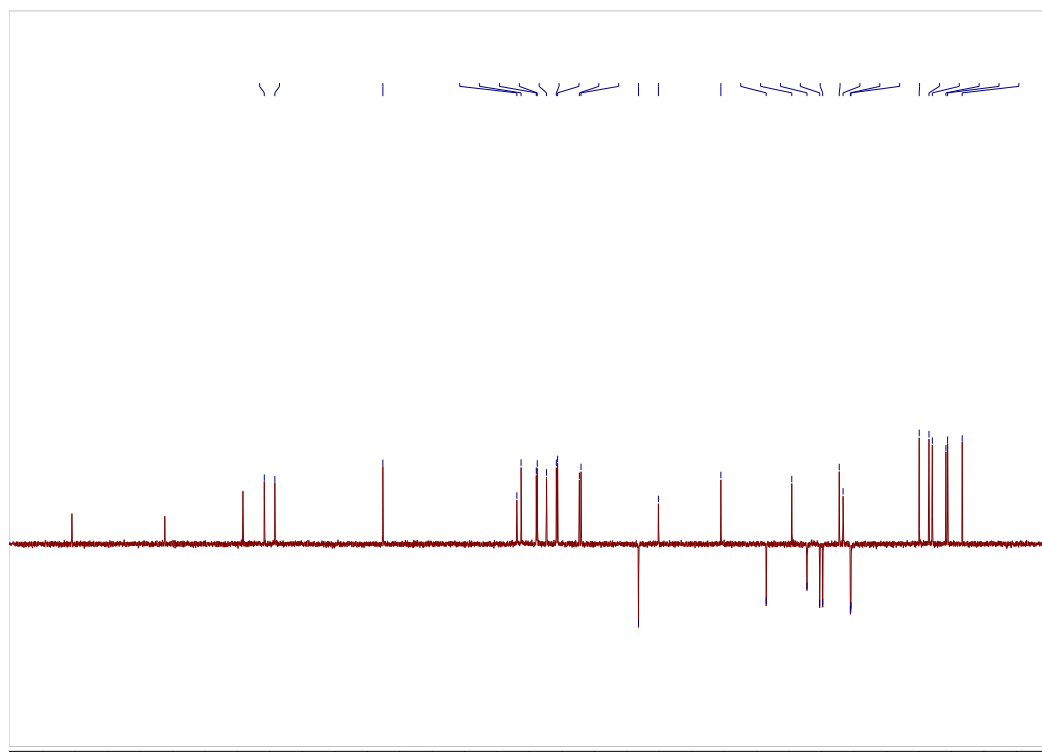

### 8.2.4 <sup>1</sup>H–<sup>1</sup>H COSY spectrum of 6 in pyridine-d<sub>5</sub>

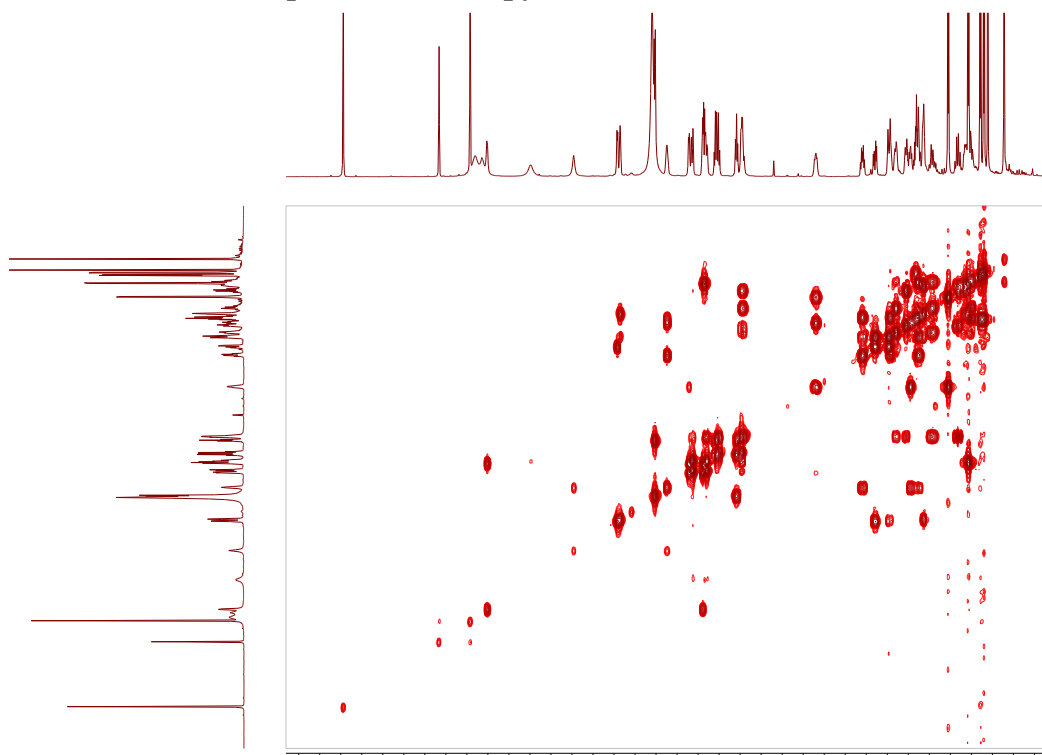

### 8.2.5 HSQC spectrum of 6 in pyridine-d<sub>5</sub>

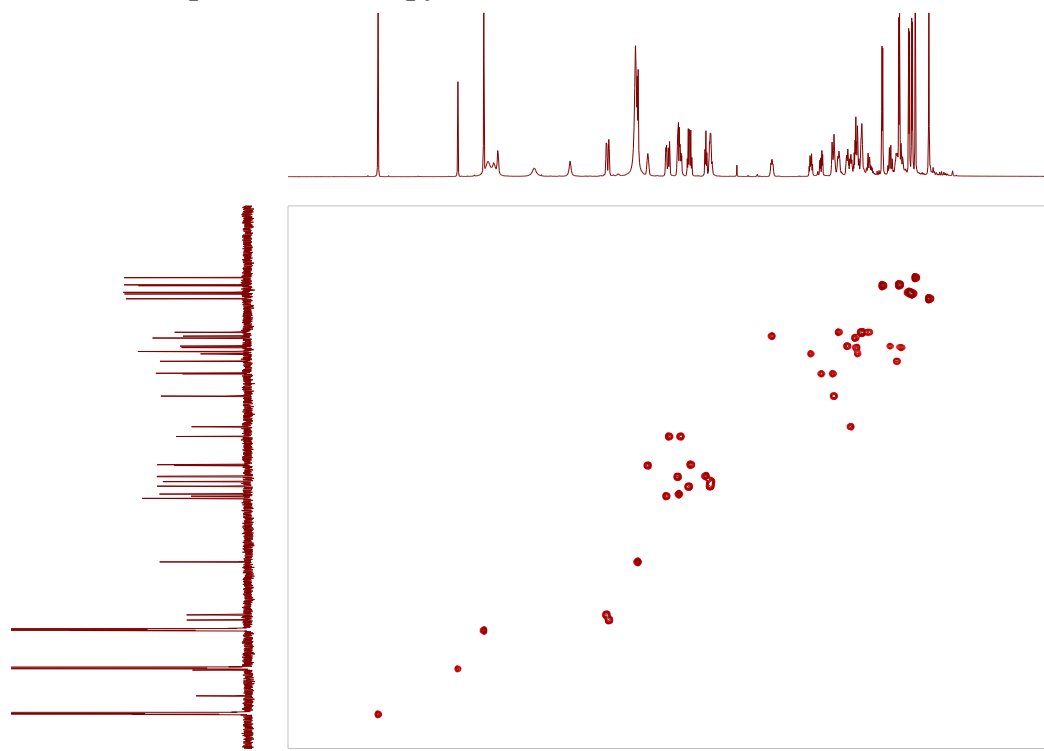

### 8.2.6 HMBC spectrum of 6 in pyridine-d<sub>5</sub>

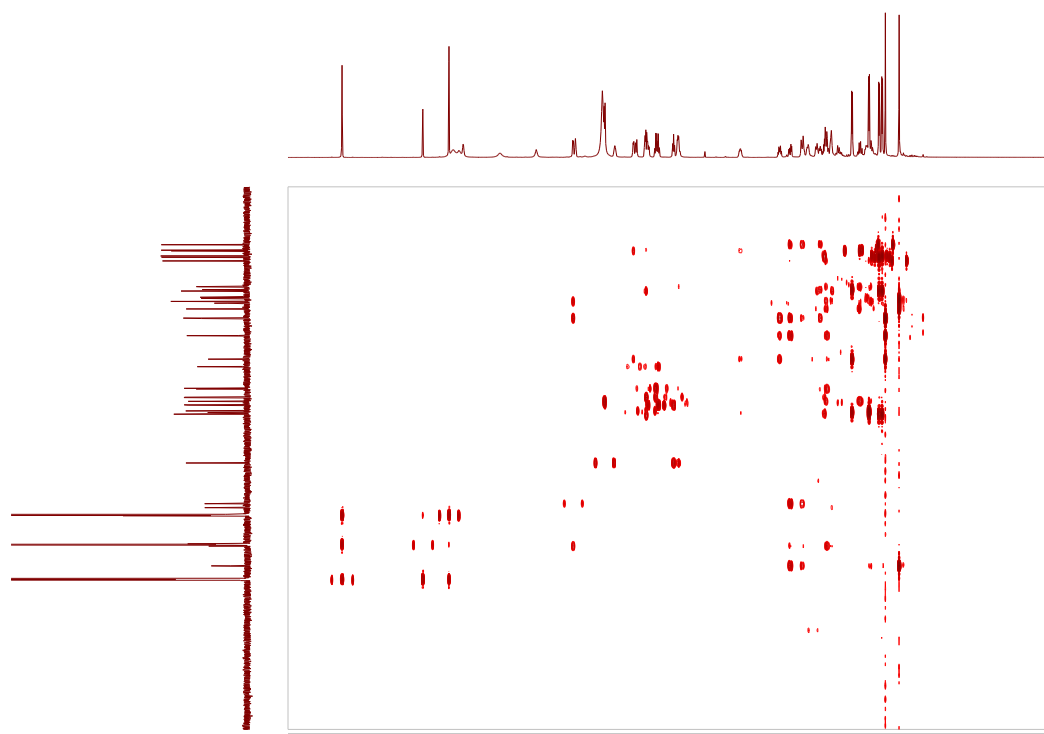

### 8.2.7 NOESY spectrum of 6 in pyridine-d<sub>5</sub>

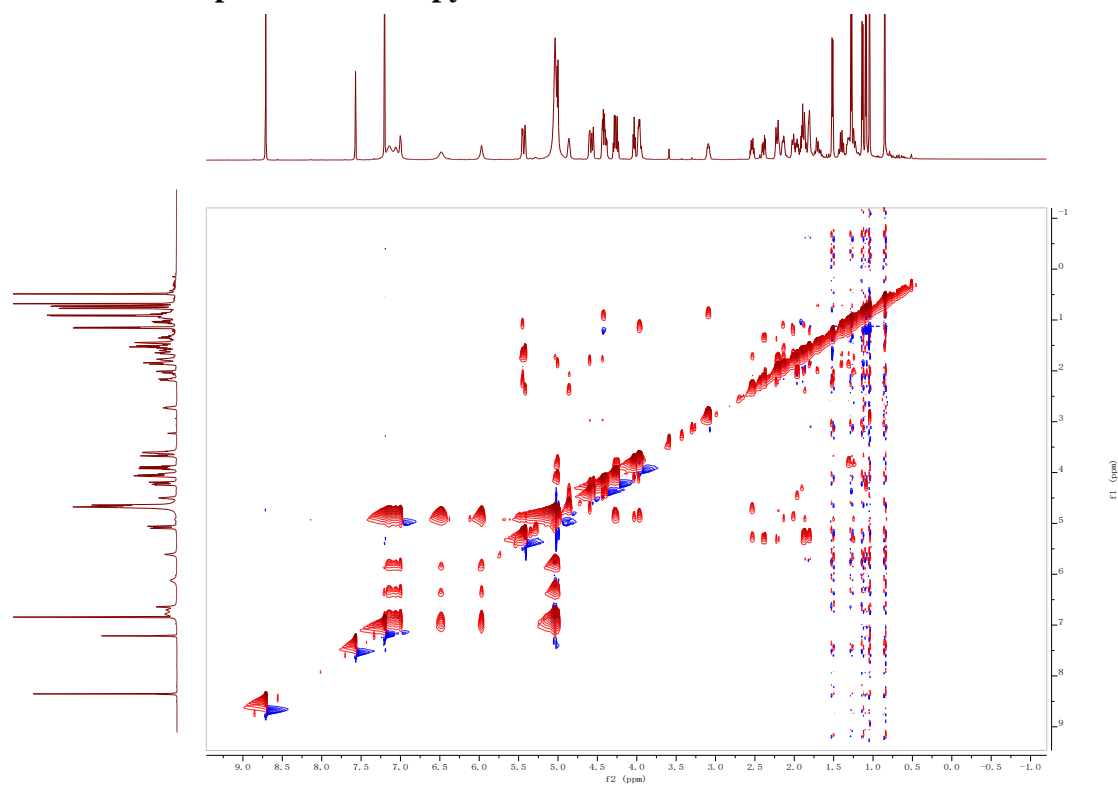

## 9. Spectral information of 7

### 9.1 HR-ESI-MS and UV (CH<sub>3</sub>OH) spectrum of 7

#### HR-ESI-MS, IR and UV (CH<sub>3</sub>OH) spectrum of 7

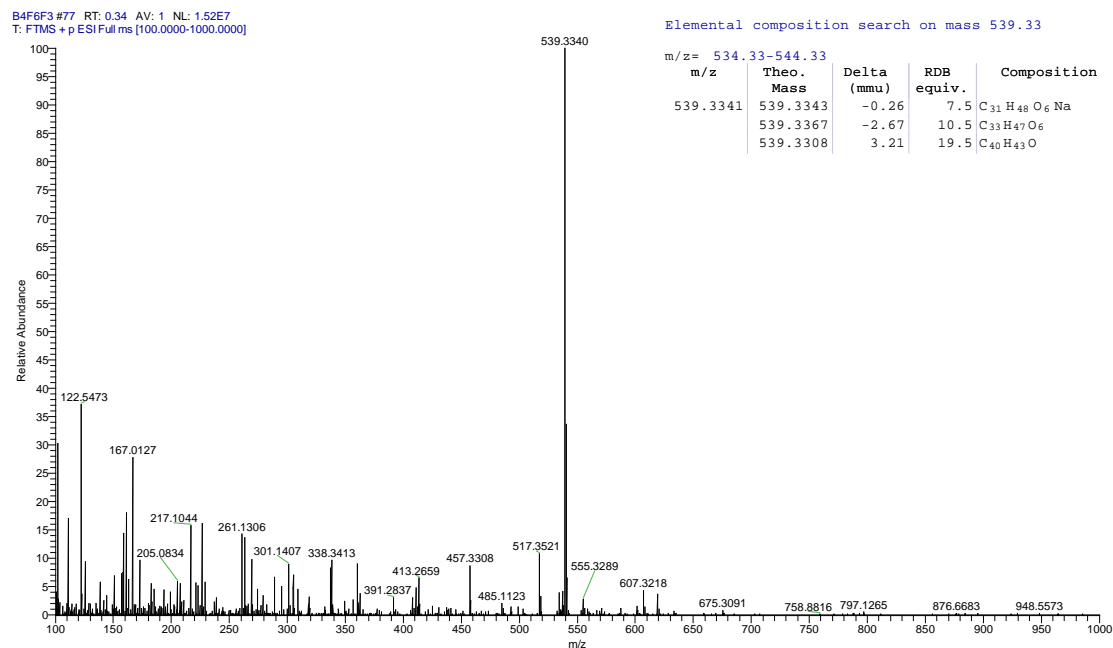

HR-ESI-MS of compound 7

# Spectrum Peak Pick Report

2017-07-07 19:16:25

Data Set: B4F6F3 - RawData

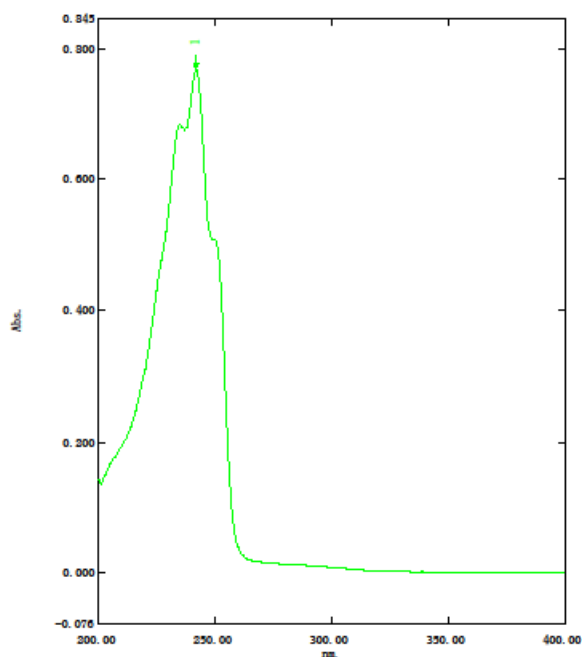

[Measurement Properties]  
Wavelength Range (nm.): 200.00 to 400.00  
Scan Speed: Medium  
Sampling Interval: 1.0  
Auto Sampling Interval: Disabled  
Scan Mode: Auto

[Instrument Properties]  
Instrument Type: UV-2600 Series  
Measuring Mode: Absorbance  
Slit Width: 2.0  
Accumulation time: 0.1 sec.  
Light Source Change Wavelength: 323.0 nm  
Detector Unit: Direct  
S/R Exchange: Normal  
Stair Correction: OFF

[Attachment Properties]  
Attachment: None

[Operation]  
Threshold: 0.0010000  
Points: 5  
Interpolate: Disabled  
Average: Disabled

[Sample Preparation Properties]  
Weight:  
Volume:  
Dilution:  
Path length:  
Addition: Member:

| No. | P/V | Wavelength(nm) | Absorbance | description |
|-----|-----|----------------|------------|-------------|
| 1   |     | 242.00         | 0.768      |             |

UV spectrum of 7

## 9.2 1D and 2D NMR spectra of 7 in CD<sub>3</sub>OD

### 9.2.1 <sup>1</sup>H NMR spectrum of 7 in CD<sub>3</sub>OD

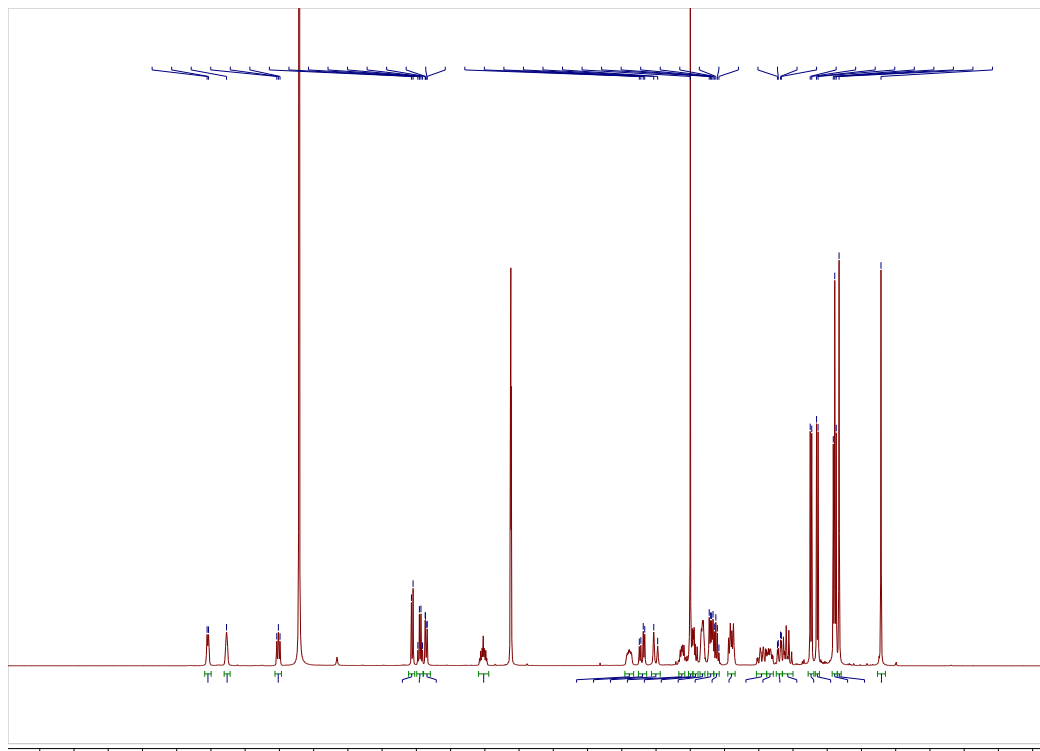

### 9.2.2 <sup>13</sup>C NMR spectrum of 7 in CD<sub>3</sub>OD

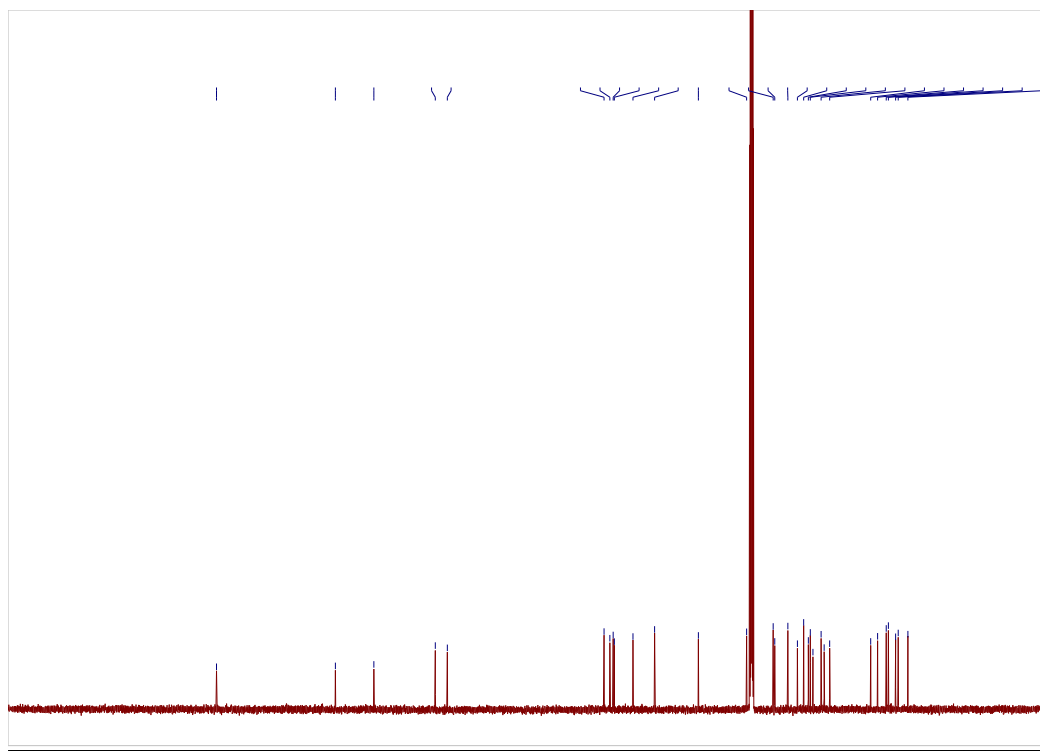



### 9.2.3 DEPT-135 spectrum of 7 in CD<sub>3</sub>OD

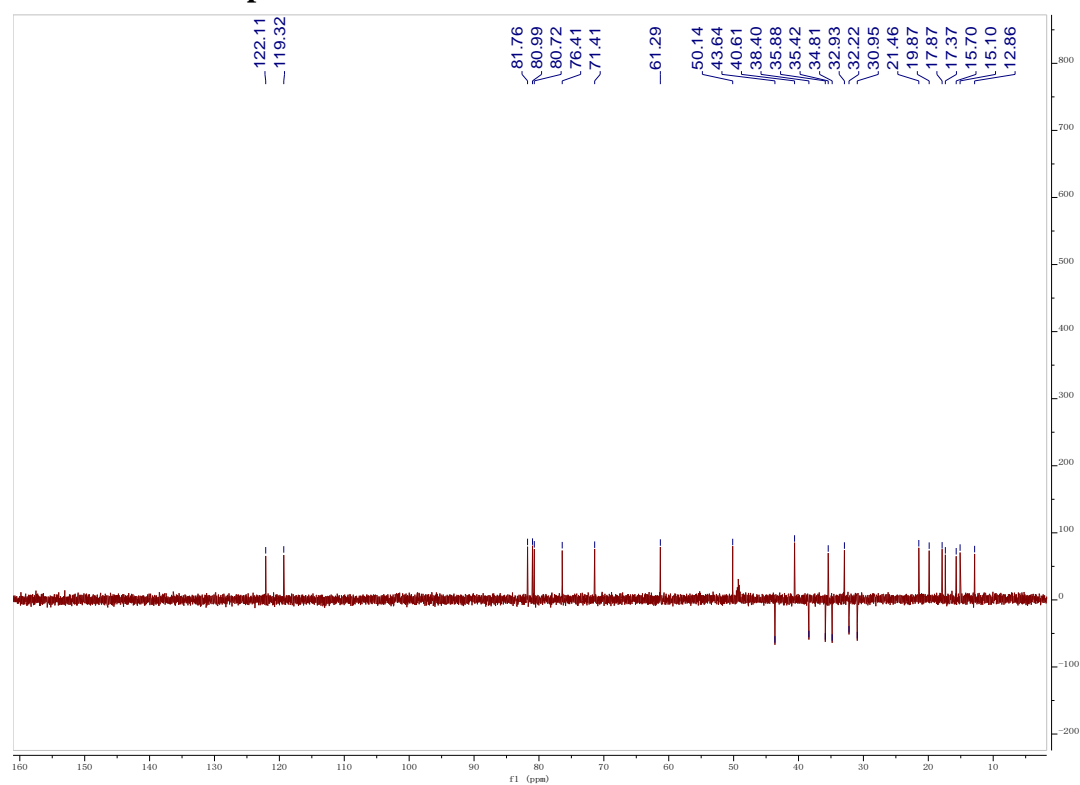

### 9.2.4 <sup>1</sup>H-<sup>1</sup>H COSY spectrum of 7 in CD<sub>3</sub>OD

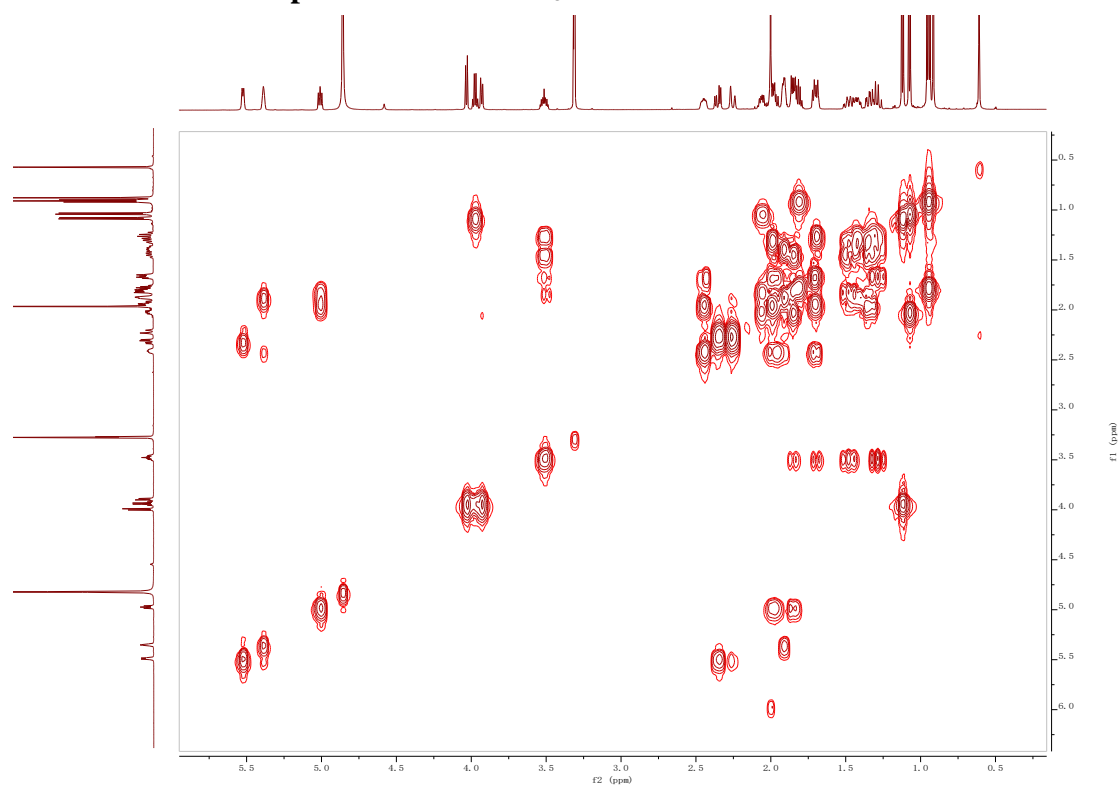

### 9.2.5 HSQC spectrum of 7 in CD<sub>3</sub>OD

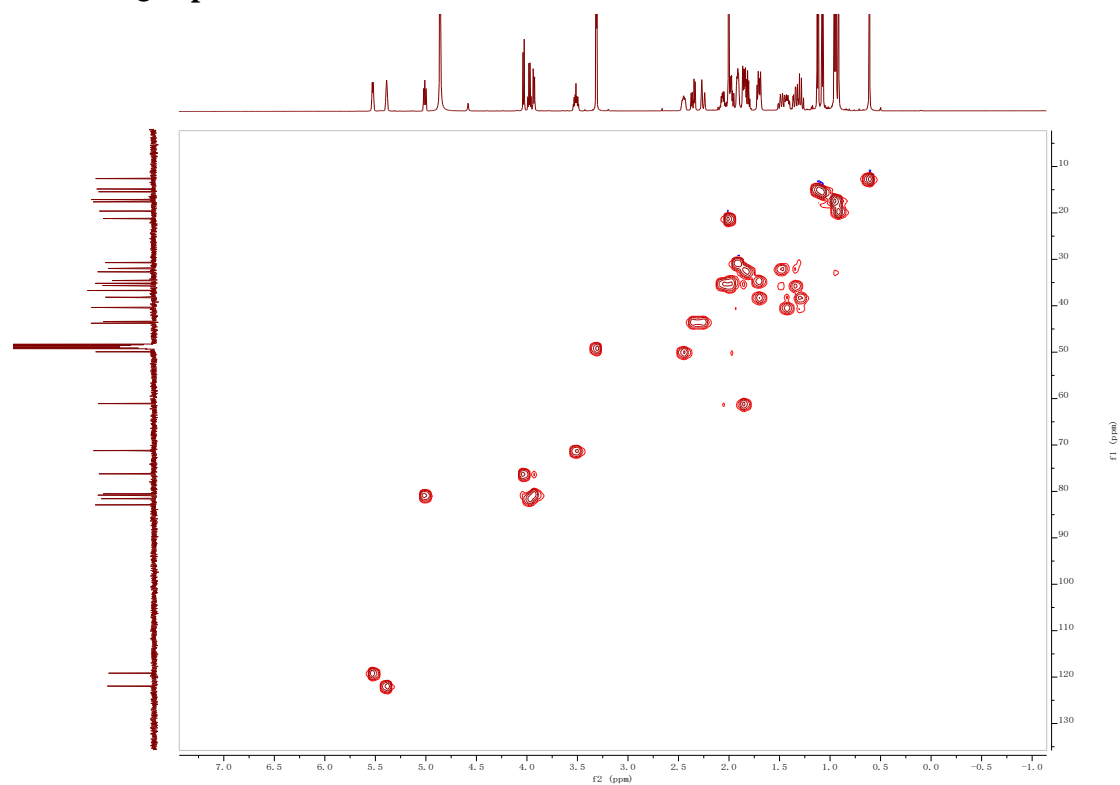

### 9.2.6 HMBC spectrum of 7 in CD<sub>3</sub>OD

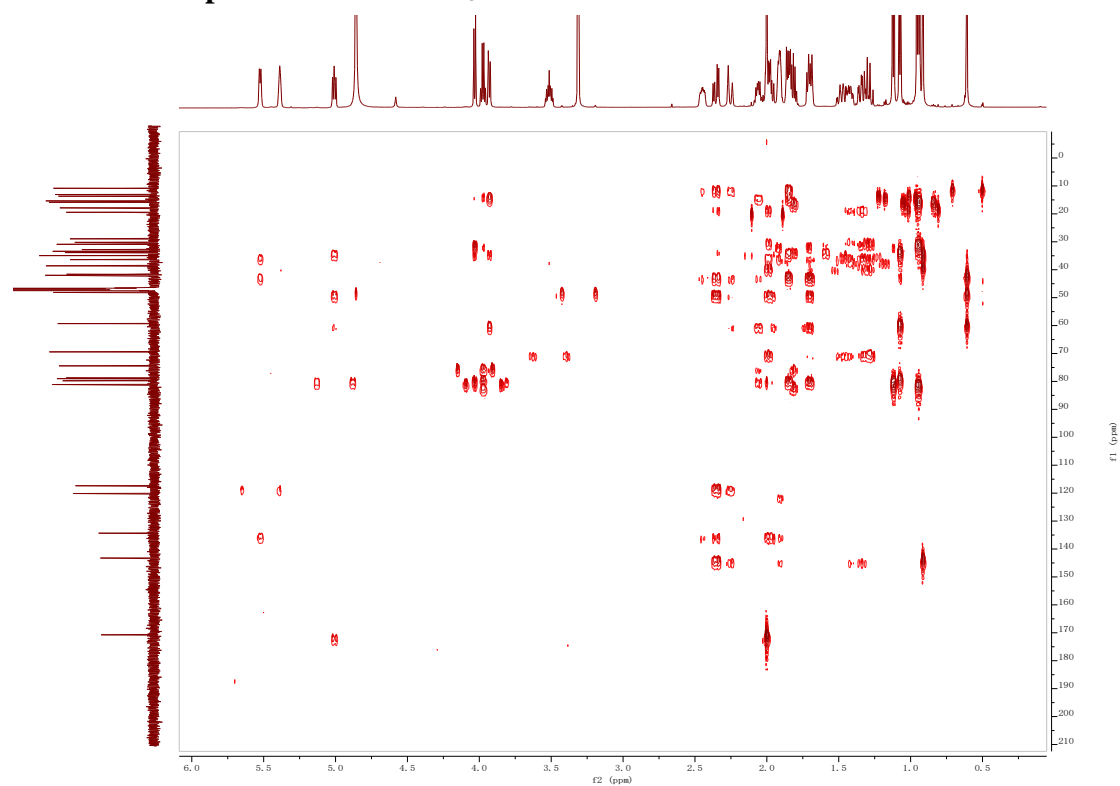

### 9.2.7 NOESY spectrum of 7 in CD<sub>3</sub>OD

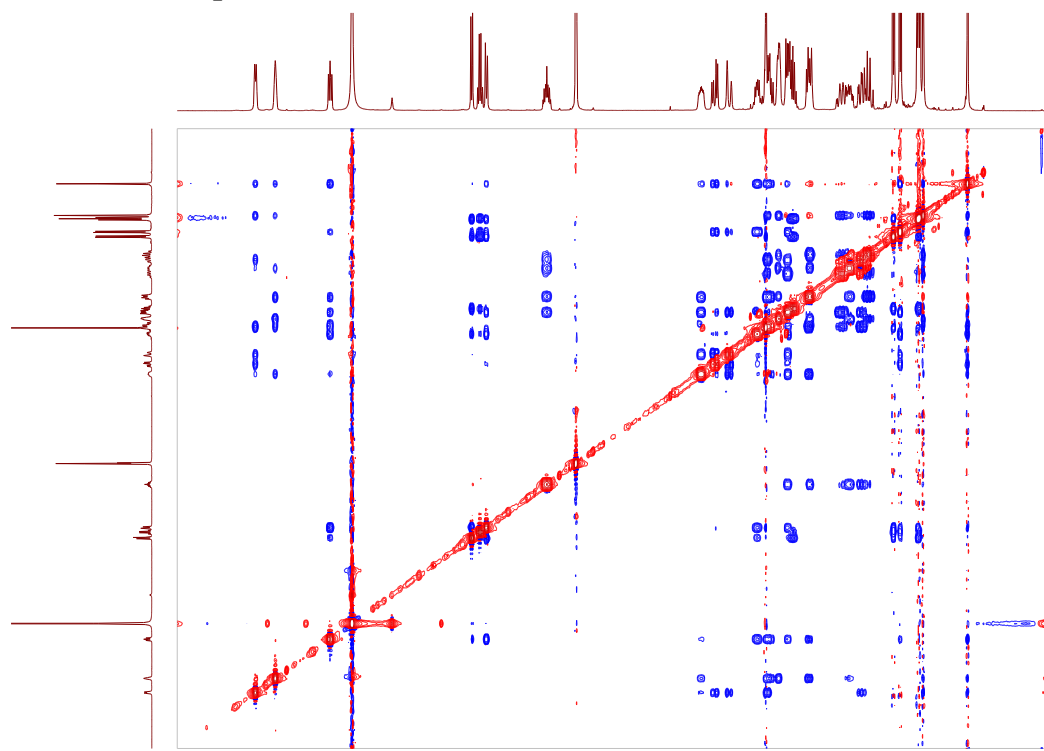

## 10. Spectral information of 8

### 10.1 HR-ESI-MS and UV (CH<sub>3</sub>OH) spectrum of 8

#### HR-ESI-MS and UV (CH<sub>3</sub>OH) spectrum of 8

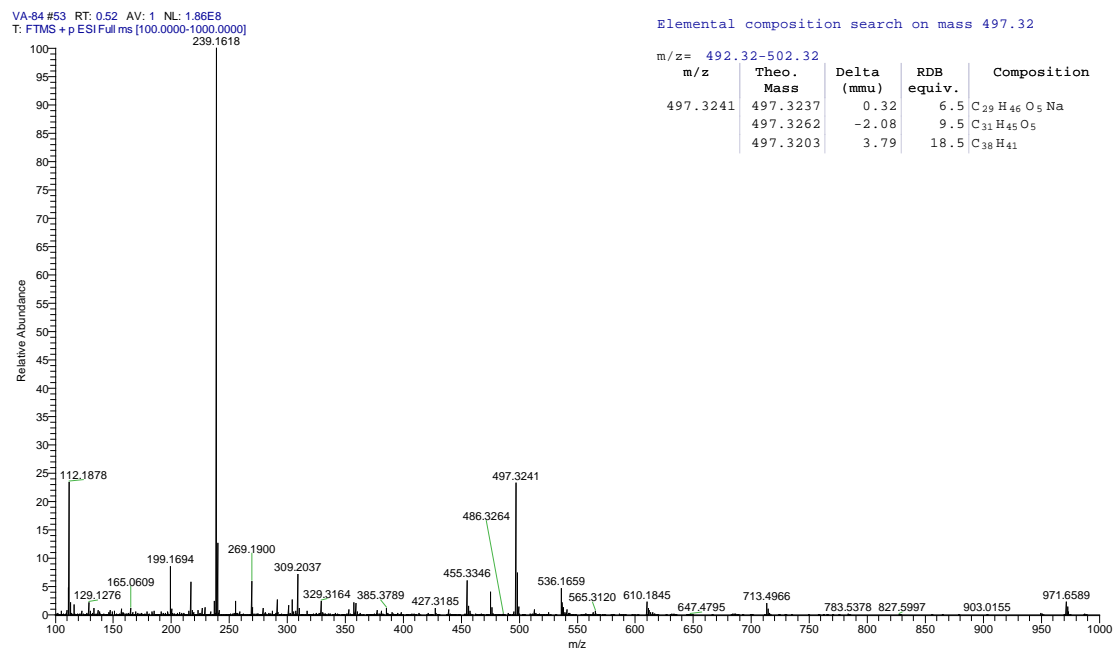

HR-ESI-MS of compound 8

## Spectrum Peak Pick Report

2019-11-07 21:52:27

Data Set: VA-84 0.0242 mg ml - RawData

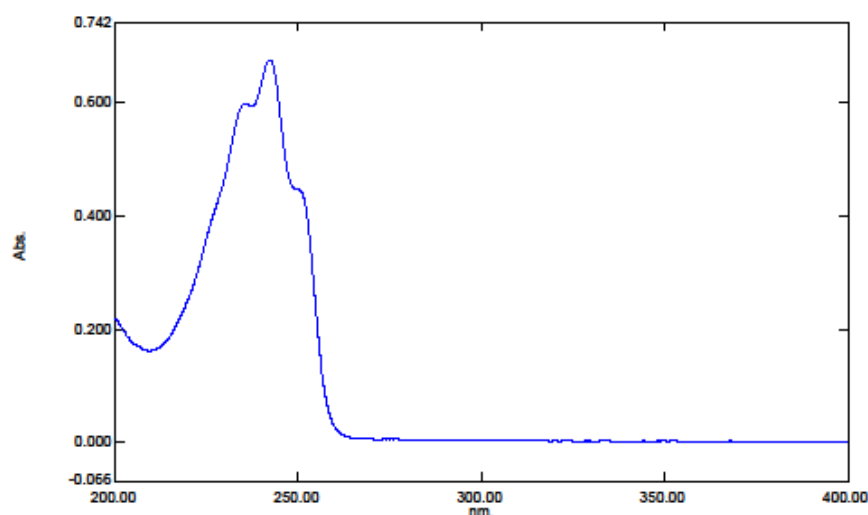

[Measurement Properties]  
Wavelength Range (nm.): 200.00 to 400.00  
Scan Speed: Medium  
Sampling Interval: 0.5  
Auto Sampling Interval: Disabled  
Scan Mode: Auto

[Instrument Properties]  
Instrument Type: UV-2600 Series  
Measuring Mode: Absorbance  
Slit Width: 2.0  
Accumulation time: 0.1 sec.  
Light Source Change Wavelength: 323.0 nm  
Detector Unit: Direct  
S/R Exchange: Normal  
Stair Correction: OFF

[Attachment Properties]  
Attachment: None

[Operation]  
Threshold: 0.0010000  
Points: 4  
InterPolate: Disabled  
Average: Disabled

[Sample Preparation Properties]  
Weight:  
.....

| No. | P/V | Wavelength | Abs.  | Description |
|-----|-----|------------|-------|-------------|
| 1   | 📍   | 366.00     | 0.003 |             |
| 2   | 📍   | 333.50     | 0.003 |             |
| 3   | 📍   | 329.50     | 0.003 |             |
| 4   | 📍   | 242.50     | 0.674 |             |
| 5   | 📍   | 235.50     | 0.597 |             |
| 6   | 📍   | 331.50     | 0.001 |             |
| 7   | 📍   | 325.50     | 0.001 |             |
| 8   | 📍   | 237.50     | 0.593 |             |
| 9   | 📍   | 209.50     | 0.162 |             |

UV spectrum of 8

## 10.2 1D and 2D NMR spectra of 8 in pyridine-d<sub>5</sub>

### 10.2.1 <sup>1</sup>H NMR spectrum of 8 in pyridine-d<sub>5</sub>

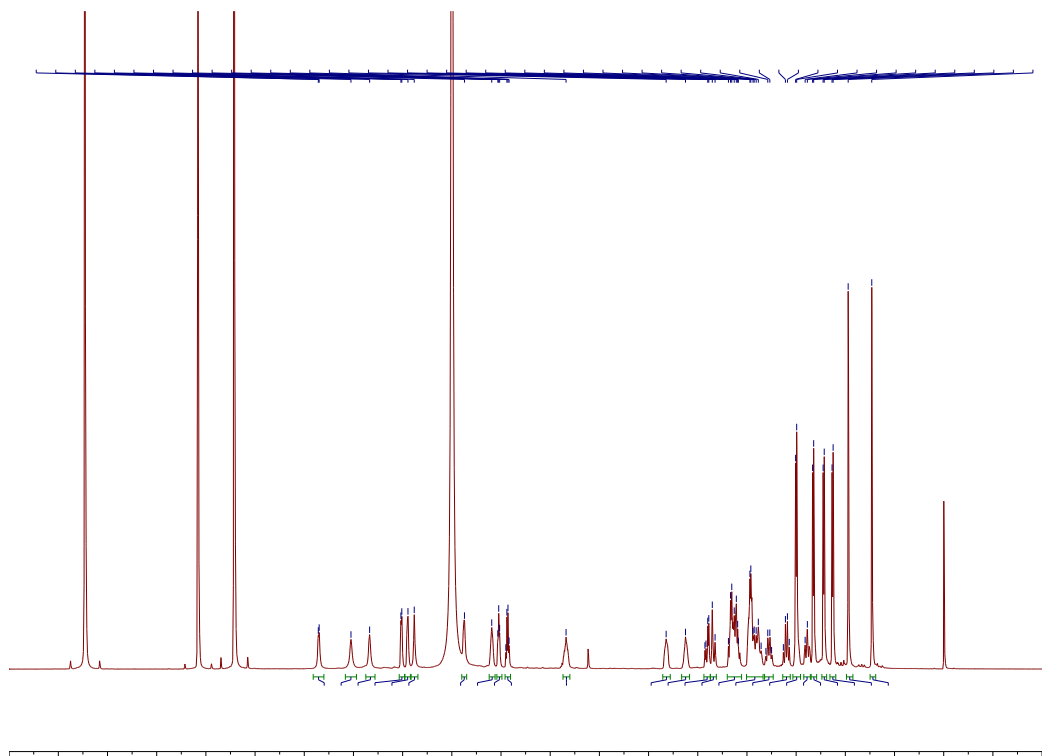

### 10.2.2 <sup>13</sup>C NMR spectrum of 8 in pyridine-d<sub>5</sub>

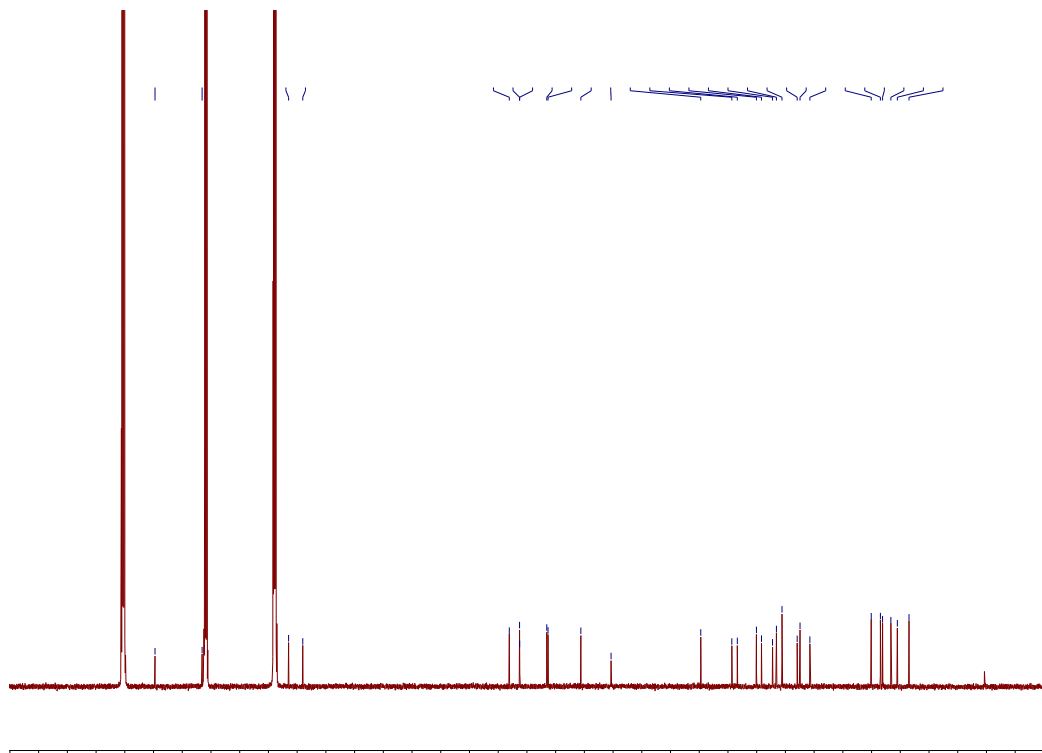

### 10.2.3 DEPT-135 spectrum of 8 in pyridine-d<sub>5</sub>

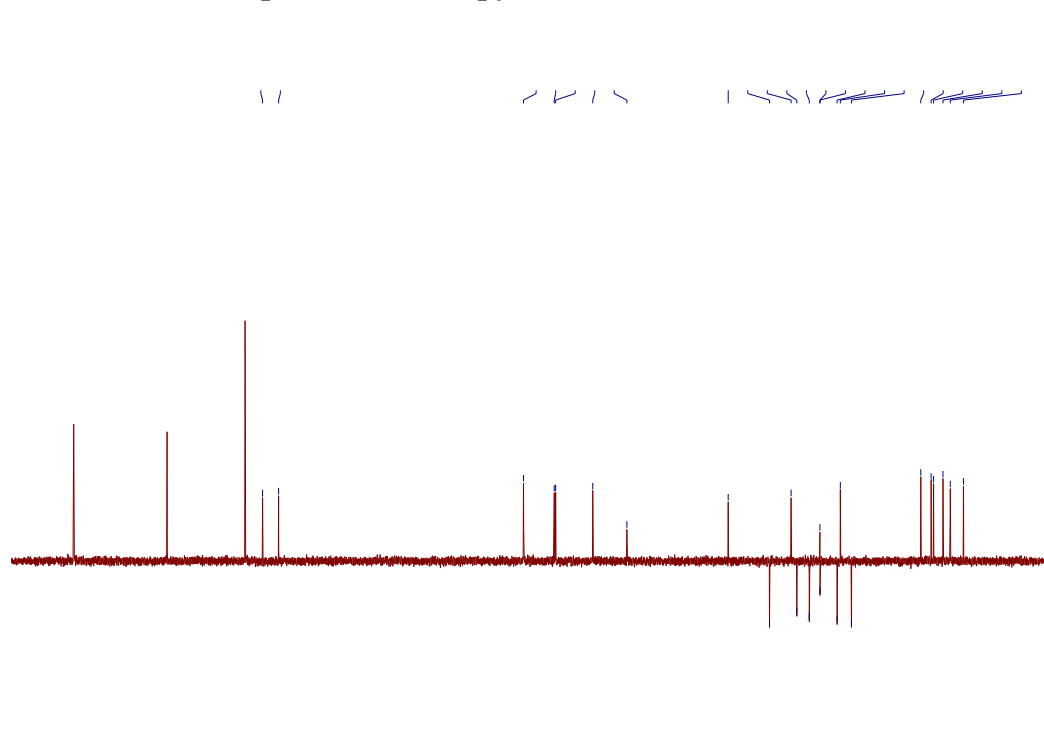

### 10.2.4 <sup>1</sup>H–<sup>1</sup>H COSY spectrum of 8 in pyridine-d<sub>5</sub>

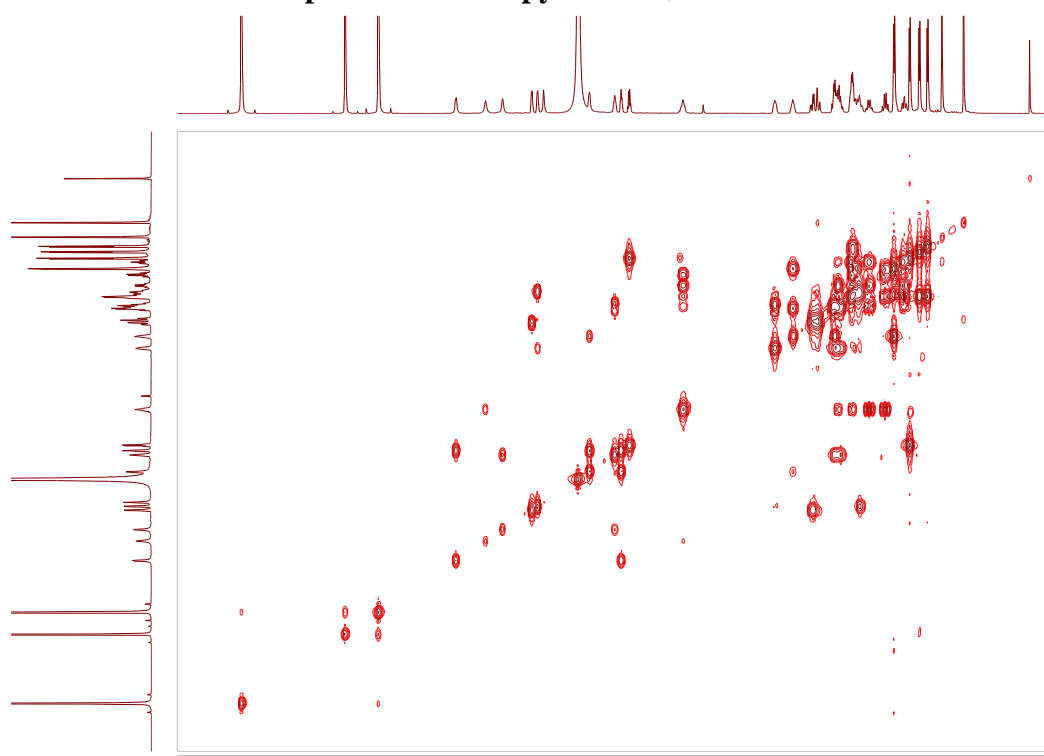

### 10.2.5 HSQC spectrum of 8 in pyridine-d<sub>5</sub>

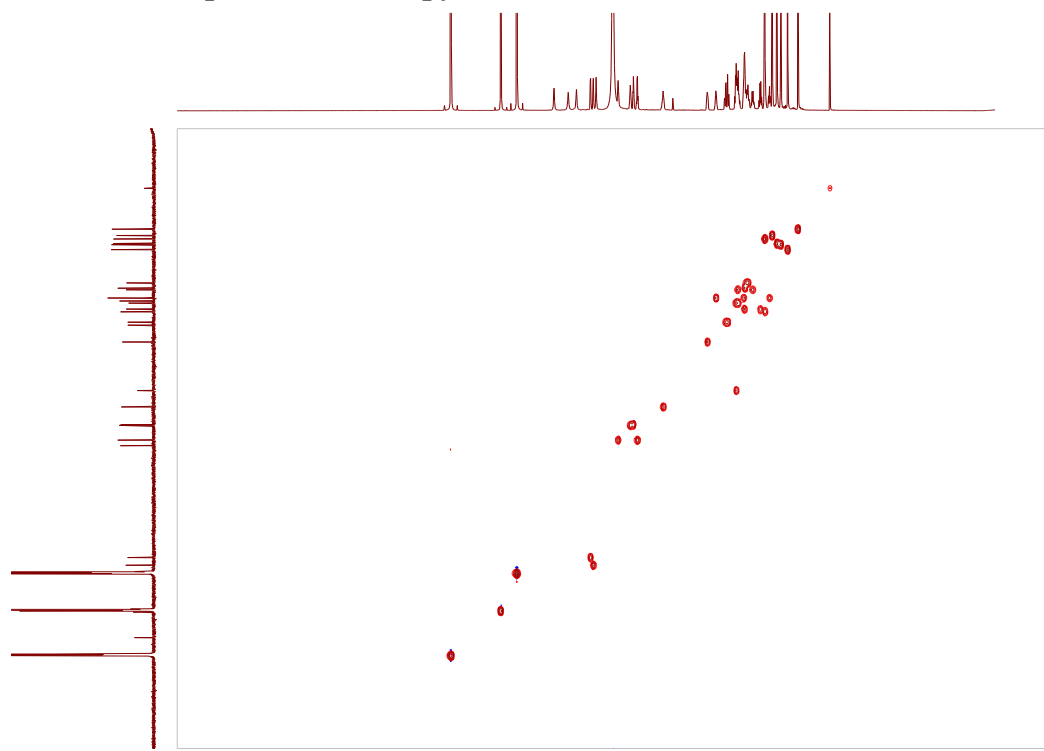

### 10.2.6 HMBC spectrum of 8 in pyridine-d<sub>5</sub>

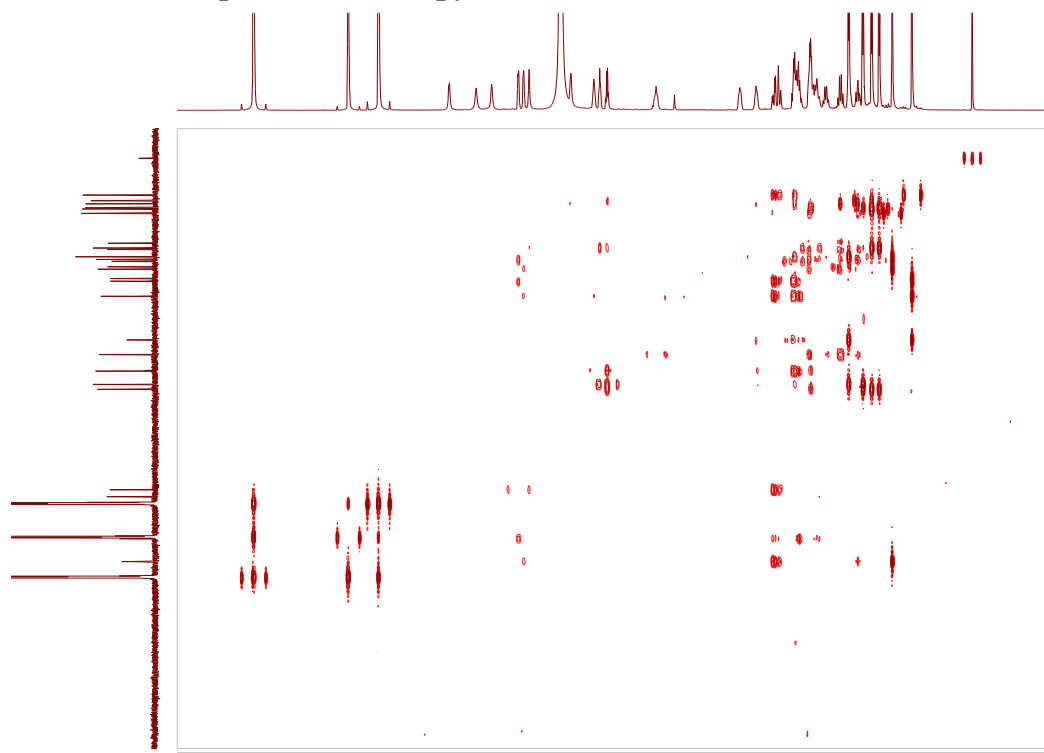



### 10.2.7 NOESY spectrum of 8 in pyridine-d<sub>5</sub>

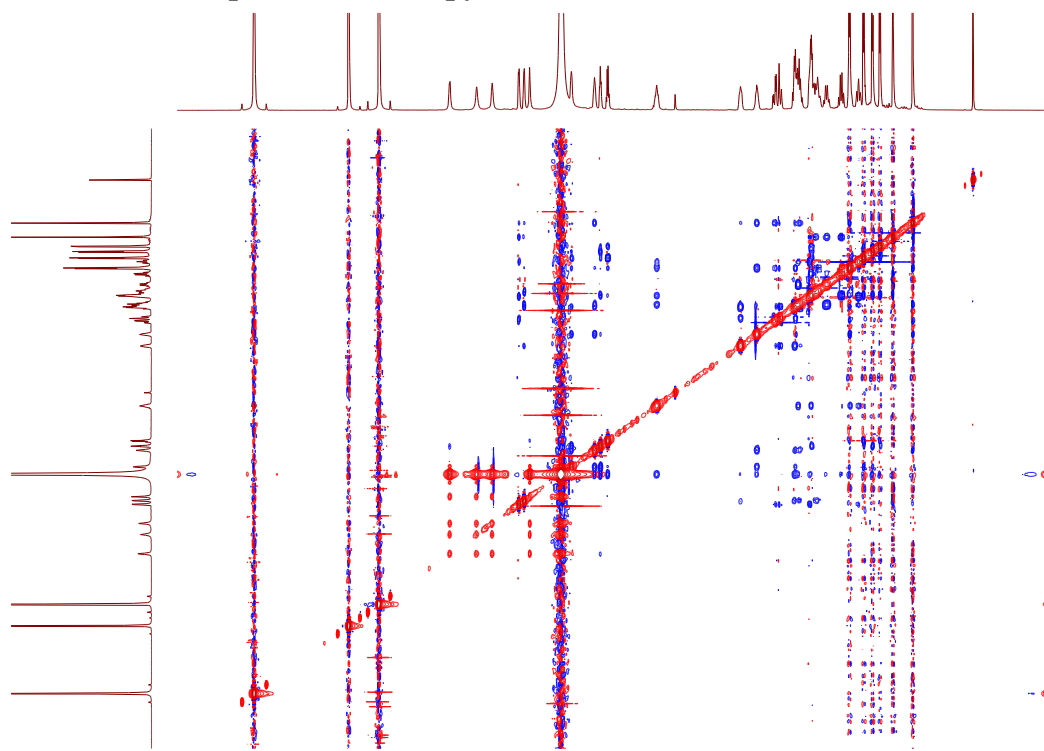

Supplement: s1 [file s1]
